# Supplementary material for: High expression of regulator of G-protein signalling 1 is associated with the poor differentiation and prognosis of gastric cancer
Source: PubMed Central journal article supplement — Oncol Lett. 2021 Feb 23;21(4):322. doi: 10.3892/ol.2021.12584 (PMC7933750; doi:10.3892/ol.2021.12584), 2021-02-23
Supplement: Supplementary_Data.pdf [file Supplementary_Data.pdf]

Figure S1. Immune scores and stromal scores are not associated with the N and M staging of GC. The distribution of ESTIMATE scores in (A) N and (B) M staging; the distribution of stromal scores in (C) N and (D) M staging; and the distribution of immune scores in (E) N and (F) M staging. ns, not significant.

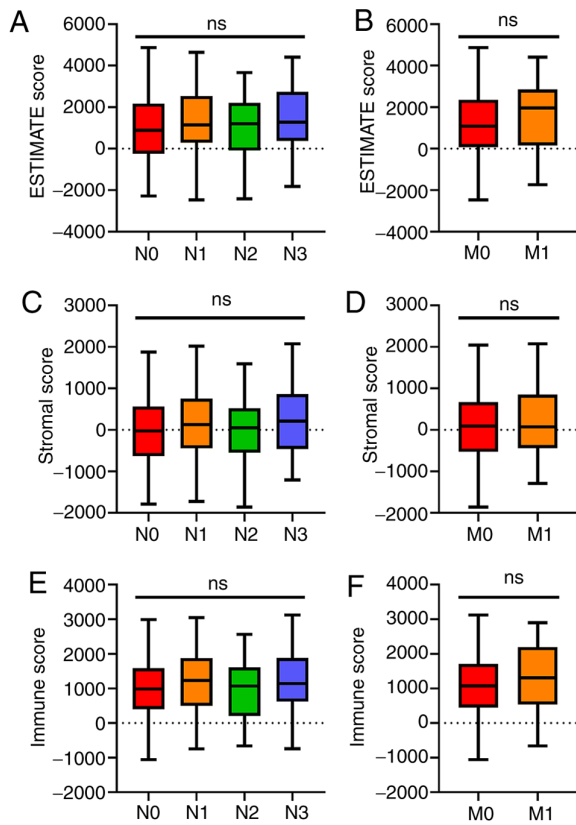

Figure S2. Comparison of gene expression profiles with stromal scores in gastric cancer. In the stromal score group, a heatmap was used to visualize differentially expressed genes. High, high immune score group; low, low immune score group.

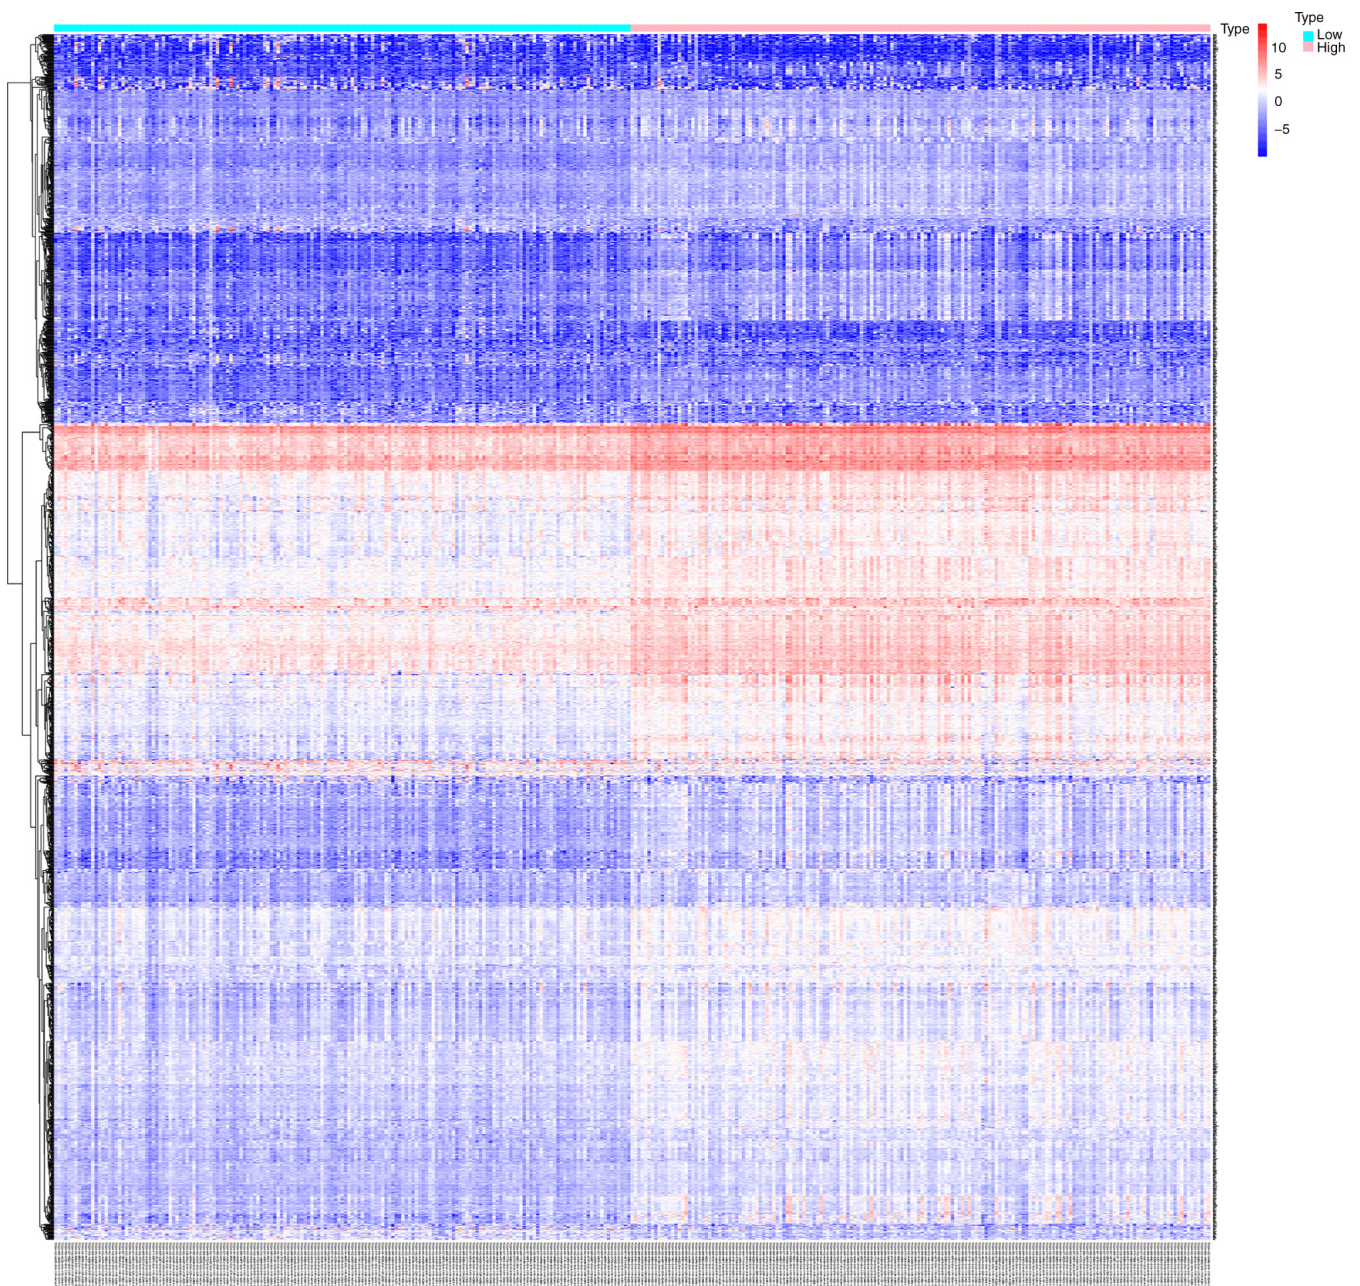

Figure S3. Comparison of gene expression profiles with stromal scores in gastric cancer. In the immune score group, a heatmap was used to visualize differentially expressed genes. High, high immune score group; low, low immune score group.

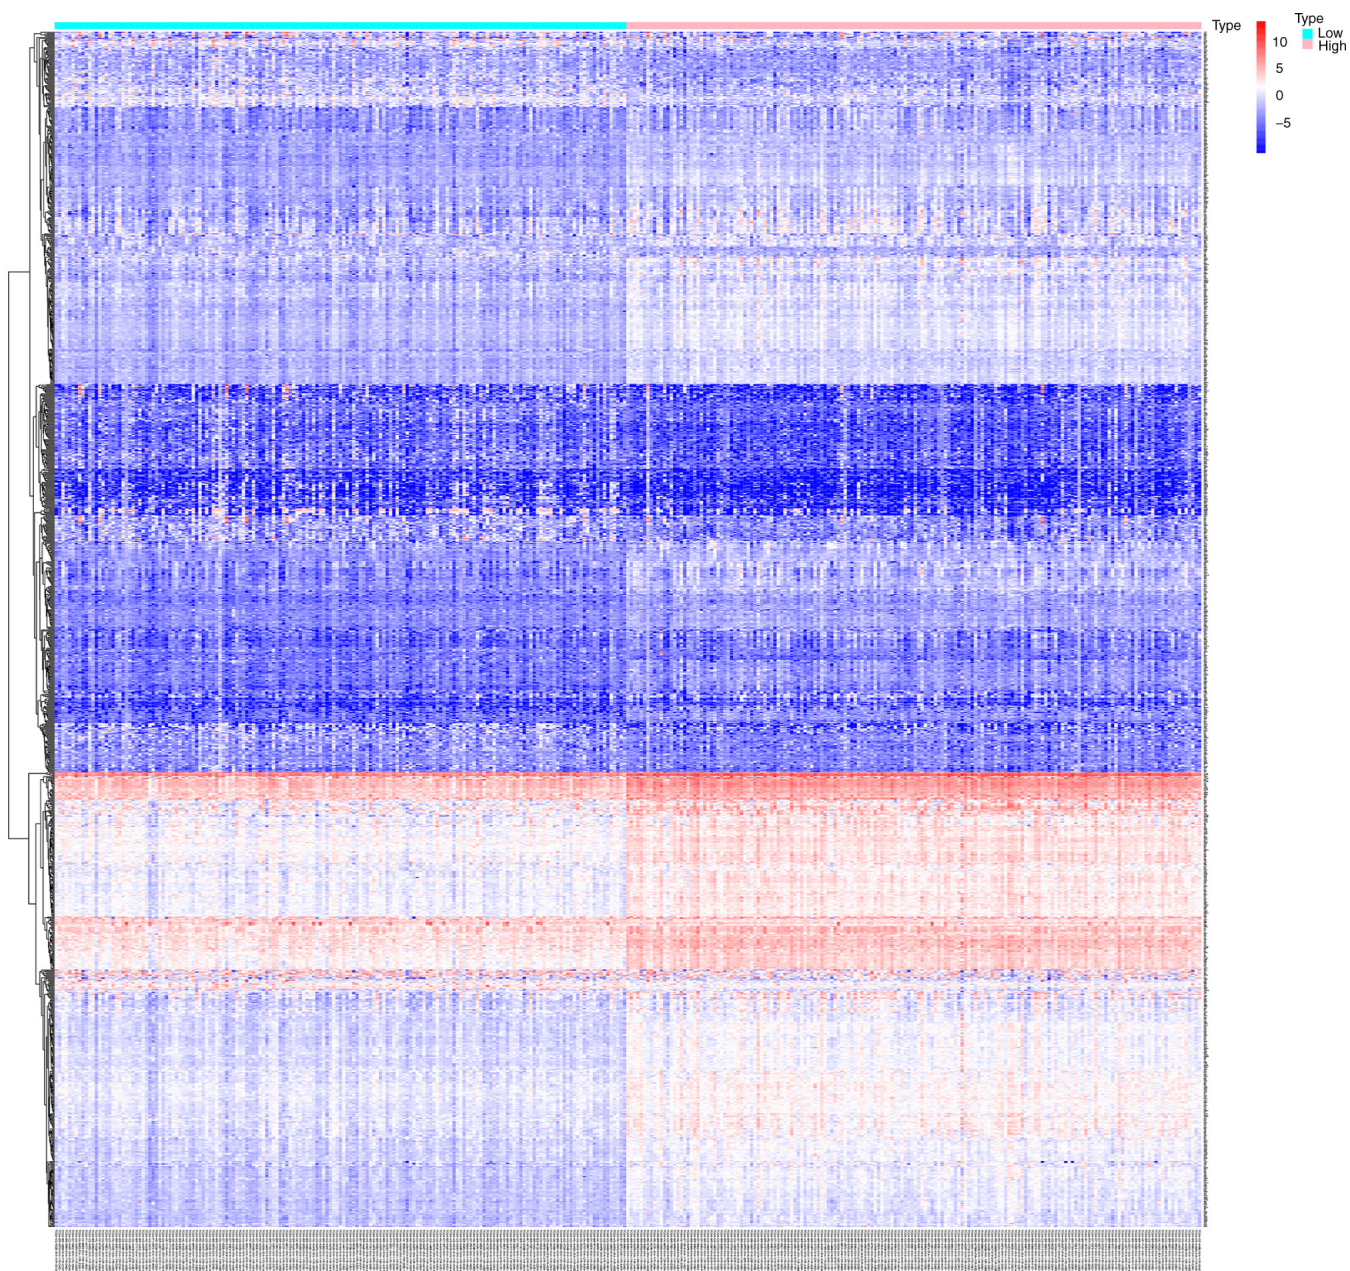

Figure S4. Distribution of gene expression in 50 specimens. The distribution of the  $2^{-\Delta\Delta Cq}$  values of (A) CXCR4, (B) PTGFR and (C) RGS1 in 50 specimens.

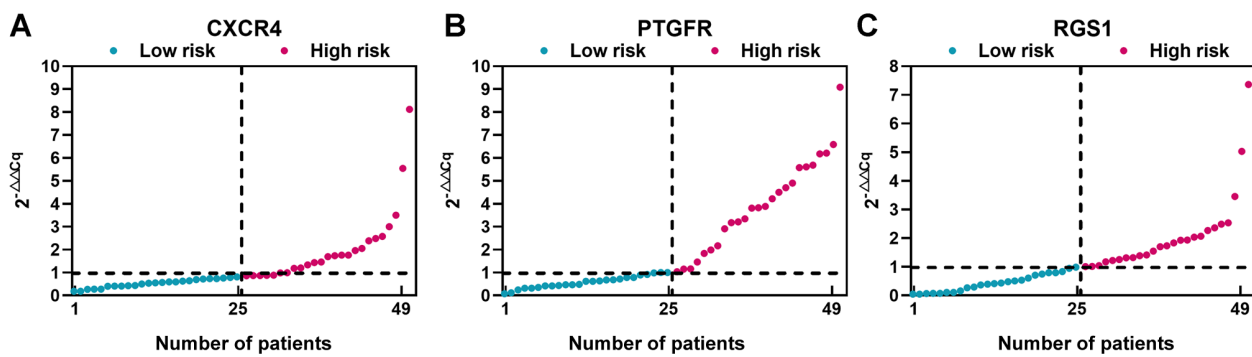

Table SI. Differentially expressed genes with regard to immune scores.

| Gene     | logFC     | FDR                    | P-value                |
|----------|-----------|------------------------|------------------------|
| GIMAP1   | 1.473539  | 1.07x10 <sup>-33</sup> | 1.85x10 <sup>-35</sup> |
| CD274    | 2.001622  | 2.68x10 <sup>-22</sup> | 9.57x10 <sup>-24</sup> |
| LHX1     | -2.192680 | 3.71x10 <sup>-03</sup> | 1.30x10 <sup>-03</sup> |
| TLR7     | 2.206422  | 2.18x10 <sup>-39</sup> | 1.88x10 <sup>-41</sup> |
| TSPAN11  | 1.165072  | 4.31x10 <sup>-13</sup> | 2.70x10 <sup>-14</sup> |
| PEBP4    | 1.268202  | 1.43x10 <sup>-05</sup> | 2.50x10 <sup>-06</sup> |
| HOXC12   | -2.202202 | 6.07x10 <sup>-08</sup> | 6.68x10 <sup>-09</sup> |
| FPR1     | 1.761969  | 1.11x10 <sup>-25</sup> | 3.26x10 <sup>-27</sup> |
| PDE4B    | 1.392050  | 8.43x10 <sup>-30</sup> | 1.89x10 <sup>-31</sup> |
| SLAMF7   | 2.192817  | 4.46x10 <sup>-39</sup> | 4.11x10 <sup>-41</sup> |
| BANK1    | 1.552036  | 8.31x10 <sup>-08</sup> | 9.35x10 <sup>-09</sup> |
| SPINK6   | -1.222006 | 1.65x10 <sup>-02</sup> | 7.30x10 <sup>-03</sup> |
| TNNT2    | -1.112537 | 1.14x10 <sup>-04</sup> | 2.52x10 <sup>-05</sup> |
| FETUB    | -1.514864 | 4.06x10 <sup>-04</sup> | 1.04x10 <sup>-04</sup> |
| FAM180B  | 1.076660  | 3.26x10 <sup>-02</sup> | 1.63x10 <sup>-02</sup> |
| TTYH1    | -2.313593 | 2.03x10 <sup>-02</sup> | 9.32x10 <sup>-03</sup> |
| LHFPL3   | -1.035678 | 2.22x10 <sup>-02</sup> | 1.04x10 <sup>-02</sup> |
| ZBP1     | 1.281380  | 4.74x10 <sup>-24</sup> | 1.52x10 <sup>-25</sup> |
| CXCR1    | 1.634961  | 9.13x10 <sup>-07</sup> | 1.23x10 <sup>-07</sup> |
| ZNF831   | 1.496554  | 3.25x10 <sup>-36</sup> | 4.48x10 <sup>-38</sup> |
| UGT2B17  | 1.885353  | 2.38x10 <sup>-04</sup> | 5.68x10 <sup>-05</sup> |
| LY86     | 1.957914  | 1.68x10 <sup>-40</sup> | 1.07x10 <sup>-42</sup> |
| CCNE1    | -1.676314 | 6.04x10 <sup>-06</sup> | 9.68x10 <sup>-07</sup> |
| CD5      | 1.248013  | 2.28x10 <sup>-27</sup> | 5.94x10 <sup>-29</sup> |
| FCGR3B   | 1.535355  | 2.05x10 <sup>-09</sup> | 1.85x10 <sup>-10</sup> |
| GPR65    | 1.848838  | 2.84x10 <sup>-46</sup> | 3.00x10 <sup>-49</sup> |
| TMEM151A | -1.119119 | 2.40x10 <sup>-04</sup> | 5.76x10 <sup>-05</sup> |
| KRT16    | -1.570499 | 1.31x10 <sup>-03</sup> | 3.93x10 <sup>-04</sup> |
| HK3      | 1.459451  | 1.19x10 <sup>-22</sup> | 4.17x10 <sup>-24</sup> |
| ADRB3    | 1.193506  | 1.25x10 <sup>-04</sup> | 2.78x10 <sup>-05</sup> |
| FAM78A   | 1.558277  | 1.28x10 <sup>-38</sup> | 1.29x10 <sup>-40</sup> |
| CYTIP    | 1.762683  | 1.50x10 <sup>-39</sup> | 1.21x10 <sup>-41</sup> |
| JUP      | -1.345322 | 8.51x10 <sup>-10</sup> | 7.31x10 <sup>-11</sup> |
| CD300A   | 1.496789  | 1.02x10 <sup>-37</sup> | 1.19x10 <sup>-39</sup> |
| JAKMIP1  | 1.671937  | 9.31x10 <sup>-31</sup> | 2.00x10 <sup>-32</sup> |
| ATP6V1C2 | -1.005276 | 1.90x10 <sup>-05</sup> | 3.43x10 <sup>-06</sup> |
| PDCD1    | 1.835002  | 3.51x10 <sup>-30</sup> | 7.70x10 <sup>-32</sup> |
| IGLL5    | 1.888097  | 9.92x10 <sup>-21</sup> | 3.91x10 <sup>-22</sup> |
| GFRA1    | 1.136650  | 8.11x10 <sup>-05</sup> | 1.71x10 <sup>-05</sup> |
| ST8SIA4  | 1.454286  | 1.72x10 <sup>-41</sup> | 9.25x10 <sup>-44</sup> |
| CTSK     | 1.028134  | 6.13x10 <sup>-14</sup> | 3.61x10 <sup>-15</sup> |
| GLYATL2  | 3.168515  | 1.62x10 <sup>-02</sup> | 7.12x10 <sup>-03</sup> |
| EPB41L3  | 1.063833  | 1.53x10 <sup>-20</sup> | 6.10x10 <sup>-22</sup> |
| NCF1     | 2.191319  | 1.62x10 <sup>-42</sup> | 7.31x10 <sup>-45</sup> |
| EOMES    | 1.707095  | 4.50x10 <sup>-26</sup> | 1.29x10 <sup>-27</sup> |
| ITGAM    | 1.581624  | 6.85x10 <sup>-28</sup> | 1.73x10 <sup>-29</sup> |
| ARRDC5   | 1.605800  | 2.14x10 <sup>-16</sup> | 1.08x10 <sup>-17</sup> |
| PNOC     | 2.228905  | 1.43x10 <sup>-26</sup> | 3.92x10 <sup>-28</sup> |
| LTF      | 1.842830  | 2.94x10 <sup>-07</sup> | 3.61x10 <sup>-08</sup> |
| GPR174   | 2.488683  | 7.47x10 <sup>-36</sup> | 1.06x10 <sup>-37</sup> |
| CELF2    | 1.299288  | 1.93x10 <sup>-26</sup> | 5.36x10 <sup>-28</sup> |
| FCGR1A   | 1.603130  | 1.94x10 <sup>-26</sup> | 5.42x10 <sup>-28</sup> |
| LIN28B   | -1.517367 | 9.20x10 <sup>-04</sup> | 2.63x10 <sup>-04</sup> |
| RORB     | 1.307348  | 1.40x10 <sup>-12</sup> | 9.13x10 <sup>-14</sup> |
| CSF3R    | 1.466817  | 2.64x10 <sup>-26</sup> | 7.50x10 <sup>-28</sup> |
| DPEP2    | 1.597368  | 7.39x10 <sup>-39</sup> | 7.19x10 <sup>-41</sup> |
| CNR1     | 1.098926  | 1.31x10 <sup>-05</sup> | 2.28x10 <sup>-06</sup> |
| KRT15    | -1.191276 | 1.98x10 <sup>-05</sup> | 3.58x10 <sup>-06</sup> |

Table SI. Continued.

| Gene      | logFC     | FDR                    | P-value                |
|-----------|-----------|------------------------|------------------------|
| KIR2DL4   | 1.343420  | 8.12x10 <sup>-11</sup> | 6.17x10 <sup>-12</sup> |
| DPPA5     | -2.111084 | 2.96x10 <sup>-02</sup> | 1.46x10 <sup>-02</sup> |
| LY6G6C    | -2.199338 | 3.44x10 <sup>-07</sup> | 4.29x10 <sup>-08</sup> |
| CD38      | 2.113745  | 1.96x10 <sup>-34</sup> | 3.20x10 <sup>-36</sup> |
| SP140     | 1.879812  | 4.49x10 <sup>-37</sup> | 5.78x10 <sup>-39</sup> |
| GLIPR2    | 1.153149  | 1.36x10 <sup>-32</sup> | 2.61x10 <sup>-34</sup> |
| DNASE1L3  | 1.645745  | 1.70x10 <sup>-13</sup> | 1.03x10 <sup>-14</sup> |
| LPXN      | 1.604225  | 6.49x10 <sup>-46</sup> | 8.81x10 <sup>-49</sup> |
| CRTAM     | 2.372953  | 7.56x10 <sup>-39</sup> | 7.40x10 <sup>-41</sup> |
| TRAF1     | 1.202739  | 2.44x10 <sup>-26</sup> | 6.90x10 <sup>-28</sup> |
| KLRD1     | 1.556313  | 1.44x10 <sup>-24</sup> | 4.51x10 <sup>-26</sup> |
| FGD3      | 1.096924  | 7.34x10 <sup>-26</sup> | 2.12x10 <sup>-27</sup> |
| PAX5      | 1.640225  | 1.89x10 <sup>-08</sup> | 1.92x10 <sup>-09</sup> |
| TNFRSF11B | -1.190138 | 3.99x10 <sup>-02</sup> | 2.07x10 <sup>-02</sup> |
| SLC38A4   | -2.101413 | 4.54x10 <sup>-02</sup> | 2.41x10 <sup>-02</sup> |
| NMUR1     | 1.119676  | 1.97x10 <sup>-12</sup> | 1.30x10 <sup>-13</sup> |
| ATP12A    | -1.697599 | 3.73x10 <sup>-02</sup> | 1.92x10 <sup>-02</sup> |
| PCDHGA12  | 1.040006  | 7.60x10 <sup>-12</sup> | 5.25x10 <sup>-13</sup> |
| PTCRA     | 1.730130  | 4.71x10 <sup>-26</sup> | 1.35x10 <sup>-27</sup> |
| GAB3      | 1.438645  | 2.60x10 <sup>-38</sup> | 2.71x10 <sup>-40</sup> |
| C2orf40   | 1.319757  | 1.66x10 <sup>-06</sup> | 2.36x10 <sup>-07</sup> |
| HEPFL1    | -1.177915 | 1.24x10 <sup>-02</sup> | 5.26x10 <sup>-03</sup> |
| TBC1D10C  | 2.047746  | 4.57x10 <sup>-38</sup> | 5.00x10 <sup>-40</sup> |
| SYNE1     | 1.017380  | 3.82x10 <sup>-16</sup> | 1.96x10 <sup>-17</sup> |
| ITGBL1    | 1.140093  | 4.98x10 <sup>-07</sup> | 6.42x10 <sup>-08</sup> |
| AMBP      | -1.659212 | 6.59x10 <sup>-04</sup> | 1.79x10 <sup>-04</sup> |
| CFAP74    | -1.145840 | 2.22x10 <sup>-03</sup> | 7.19x10 <sup>-04</sup> |
| FLI1      | 1.441516  | 6.40x10 <sup>-38</sup> | 7.18x10 <sup>-40</sup> |
| GPR141    | 1.989067  | 1.40x10 <sup>-34</sup> | 2.27x10 <sup>-36</sup> |
| FYB1      | 1.797063  | 7.10x10 <sup>-44</sup> | 2.34x10 <sup>-46</sup> |
| SLC18A2   | 1.257393  | 7.01x10 <sup>-05</sup> | 1.45x10 <sup>-05</sup> |
| GPBAR1    | 1.068248  | 3.62x10 <sup>-10</sup> | 2.97x10 <sup>-11</sup> |
| CD3G      | 1.915978  | 4.99x10 <sup>-38</sup> | 5.53x10 <sup>-40</sup> |
| NPPC      | 1.424199  | 3.06x10 <sup>-03</sup> | 1.04x10 <sup>-03</sup> |
| MYO1F     | 1.597314  | 2.13x10 <sup>-45</sup> | 3.97x10 <sup>-48</sup> |
| CRYBB1    | 1.212325  | 1.26x10 <sup>-23</sup> | 4.15x10 <sup>-25</sup> |
| SIGLEC7   | 1.825661  | 2.38x10 <sup>-37</sup> | 2.95x10 <sup>-39</sup> |
| CHI3L1    | 1.334256  | 3.60x10 <sup>-10</sup> | 2.95x10 <sup>-11</sup> |
| PLA2G2E   | -1.806380 | 2.88x10 <sup>-02</sup> | 1.41x10 <sup>-02</sup> |
| C1QC      | 1.876713  | 3.91x10 <sup>-39</sup> | 3.55x10 <sup>-41</sup> |
| RAC2      | 1.384052  | 1.17x10 <sup>-31</sup> | 2.40x10 <sup>-33</sup> |
| FGL2      | 1.794541  | 1.60x10 <sup>-32</sup> | 3.10x10 <sup>-34</sup> |
| ARHGAP45  | 1.082059  | 5.02x10 <sup>-22</sup> | 1.81x10 <sup>-23</sup> |
| CPE       | 1.006169  | 1.42x10 <sup>-05</sup> | 2.48x10 <sup>-06</sup> |
| SLC37A2   | 1.010210  | 1.25x10 <sup>-21</sup> | 4.64x10 <sup>-23</sup> |
| FOXJ1     | -1.300201 | 1.10x10 <sup>-06</sup> | 1.51x10 <sup>-07</sup> |
| C7        | 1.973213  | 1.97x10 <sup>-07</sup> | 2.36x10 <sup>-08</sup> |
| DTX1      | 1.289337  | 1.63x10 <sup>-07</sup> | 1.93x10 <sup>-08</sup> |
| FGR       | 1.371512  | 1.43x10 <sup>-37</sup> | 1.68x10 <sup>-39</sup> |
| CXorf21   | 1.726259  | 7.08x10 <sup>-42</sup> | 3.54x10 <sup>-44</sup> |
| CD80      | 1.575373  | 3.87x10 <sup>-28</sup> | 9.68x10 <sup>-30</sup> |
| TEKT2     | -1.018762 | 1.54x10 <sup>-03</sup> | 4.71x10 <sup>-04</sup> |
| NPY4R2    | 1.103087  | 1.41x10 <sup>-02</sup> | 6.06x10 <sup>-03</sup> |
| ABCD2     | 1.822108  | 2.67x10 <sup>-31</sup> | 5.57x10 <sup>-33</sup> |
| CFH       | 1.134436  | 1.05x10 <sup>-17</sup> | 4.85x10 <sup>-19</sup> |
| PI16      | 1.750709  | 1.26x10 <sup>-09</sup> | 1.11x10 <sup>-10</sup> |
| KLC3      | -1.238444 | 8.83x10 <sup>-06</sup> | 1.47x10 <sup>-06</sup> |
| MYH7B     | -1.637848 | 5.52x10 <sup>-03</sup> | 2.04x10 <sup>-03</sup> |
| TMEM156   | 1.867406  | 5.76x10 <sup>-33</sup> | 1.07x10 <sup>-34</sup> |

Table SI. Continued.

| Gene     | logFC     | FDR                    | P-value                |
|----------|-----------|------------------------|------------------------|
| HLA-DQA1 | 2.200685  | 1.12x10 <sup>-39</sup> | 8.86x10 <sup>-42</sup> |
| KLK14    | -1.650592 | 3.00x10 <sup>-04</sup> | 7.38x10 <sup>-05</sup> |
| IL18BP   | 1.448840  | 1.23x10 <sup>-33</sup> | 2.15x10 <sup>-35</sup> |
| DCSTAMP  | 1.749019  | 1.02x10 <sup>-16</sup> | 5.06x10 <sup>-18</sup> |
| CYSLTR2  | 1.639411  | 1.29x10 <sup>-33</sup> | 2.27x10 <sup>-35</sup> |
| MEF2C    | 1.138739  | 4.39x10 <sup>-20</sup> | 1.79x10 <sup>-21</sup> |
| GIMAP4   | 1.538719  | 5.30x10 <sup>-44</sup> | 1.63x10 <sup>-46</sup> |
| GZMM     | 1.881504  | 1.68x10 <sup>-32</sup> | 3.27x10 <sup>-34</sup> |
| OR52N4   | 1.525232  | 1.33x10 <sup>-07</sup> | 1.56x10 <sup>-08</sup> |
| EVL      | 1.108405  | 1.41x10 <sup>-23</sup> | 4.64x10 <sup>-25</sup> |
| DOCK8    | 1.601497  | 4.75x10 <sup>-37</sup> | 6.21x10 <sup>-39</sup> |
| MRC1     | 1.818379  | 3.74x10 <sup>-28</sup> | 9.32x10 <sup>-30</sup> |
| FCAR     | 1.550668  | 2.25x10 <sup>-13</sup> | 1.38x10 <sup>-14</sup> |
| EFEMP1   | 1.257731  | 1.64x10 <sup>-10</sup> | 1.29x10 <sup>-11</sup> |
| CFD      | 1.180797  | 1.02x10 <sup>-07</sup> | 1.17x10 <sup>-08</sup> |
| KCNH8    | -1.069561 | 3.72x10 <sup>-05</sup> | 7.17x10 <sup>-06</sup> |
| PLP1     | 1.272119  | 8.09x10 <sup>-06</sup> | 1.34x10 <sup>-06</sup> |
| HLA-DOB  | 1.919260  | 1.64x10 <sup>-26</sup> | 4.53x10 <sup>-28</sup> |
| TLR8     | 2.490244  | 1.58x10 <sup>-39</sup> | 1.30x10 <sup>-41</sup> |
| FCGR3A   | 1.697445  | 1.10x10 <sup>-25</sup> | 3.22x10 <sup>-27</sup> |
| NCKAP1L  | 1.960731  | 2.52x10 <sup>-45</sup> | 5.04x10 <sup>-48</sup> |
| C3       | 1.175475  | 8.86x10 <sup>-16</sup> | 4.66x10 <sup>-17</sup> |
| SLAMF1   | 1.808221  | 1.33x10 <sup>-40</sup> | 8.26x10 <sup>-43</sup> |
| LGALS7   | -2.281771 | 3.14x10 <sup>-04</sup> | 7.77x10 <sup>-05</sup> |
| CD22     | 2.847511  | 4.67x10 <sup>-21</sup> | 1.79x10 <sup>-22</sup> |
| SFMBT2   | 1.365562  | 1.91x10 <sup>-34</sup> | 3.11x10 <sup>-36</sup> |
| ARHGDIG  | -1.175742 | 3.42x10 <sup>-02</sup> | 1.73x10 <sup>-02</sup> |
| NLRC3    | 1.772344  | 8.20x10 <sup>-34</sup> | 1.41x10 <sup>-35</sup> |
| ANKRD55  | 1.439918  | 2.22x10 <sup>-15</sup> | 1.20x10 <sup>-16</sup> |
| CLEC6A   | 2.022000  | 3.76x10 <sup>-19</sup> | 1.61x10 <sup>-20</sup> |
| PLD4     | 1.667456  | 5.56x10 <sup>-20</sup> | 2.27x10 <sup>-21</sup> |
| PCSK1    | 1.270065  | 7.27x10 <sup>-03</sup> | 2.81x10 <sup>-03</sup> |
| COL19A1  | 1.445965  | 5.38x10 <sup>-08</sup> | 5.87x10 <sup>-09</sup> |
| CEBPE    | 1.894054  | 9.61x10 <sup>-26</sup> | 2.80x10 <sup>-27</sup> |
| ARHGAP40 | -1.472197 | 2.62x10 <sup>-04</sup> | 6.34x10 <sup>-05</sup> |
| HAMP     | 1.256559  | 1.47x10 <sup>-11</sup> | 1.04x10 <sup>-12</sup> |
| IGFALS   | -1.310530 | 1.86x10 <sup>-02</sup> | 8.39x10 <sup>-03</sup> |
| AICDA    | 1.589310  | 3.79x10 <sup>-05</sup> | 7.34x10 <sup>-06</sup> |
| APOH     | -3.215287 | 4.10x10 <sup>-03</sup> | 1.46x10 <sup>-03</sup> |
| CBFA2T3  | 1.041552  | 6.32x10 <sup>-13</sup> | 4.01x10 <sup>-14</sup> |
| DNAH14   | -1.002646 | 1.66x10 <sup>-06</sup> | 2.35x10 <sup>-07</sup> |
| B4GALNT4 | -1.077686 | 2.73x10 <sup>-02</sup> | 1.32x10 <sup>-02</sup> |
| CMA1     | 1.457340  | 3.18x10 <sup>-05</sup> | 6.05x10 <sup>-06</sup> |
| HS3ST6   | -3.215045 | 5.08x10 <sup>-03</sup> | 1.86x10 <sup>-03</sup> |
| FOXN1    | -1.405740 | 2.12x10 <sup>-06</sup> | 3.09x10 <sup>-07</sup> |
| ATP6V1B1 | -1.612189 | 2.84x10 <sup>-03</sup> | 9.54x10 <sup>-04</sup> |
| WFDC10A  | -1.288963 | 6.58x10 <sup>-03</sup> | 2.50x10 <sup>-03</sup> |
| IL4I1    | 1.360524  | 3.77x10 <sup>-25</sup> | 1.14x10 <sup>-26</sup> |
| ALOX5AP  | 1.623656  | 6.87x10 <sup>-35</sup> | 1.07x10 <sup>-36</sup> |
| FAM129C  | 2.672342  | 1.24x10 <sup>-10</sup> | 9.59x10 <sup>-12</sup> |
| MMP12    | 1.470591  | 8.48x10 <sup>-04</sup> | 2.39x10 <sup>-04</sup> |
| AFF3     | 1.470727  | 6.53x10 <sup>-09</sup> | 6.29x10 <sup>-10</sup> |
| CD52     | 2.278091  | 6.06x10 <sup>-40</sup> | 4.68x10 <sup>-42</sup> |
| HTR7     | 1.312866  | 4.25x10 <sup>-17</sup> | 2.05x10 <sup>-18</sup> |
| RASGRP4  | 1.277268  | 4.16x10 <sup>-30</sup> | 9.22x10 <sup>-32</sup> |
| DPT      | 1.622857  | 3.94x10 <sup>-13</sup> | 2.46x10 <sup>-14</sup> |
| GYPE     | 1.363692  | 8.34x10 <sup>-15</sup> | 4.68x10 <sup>-16</sup> |
| C1orf162 | 1.674500  | 4.13x10 <sup>-37</sup> | 5.23x10 <sup>-39</sup> |
| HRASLS   | -1.047969 | 8.67x10 <sup>-04</sup> | 2.45x10 <sup>-04</sup> |

Table SI. Continued.

| Gene      | logFC     | FDR                    | P-value                |
|-----------|-----------|------------------------|------------------------|
| TNFRSF13C | 2.205863  | 2.20x10 <sup>-10</sup> | 1.75x10 <sup>-11</sup> |
| SRPX      | 1.034193  | 3.64x10 <sup>-04</sup> | 9.22x10 <sup>-05</sup> |
| DRD2      | -1.490379 | 2.21x10 <sup>-03</sup> | 7.15x10 <sup>-04</sup> |
| FIBCD1    | -1.564495 | 1.92x10 <sup>-03</sup> | 6.09x10 <sup>-04</sup> |
| FAM107A   | 1.224936  | 8.07x10 <sup>-13</sup> | 5.15x10 <sup>-14</sup> |
| MUC15     | -1.059529 | 7.26x10 <sup>-04</sup> | 2.00x10 <sup>-04</sup> |
| LAPTM5    | 1.835349  | 4.39x10 <sup>-46</sup> | 5.02x10 <sup>-49</sup> |
| CD86      | 1.765777  | 2.36x10 <sup>-43</sup> | 8.93x10 <sup>-46</sup> |
| DOK2      | 1.716804  | 2.17x10 <sup>-44</sup> | 6.35x10 <sup>-47</sup> |
| CD69      | 1.978082  | 1.90x10 <sup>-39</sup> | 1.60x10 <sup>-41</sup> |
| WIF1      | -3.778738 | 2.95x10 <sup>-03</sup> | 9.97x10 <sup>-04</sup> |
| SCARA5    | 1.532090  | 3.20x10 <sup>-07</sup> | 3.96x10 <sup>-08</sup> |
| PRKCB     | 1.656760  | 8.47x10 <sup>-33</sup> | 1.61x10 <sup>-34</sup> |
| SLAMF8    | 1.845486  | 5.21x10 <sup>-40</sup> | 3.91x10 <sup>-42</sup> |
| MADCAM1   | 1.661738  | 2.42x10 <sup>-06</sup> | 3.57x10 <sup>-07</sup> |
| TMPRSS11E | -1.564444 | 1.32x10 <sup>-02</sup> | 5.61x10 <sup>-03</sup> |
| MAP1LC3C  | 1.150566  | 2.97x10 <sup>-12</sup> | 1.99x10 <sup>-13</sup> |
| FCRL4     | 2.193496  | 6.20x10 <sup>-18</sup> | 2.83x10 <sup>-19</sup> |
| LILRB4    | 1.929697  | 7.34x10 <sup>-39</sup> | 7.08x10 <sup>-41</sup> |
| STAP1     | 2.531072  | 6.94x10 <sup>-22</sup> | 2.52x10 <sup>-23</sup> |
| C1R       | 1.030046  | 6.46x10 <sup>-19</sup> | 2.81x10 <sup>-20</sup> |
| WISP2     | 1.083233  | 2.12x10 <sup>-02</sup> | 9.83x10 <sup>-03</sup> |
| CD19      | 2.362659  | 1.54x10 <sup>-17</sup> | 7.26x10 <sup>-19</sup> |
| SOCS1     | 1.083048  | 3.59x10 <sup>-15</sup> | 1.97x10 <sup>-16</sup> |
| GPR132    | 1.141164  | 9.80x10 <sup>-25</sup> | 3.04x10 <sup>-26</sup> |
| REN       | -1.357684 | 9.02x10 <sup>-06</sup> | 1.51x10 <sup>-06</sup> |
| RNF224    | -1.278366 | 3.96x10 <sup>-06</sup> | 6.12x10 <sup>-07</sup> |
| PARVG     | 1.701958  | 1.01x10 <sup>-45</sup> | 1.73x10 <sup>-48</sup> |
| AQP12B    | -3.834837 | 1.03x10 <sup>-02</sup> | 4.21x10 <sup>-03</sup> |
| COL14A1   | 1.429221  | 1.14x10 <sup>-10</sup> | 8.75x10 <sup>-12</sup> |
| IL2RA     | 1.818677  | 4.49x10 <sup>-37</sup> | 5.78x10 <sup>-39</sup> |
| FAM49A    | 1.465322  | 1.53x10 <sup>-35</sup> | 2.23x10 <sup>-37</sup> |
| TTL2      | -1.110876 | 6.80x10 <sup>-07</sup> | 8.94x10 <sup>-08</sup> |
| CXCL10    | 2.407995  | 5.37x10 <sup>-19</sup> | 2.32x10 <sup>-20</sup> |
| KCNA5     | 1.101077  | 1.49x10 <sup>-06</sup> | 2.09x10 <sup>-07</sup> |
| VGLL3     | 1.077468  | 2.10x10 <sup>-09</sup> | 1.90x10 <sup>-10</sup> |
| S100A2    | -1.305116 | 1.62x10 <sup>-04</sup> | 3.71x10 <sup>-05</sup> |
| MMP9      | 1.133457  | 3.08x10 <sup>-11</sup> | 2.24x10 <sup>-12</sup> |
| MYBPHL    | -1.586947 | 1.17x10 <sup>-04</sup> | 2.57x10 <sup>-05</sup> |
| TH        | -1.358437 | 1.60x10 <sup>-03</sup> | 4.92x10 <sup>-04</sup> |
| PGLYRP1   | 1.219794  | 8.34x10 <sup>-04</sup> | 2.34x10 <sup>-04</sup> |
| TIGIT     | 1.939637  | 3.60x10 <sup>-36</sup> | 5.01x10 <sup>-38</sup> |
| CD36      | 1.157612  | 4.66x10 <sup>-16</sup> | 2.41x10 <sup>-17</sup> |
| NHSL2     | 1.015131  | 1.26x10 <sup>-12</sup> | 8.20x10 <sup>-14</sup> |
| ZFP42     | -1.931793 | 7.73x10 <sup>-03</sup> | 3.01x10 <sup>-03</sup> |
| ADA2      | 1.731828  | 1.58x10 <sup>-39</sup> | 1.30x10 <sup>-41</sup> |
| ADH1B     | 2.000849  | 8.51x10 <sup>-10</sup> | 7.31x10 <sup>-11</sup> |
| ARHGAP9   | 1.895381  | 2.84x10 <sup>-46</sup> | 3.05x10 <sup>-49</sup> |
| TIMD4     | 2.099064  | 9.84x10 <sup>-16</sup> | 5.19x10 <sup>-17</sup> |
| BCL2A1    | 1.643165  | 7.99x10 <sup>-29</sup> | 1.95x10 <sup>-30</sup> |
| COL11A2   | -3.329661 | 8.22x10 <sup>-03</sup> | 3.24x10 <sup>-03</sup> |
| SAMD3     | 1.412280  | 3.24x10 <sup>-29</sup> | 7.67x10 <sup>-31</sup> |
| GIMAP7    | 1.551179  | 2.03x10 <sup>-34</sup> | 3.34x10 <sup>-36</sup> |
| ARTN      | -1.085480 | 5.64x10 <sup>-05</sup> | 1.14x10 <sup>-05</sup> |
| SLC35D3   | -1.689299 | 1.35x10 <sup>-03</sup> | 4.07x10 <sup>-04</sup> |
| CCL2      | 1.144204  | 4.22x10 <sup>-17</sup> | 2.03x10 <sup>-18</sup> |
| TYROBP    | 1.686268  | 5.90x10 <sup>-38</sup> | 6.58x10 <sup>-40</sup> |
| MSR1      | 1.536949  | 7.71x10 <sup>-27</sup> | 2.06x10 <sup>-28</sup> |
| ANGPTL1   | 1.093057  | 4.66x10 <sup>-08</sup> | 5.02x10 <sup>-09</sup> |

Table SI. Continued.

| Gene       | logFC     | FDR                    | P-value                |
|------------|-----------|------------------------|------------------------|
| PCDH10     | 1.116177  | 7.58x10 <sup>-04</sup> | 2.09x10 <sup>-04</sup> |
| SHISAL2A   | 1.953143  | 6.09x10 <sup>-22</sup> | 2.21x10 <sup>-23</sup> |
| WAS        | 2.010798  | 1.11x10 <sup>-48</sup> | 3.18x10 <sup>-52</sup> |
| SDS        | 1.280619  | 4.48x10 <sup>-21</sup> | 1.72x10 <sup>-22</sup> |
| PPP1R16B   | 1.743242  | 1.23x10 <sup>-30</sup> | 2.67x10 <sup>-32</sup> |
| PIK3R5     | 1.649843  | 3.94x10 <sup>-40</sup> | 2.82x10 <sup>-42</sup> |
| DLX3       | -3.123538 | 1.13x10 <sup>-07</sup> | 1.30x10 <sup>-08</sup> |
| KLRG2      | -1.851756 | 9.93x10 <sup>-07</sup> | 1.35x10 <sup>-07</sup> |
| PPP2R2C    | -1.273307 | 1.92x10 <sup>-03</sup> | 6.09x10 <sup>-04</sup> |
| HAPLN3     | 1.139914  | 5.95x10 <sup>-18</sup> | 2.71x10 <sup>-19</sup> |
| P2RY13     | 2.079924  | 4.93x10 <sup>-40</sup> | 3.63x10 <sup>-42</sup> |
| CASS4      | 1.594394  | 1.84x10 <sup>-37</sup> | 2.21x10 <sup>-39</sup> |
| HLA-DRB1   | 1.661247  | 1.42x10 <sup>-33</sup> | 2.49x10 <sup>-35</sup> |
| IL7R       | 1.783631  | 1.58x10 <sup>-33</sup> | 2.82x10 <sup>-35</sup> |
| CCR3       | 1.008144  | 5.37x10 <sup>-09</sup> | 5.12x10 <sup>-10</sup> |
| MAGEA11    | -2.147272 | 9.38x10 <sup>-08</sup> | 1.06x10 <sup>-08</sup> |
| CERS3      | -1.055193 | 1.24x10 <sup>-03</sup> | 3.71x10 <sup>-04</sup> |
| LAMP3      | 1.104043  | 8.79x10 <sup>-15</sup> | 4.94x10 <sup>-16</sup> |
| CAMK4      | 1.351363  | 6.70x10 <sup>-24</sup> | 2.16x10 <sup>-25</sup> |
| PLA2G2A    | 1.051045  | 2.43x10 <sup>-03</sup> | 8.00x10 <sup>-04</sup> |
| LILRA1     | 1.619858  | 1.63x10 <sup>-34</sup> | 2.64x10 <sup>-36</sup> |
| MYBPH      | 3.754181  | 1.09x10 <sup>-06</sup> | 1.49x10 <sup>-07</sup> |
| ATP8B4     | 1.259922  | 3.66x10 <sup>-29</sup> | 8.71x10 <sup>-31</sup> |
| PPARGC1A   | -1.078895 | 1.54x10 <sup>-03</sup> | 4.72x10 <sup>-04</sup> |
| GPR25      | 1.828708  | 7.23x10 <sup>-16</sup> | 3.76x10 <sup>-17</sup> |
| CSAG3      | -1.439450 | 2.21x10 <sup>-02</sup> | 1.03x10 <sup>-02</sup> |
| IL16       | 2.018428  | 3.43x10 <sup>-40</sup> | 2.43x10 <sup>-42</sup> |
| NXPH4      | -1.461287 | 5.27x10 <sup>-04</sup> | 1.40x10 <sup>-04</sup> |
| VPREB3     | 3.241995  | 1.70x10 <sup>-14</sup> | 9.65x10 <sup>-16</sup> |
| BMP7       | -1.847460 | 6.41x10 <sup>-08</sup> | 7.09x10 <sup>-09</sup> |
| JAK3       | 1.353335  | 1.07x10 <sup>-26</sup> | 2.89x10 <sup>-28</sup> |
| ITLN2      | -1.133053 | 6.35x10 <sup>-03</sup> | 2.40x10 <sup>-03</sup> |
| CTRC       | -1.409832 | 1.48x10 <sup>-02</sup> | 6.44x10 <sup>-03</sup> |
| MARCO      | 1.248722  | 3.34x10 <sup>-06</sup> | 5.07x10 <sup>-07</sup> |
| CLGN       | -1.055740 | 8.89x10 <sup>-03</sup> | 3.55x10 <sup>-03</sup> |
| LYVE1      | 1.275347  | 9.36x10 <sup>-12</sup> | 6.51x10 <sup>-13</sup> |
| TLR1       | 1.587815  | 4.80x10 <sup>-32</sup> | 9.63x10 <sup>-34</sup> |
| AL645941.2 | 1.931753  | 1.09x10 <sup>-20</sup> | 4.29x10 <sup>-22</sup> |
| DEFB126    | -1.509558 | 7.53x10 <sup>-05</sup> | 1.57x10 <sup>-05</sup> |
| KLHL6      | 2.051181  | 5.09x10 <sup>-41</sup> | 2.84x10 <sup>-43</sup> |
| IL27       | 1.061874  | 3.61x10 <sup>-17</sup> | 1.73x10 <sup>-18</sup> |
| NPY4R      | 1.320568  | 1.76x10 <sup>-02</sup> | 7.86x10 <sup>-03</sup> |
| GZMK       | 2.762698  | 3.11x10 <sup>-40</sup> | 2.15x10 <sup>-42</sup> |
| CCR8       | 1.751977  | 4.25x10 <sup>-29</sup> | 1.01x10 <sup>-30</sup> |
| MMP25      | 1.370831  | 6.79x10 <sup>-28</sup> | 1.71x10 <sup>-29</sup> |
| GZMA       | 1.999881  | 3.13x10 <sup>-33</sup> | 5.70x10 <sup>-35</sup> |
| GPR142     | 1.054888  | 4.95x10 <sup>-05</sup> | 9.90x10 <sup>-06</sup> |
| IGDCC3     | -3.348529 | 4.20x10 <sup>-02</sup> | 2.21x10 <sup>-02</sup> |
| AKNA       | 1.150850  | 1.79x10 <sup>-25</sup> | 5.29x10 <sup>-27</sup> |
| RSPO2      | 1.098199  | 1.54x10 <sup>-06</sup> | 2.16x10 <sup>-07</sup> |
| LAG3       | 1.780163  | 2.92x10 <sup>-27</sup> | 7.68x10 <sup>-29</sup> |
| TMEM88B    | -1.277982 | 1.65x10 <sup>-03</sup> | 5.11x10 <sup>-04</sup> |
| CPNE5      | 1.275842  | 4.77x10 <sup>-19</sup> | 2.05x10 <sup>-20</sup> |
| CLEC9A     | 2.097590  | 4.19x10 <sup>-34</sup> | 7.10x10 <sup>-36</sup> |
| TREM1      | 1.098454  | 6.30x10 <sup>-07</sup> | 8.23x10 <sup>-08</sup> |
| SHISA3     | 1.937392  | 3.80x10 <sup>-06</sup> | 5.82x10 <sup>-07</sup> |
| ASCL5      | -1.334702 | 5.05x10 <sup>-05</sup> | 1.01x10 <sup>-05</sup> |
| RCOR2      | -1.253259 | 5.53x10 <sup>-12</sup> | 3.77x10 <sup>-13</sup> |
| SNAP91     | 1.154150  | 7.84x10 <sup>-04</sup> | 2.18x10 <sup>-04</sup> |

Table SI. Continued.

| Gene     | logFC     | FDR                    | P-value                |
|----------|-----------|------------------------|------------------------|
| HCLS1    | 1.774029  | 7.37x10 <sup>-47</sup> | 4.22x10 <sup>-50</sup> |
| PRF1     | 1.644192  | 4.53x10 <sup>-31</sup> | 9.66x10 <sup>-33</sup> |
| CD5L     | 1.929828  | 4.24x10 <sup>-04</sup> | 1.10x10 <sup>-04</sup> |
| CDKN2A   | -1.289004 | 1.58x10 <sup>-02</sup> | 6.95x10 <sup>-03</sup> |
| FOXO6    | -1.283680 | 1.70x10 <sup>-08</sup> | 1.72x10 <sup>-09</sup> |
| HGF      | 1.264263  | 1.34x10 <sup>-16</sup> | 6.67x10 <sup>-18</sup> |
| CORO1A   | 1.965436  | 3.66x10 <sup>-42</sup> | 1.75x10 <sup>-44</sup> |
| SFTA2    | -1.080595 | 2.56x10 <sup>-02</sup> | 1.23x10 <sup>-02</sup> |
| ALX1     | -1.506893 | 3.86x10 <sup>-02</sup> | 2.00x10 <sup>-02</sup> |
| PASD1    | -1.658025 | 1.83x10 <sup>-03</sup> | 5.77x10 <sup>-04</sup> |
| AQP9     | 1.668270  | 9.18x10 <sup>-10</sup> | 7.92x10 <sup>-11</sup> |
| CD72     | 1.766076  | 1.55x10 <sup>-37</sup> | 1.83x10 <sup>-39</sup> |
| GPR171   | 2.013628  | 3.75x10 <sup>-38</sup> | 4.02x10 <sup>-40</sup> |
| C1QL4    | -2.033158 | 1.78x10 <sup>-05</sup> | 3.19x10 <sup>-06</sup> |
| AQP12A   | -3.844428 | 3.19x10 <sup>-02</sup> | 1.59x10 <sup>-02</sup> |
| MAGEC2   | -1.762022 | 1.92x10 <sup>-02</sup> | 8.73x10 <sup>-03</sup> |
| KLRB1    | 1.730431  | 1.08x10 <sup>-35</sup> | 1.55x10 <sup>-37</sup> |
| TAGAP    | 2.086972  | 7.39x10 <sup>-46</sup> | 1.21x10 <sup>-48</sup> |
| CRCT1    | -1.003689 | 3.81x10 <sup>-04</sup> | 9.74x10 <sup>-05</sup> |
| APOA1    | -2.417737 | 3.32x10 <sup>-02</sup> | 1.67x10 <sup>-02</sup> |
| APOBEC3H | 1.921064  | 8.98x10 <sup>-35</sup> | 1.42x10 <sup>-36</sup> |
| SIRPB2   | 1.595557  | 2.97x10 <sup>-31</sup> | 6.27x10 <sup>-33</sup> |
| CCDC80   | 1.261624  | 4.76x10 <sup>-10</sup> | 3.96x10 <sup>-11</sup> |
| VNN2     | 1.057228  | 4.24x10 <sup>-14</sup> | 2.48x10 <sup>-15</sup> |
| HLA-DMA  | 1.490982  | 1.56x10 <sup>-28</sup> | 3.85x10 <sup>-30</sup> |
| CD40LG   | 1.955800  | 4.15x10 <sup>-34</sup> | 7.01x10 <sup>-36</sup> |
| P2RY8    | 2.279072  | 3.38x10 <sup>-33</sup> | 6.18x10 <sup>-35</sup> |
| MS4A6A   | 1.877877  | 9.51x10 <sup>-43</sup> | 4.01x10 <sup>-45</sup> |
| LAIR1    | 1.764661  | 6.49x10 <sup>-46</sup> | 8.67x10 <sup>-49</sup> |
| GPR84    | 1.545809  | 3.30x10 <sup>-19</sup> | 1.40x10 <sup>-20</sup> |
| AOAH     | 2.000381  | 4.93x10 <sup>-40</sup> | 3.63x10 <sup>-42</sup> |
| NFAM1    | 1.592364  | 2.40x10 <sup>-37</sup> | 2.99x10 <sup>-39</sup> |
| LTA      | 2.052880  | 7.56x10 <sup>-37</sup> | 9.95x10 <sup>-39</sup> |
| BPIFB2   | -4.689123 | 9.36x10 <sup>-03</sup> | 3.77x10 <sup>-03</sup> |
| F2       | -2.716739 | 5.33x10 <sup>-05</sup> | 1.07x10 <sup>-05</sup> |
| SELPLG   | 1.561493  | 1.25x10 <sup>-41</sup> | 6.62x10 <sup>-44</sup> |
| TMEM255A | 1.632808  | 1.97x10 <sup>-23</sup> | 6.60x10 <sup>-25</sup> |
| FCGR2A   | 1.363543  | 4.45x10 <sup>-29</sup> | 1.07x10 <sup>-30</sup> |
| GPR18    | 1.791984  | 4.07x10 <sup>-30</sup> | 8.98x10 <sup>-32</sup> |
| GPR37    | -1.722368 | 1.42x10 <sup>-04</sup> | 3.20x10 <sup>-05</sup> |
| LILRA2   | 1.606586  | 3.20x10 <sup>-26</sup> | 9.09x10 <sup>-28</sup> |
| CPA3     | 1.375989  | 2.07x10 <sup>-10</sup> | 1.64x10 <sup>-11</sup> |
| SLC2A5   | 1.192518  | 2.93x10 <sup>-22</sup> | 1.05x10 <sup>-23</sup> |
| LIMD2    | 1.111598  | 1.44x10 <sup>-17</sup> | 6.78x10 <sup>-19</sup> |
| IPCEF1   | 1.674758  | 1.02x10 <sup>-31</sup> | 2.08x10 <sup>-33</sup> |
| HAVCR2   | 1.704665  | 5.44x10 <sup>-41</sup> | 3.15x10 <sup>-43</sup> |
| RGS13    | 3.448580  | 5.30x10 <sup>-11</sup> | 3.97x10 <sup>-12</sup> |
| TRIM22   | 1.521753  | 3.94x10 <sup>-33</sup> | 7.27x10 <sup>-35</sup> |
| KRT12    | -2.530733 | 1.08x10 <sup>-02</sup> | 4.46x10 <sup>-03</sup> |
| APOBEC3D | 1.080512  | 7.27x10 <sup>-21</sup> | 2.84x10 <sup>-22</sup> |
| CCL4     | 1.788268  | 2.71x10 <sup>-33</sup> | 4.91x10 <sup>-35</sup> |
| JAML     | 1.702165  | 3.88x10 <sup>-39</sup> | 3.50x10 <sup>-41</sup> |
| DOC2A    | -1.118397 | 1.83x10 <sup>-02</sup> | 8.23x10 <sup>-03</sup> |
| MILR1    | 1.357502  | 1.23x10 <sup>-31</sup> | 2.53x10 <sup>-33</sup> |
| OSM      | 1.269448  | 6.21x10 <sup>-08</sup> | 6.86x10 <sup>-09</sup> |
| SPTBN5   | -1.012856 | 4.60x10 <sup>-05</sup> | 9.15x10 <sup>-06</sup> |
| CD300C   | 1.562291  | 8.25x10 <sup>-32</sup> | 1.68x10 <sup>-33</sup> |
| EVI2A    | 1.756660  | 5.70x10 <sup>-46</sup> | 6.93x10 <sup>-49</sup> |
| CX3CL1   | 1.426190  | 7.12x10 <sup>-11</sup> | 5.37x10 <sup>-12</sup> |

Table SI. Continued.

| Gene       | logFC     | FDR                    | P-value                |
|------------|-----------|------------------------|------------------------|
| SASH3      | 2.172311  | 1.53x10 <sup>-46</sup> | 1.42x10 <sup>-49</sup> |
| RNF225     | -1.395737 | 2.47x10 <sup>-05</sup> | 4.59x10 <sup>-06</sup> |
| FPR2       | 1.772429  | 6.05x10 <sup>-15</sup> | 3.36x10 <sup>-16</sup> |
| PVALB      | 1.476070  | 1.32x10 <sup>-11</sup> | 9.26x10 <sup>-13</sup> |
| SFRP1      | 1.331060  | 3.38x10 <sup>-07</sup> | 4.21x10 <sup>-08</sup> |
| CEACAM21   | 1.531160  | 1.61x10 <sup>-35</sup> | 2.35x10 <sup>-37</sup> |
| CCL18      | 2.149757  | 4.33x10 <sup>-17</sup> | 2.09x10 <sup>-18</sup> |
| MS4A7      | 1.836205  | 7.65x10 <sup>-42</sup> | 3.88x10 <sup>-44</sup> |
| MPEG1      | 2.064700  | 1.62x10 <sup>-42</sup> | 7.31x10 <sup>-45</sup> |
| GIMAP2     | 1.074612  | 8.43x10 <sup>-28</sup> | 2.14x10 <sup>-29</sup> |
| LARGE2     | -1.157247 | 7.05x10 <sup>-06</sup> | 1.15x10 <sup>-06</sup> |
| ITGAD      | 1.339228  | 8.37x10 <sup>-15</sup> | 4.70x10 <sup>-16</sup> |
| FUT7       | 1.467162  | 5.21x10 <sup>-19</sup> | 2.25x10 <sup>-20</sup> |
| CD300LB    | 1.537340  | 3.14x10 <sup>-25</sup> | 9.43x10 <sup>-27</sup> |
| HLA-DPA1   | 2.033238  | 6.64x10 <sup>-38</sup> | 7.50x10 <sup>-40</sup> |
| ACSM5      | 1.556800  | 8.47x10 <sup>-24</sup> | 2.75x10 <sup>-25</sup> |
| TMEM105    | -1.205227 | 9.98x10 <sup>-08</sup> | 1.14x10 <sup>-08</sup> |
| RGS9       | 1.037820  | 3.65x10 <sup>-08</sup> | 3.88x10 <sup>-09</sup> |
| RSPO1      | 1.123363  | 2.53x10 <sup>-10</sup> | 2.03x10 <sup>-11</sup> |
| ERVMER34-1 | -1.242182 | 1.31x10 <sup>-07</sup> | 1.53x10 <sup>-08</sup> |
| HCAR3      | 1.420221  | 1.03x10 <sup>-04</sup> | 2.23x10 <sup>-05</sup> |
| CD163      | 1.848772  | 4.95x10 <sup>-31</sup> | 1.06x10 <sup>-32</sup> |
| IL21R      | 2.133417  | 2.09x10 <sup>-39</sup> | 1.78x10 <sup>-41</sup> |
| NLRP3      | 1.512544  | 4.75x10 <sup>-32</sup> | 9.51x10 <sup>-34</sup> |
| ICAM2      | 1.142353  | 7.81x10 <sup>-16</sup> | 4.09x10 <sup>-17</sup> |
| CCL7       | 1.341152  | 2.55x10 <sup>-03</sup> | 8.47x10 <sup>-04</sup> |
| ESR1       | 1.618626  | 6.61x10 <sup>-26</sup> | 1.91x10 <sup>-27</sup> |
| CD209      | 1.709629  | 5.01x10 <sup>-28</sup> | 1.26x10 <sup>-29</sup> |
| TLX1       | -1.062992 | 2.26x10 <sup>-02</sup> | 1.06x10 <sup>-02</sup> |
| FERMT3     | 1.122582  | 3.70x10 <sup>-27</sup> | 9.81x10 <sup>-29</sup> |
| SCRT1      | -2.220208 | 1.07x10 <sup>-04</sup> | 2.33x10 <sup>-05</sup> |
| KRT6A      | -1.430071 | 2.47x10 <sup>-02</sup> | 1.17x10 <sup>-02</sup> |
| MS4A15     | -1.089602 | 2.26x10 <sup>-02</sup> | 1.06x10 <sup>-02</sup> |
| HLA-DRA    | 1.843774  | 1.83x10 <sup>-39</sup> | 1.53x10 <sup>-41</sup> |
| WARS       | 1.622717  | 5.74x10 <sup>-17</sup> | 2.79x10 <sup>-18</sup> |
| CLEC4C     | 1.124703  | 1.99x10 <sup>-13</sup> | 1.22x10 <sup>-14</sup> |
| CFP        | 1.614335  | 4.54x10 <sup>-30</sup> | 1.01x10 <sup>-31</sup> |
| FASLG      | 1.943977  | 3.08x10 <sup>-28</sup> | 7.64x10 <sup>-30</sup> |
| WSCD2      | 1.256441  | 5.40x10 <sup>-06</sup> | 8.57x10 <sup>-07</sup> |
| IL36RN     | -1.971222 | 2.99x10 <sup>-02</sup> | 1.48x10 <sup>-02</sup> |
| FCMR       | 2.180253  | 9.73x10 <sup>-30</sup> | 2.20x10 <sup>-31</sup> |
| CLECL1     | 2.380692  | 1.11x10 <sup>-35</sup> | 1.59x10 <sup>-37</sup> |
| PTPRC      | 2.296039  | 1.67x10 <sup>-45</sup> | 2.98x10 <sup>-48</sup> |
| RCSD1      | 1.756644  | 7.86x10 <sup>-41</sup> | 4.66x10 <sup>-43</sup> |
| GFI1       | 1.155492  | 9.37x10 <sup>-26</sup> | 2.73x10 <sup>-27</sup> |
| GRIN3A     | 1.187544  | 6.49x10 <sup>-23</sup> | 2.25x10 <sup>-24</sup> |
| C16orf54   | 1.779980  | 1.78x10 <sup>-35</sup> | 2.63x10 <sup>-37</sup> |
| PNPLA3     | -1.195096 | 4.74x10 <sup>-04</sup> | 1.24x10 <sup>-04</sup> |
| GP1BA      | 1.372099  | 1.81x10 <sup>-07</sup> | 2.15x10 <sup>-08</sup> |
| TMEM71     | 1.105177  | 1.33x10 <sup>-25</sup> | 3.89x10 <sup>-27</sup> |
| PKP1       | -1.373035 | 3.05x10 <sup>-04</sup> | 7.55x10 <sup>-05</sup> |
| TMEM119    | 1.143042  | 4.84x10 <sup>-13</sup> | 3.04x10 <sup>-14</sup> |
| TREML1     | 1.518502  | 1.19x10 <sup>-23</sup> | 3.92x10 <sup>-25</sup> |
| CD8A       | 2.295920  | 8.20x10 <sup>-34</sup> | 1.41x10 <sup>-35</sup> |
| LCP1       | 1.957051  | 3.55x10 <sup>-45</sup> | 7.62x10 <sup>-48</sup> |
| TEX15      | -1.372771 | 1.27x10 <sup>-02</sup> | 5.40x10 <sup>-03</sup> |
| SIGLEC9    | 1.547969  | 6.87x10 <sup>-35</sup> | 1.07x10 <sup>-36</sup> |
| MMRN1      | 1.406362  | 6.32x10 <sup>-11</sup> | 4.75x10 <sup>-12</sup> |
| DSC3       | -1.086469 | 2.34x10 <sup>-02</sup> | 1.10x10 <sup>-02</sup> |

Table SI. Continued.

| Gene     | logFC     | FDR                    | P-value                |
|----------|-----------|------------------------|------------------------|
| RGS7     | -1.330782 | 2.99x10 <sup>-02</sup> | 1.48x10 <sup>-02</sup> |
| OGN      | 1.920019  | 4.63x10 <sup>-06</sup> | 7.25x10 <sup>-07</sup> |
| FOXH1    | -1.494920 | 2.78x10 <sup>-03</sup> | 9.32x10 <sup>-04</sup> |
| TCF23    | 1.301295  | 4.05x10 <sup>-03</sup> | 1.44x10 <sup>-03</sup> |
| TTC24    | 2.232880  | 7.22x10 <sup>-24</sup> | 2.34x10 <sup>-25</sup> |
| LYL1     | 1.251884  | 6.89x10 <sup>-20</sup> | 2.83x10 <sup>-21</sup> |
| CD2      | 2.048136  | 2.90x10 <sup>-43</sup> | 1.16x10 <sup>-45</sup> |
| PPP1R1B  | -1.555855 | 2.70x10 <sup>-02</sup> | 1.31x10 <sup>-02</sup> |
| PRR29    | 1.071985  | 7.76x10 <sup>-04</sup> | 2.16x10 <sup>-04</sup> |
| GJB6     | -1.478887 | 4.55x10 <sup>-05</sup> | 9.04x10 <sup>-06</sup> |
| GUCY1A1  | 1.170292  | 1.28x10 <sup>-14</sup> | 7.26x10 <sup>-16</sup> |
| STAT4    | 1.384082  | 4.18x10 <sup>-36</sup> | 5.86x10 <sup>-38</sup> |
| CLEC7A   | 1.592477  | 2.33x10 <sup>-37</sup> | 2.86x10 <sup>-39</sup> |
| BACH2    | 1.277571  | 4.74x10 <sup>-08</sup> | 5.12x10 <sup>-09</sup> |
| CD53     | 2.112336  | 5.42x10 <sup>-49</sup> | 3.87x10 <sup>-53</sup> |
| CHD5     | -1.006747 | 1.77x10 <sup>-02</sup> | 7.89x10 <sup>-03</sup> |
| TREM2    | 1.642574  | 2.50x10 <sup>-26</sup> | 7.07x10 <sup>-28</sup> |
| SAMD9L   | 1.171733  | 3.88x10 <sup>-21</sup> | 1.48x10 <sup>-22</sup> |
| ASB2     | 1.053532  | 6.95x10 <sup>-15</sup> | 3.88x10 <sup>-16</sup> |
| ZCCHC18  | 1.084009  | 5.58x10 <sup>-14</sup> | 3.28x10 <sup>-15</sup> |
| HPGDS    | 1.505994  | 1.46x10 <sup>-12</sup> | 9.59x10 <sup>-14</sup> |
| PRSS50   | -3.221868 | 1.84x10 <sup>-03</sup> | 5.81x10 <sup>-04</sup> |
| GAS7     | 1.107859  | 9.31x10 <sup>-17</sup> | 4.60x10 <sup>-18</sup> |
| ITM2A    | 1.209701  | 8.01x10 <sup>-23</sup> | 2.79x10 <sup>-24</sup> |
| FAM163A  | 1.278094  | 8.34x10 <sup>-04</sup> | 2.34x10 <sup>-04</sup> |
| IL21     | 2.434698  | 9.82x10 <sup>-19</sup> | 4.30x10 <sup>-20</sup> |
| KLRG1    | 1.160383  | 3.92x10 <sup>-22</sup> | 1.41x10 <sup>-23</sup> |
| NCR3     | 2.150937  | 1.74x10 <sup>-29</sup> | 4.01x10 <sup>-31</sup> |
| CLIC2    | 1.244560  | 9.78x10 <sup>-31</sup> | 2.11x10 <sup>-32</sup> |
| FCER2    | 3.302108  | 7.43x10 <sup>-16</sup> | 3.87x10 <sup>-17</sup> |
| CSF2RA   | 1.238673  | 1.09x10 <sup>-27</sup> | 2.77x10 <sup>-29</sup> |
| CD79B    | 3.117178  | 1.58x10 <sup>-29</sup> | 3.63x10 <sup>-31</sup> |
| GIMAP8   | 1.354140  | 2.79x10 <sup>-34</sup> | 4.64x10 <sup>-36</sup> |
| CD27     | 2.369715  | 8.90x10 <sup>-38</sup> | 1.03x10 <sup>-39</sup> |
| MAGEA6   | -1.576074 | 3.47x10 <sup>-05</sup> | 6.65x10 <sup>-06</sup> |
| CXCR5    | 3.349192  | 8.57x10 <sup>-23</sup> | 2.99x10 <sup>-24</sup> |
| HOXD13   | -1.847737 | 1.09x10 <sup>-02</sup> | 4.50x10 <sup>-03</sup> |
| TCF21    | 1.046990  | 1.65x10 <sup>-11</sup> | 1.18x10 <sup>-12</sup> |
| CHRDL1   | 1.509802  | 1.90x10 <sup>-07</sup> | 2.28x10 <sup>-08</sup> |
| C5AR1    | 1.441385  | 3.46x10 <sup>-27</sup> | 9.12x10 <sup>-29</sup> |
| FCRL1    | 3.309689  | 1.61x10 <sup>-17</sup> | 7.63x10 <sup>-19</sup> |
| ACTL8    | -2.071992 | 3.84x10 <sup>-04</sup> | 9.82x10 <sup>-05</sup> |
| TMC8     | 1.424904  | 9.99x10 <sup>-27</sup> | 2.69x10 <sup>-28</sup> |
| C6orf15  | -2.901781 | 3.47x10 <sup>-03</sup> | 1.20x10 <sup>-03</sup> |
| TAF7L    | -1.044629 | 2.79x10 <sup>-02</sup> | 1.36x10 <sup>-02</sup> |
| ASB4     | -1.260932 | 1.38x10 <sup>-05</sup> | 2.40x10 <sup>-06</sup> |
| KRTAP4-1 | -1.329218 | 8.49x10 <sup>-05</sup> | 1.79x10 <sup>-05</sup> |
| HSD11B1  | 1.490135  | 2.11x10 <sup>-24</sup> | 6.69x10 <sup>-26</sup> |
| KCNK13   | 1.184440  | 2.22x10 <sup>-29</sup> | 5.18x10 <sup>-31</sup> |
| BAMBI    | -1.145285 | 6.81x10 <sup>-06</sup> | 1.11x10 <sup>-06</sup> |
| NKPD1    | -1.260714 | 2.65x10 <sup>-08</sup> | 2.75x10 <sup>-09</sup> |
| IFIT2    | 1.040903  | 2.86x10 <sup>-17</sup> | 1.37x10 <sup>-18</sup> |
| CCL22    | 1.864743  | 9.30x10 <sup>-30</sup> | 2.09x10 <sup>-31</sup> |
| CD226    | 1.237255  | 1.24x10 <sup>-37</sup> | 1.46x10 <sup>-39</sup> |
| TNXB     | 1.304877  | 1.91x10 <sup>-05</sup> | 3.45x10 <sup>-06</sup> |
| PTGFR    | 1.412131  | 1.44x10 <sup>-13</sup> | 8.71x10 <sup>-15</sup> |
| KCNA3    | 2.331687  | 1.30x10 <sup>-35</sup> | 1.88x10 <sup>-37</sup> |
| STRA8    | -2.077569 | 2.90x10 <sup>-03</sup> | 9.78x10 <sup>-04</sup> |
| FGF19    | -2.153957 | 5.53x10 <sup>-05</sup> | 1.12x10 <sup>-05</sup> |



Table SI. Continued.

| Gene     | logFC     | FDR                    | P-value                |
|----------|-----------|------------------------|------------------------|
| TMIGD2   | 1.469741  | 5.97x10 <sup>-18</sup> | 2.73x10 <sup>-19</sup> |
| DOCK2    | 2.053563  | 5.52x10 <sup>-44</sup> | 1.73x10 <sup>-46</sup> |
| SLIT2    | 1.182803  | 4.19x10 <sup>-09</sup> | 3.92x10 <sup>-10</sup> |
| CCL19    | 2.870462  | 2.18x10 <sup>-24</sup> | 6.93x10 <sup>-26</sup> |
| TIFAB    | 2.415982  | 4.98x10 <sup>-39</sup> | 4.69x10 <sup>-41</sup> |
| FCGR2B   | 1.614197  | 6.51x10 <sup>-29</sup> | 1.58x10 <sup>-30</sup> |
| CCR6     | 1.181160  | 1.60x10 <sup>-13</sup> | 9.73x10 <sup>-15</sup> |
| ANK2     | 1.014841  | 3.94x10 <sup>-08</sup> | 4.20x10 <sup>-09</sup> |
| PLA2G7   | 1.748165  | 2.45x10 <sup>-32</sup> | 4.82x10 <sup>-34</sup> |
| PILRA    | 1.601365  | 3.10x10 <sup>-34</sup> | 5.18x10 <sup>-36</sup> |
| APOL3    | 1.408763  | 2.34x10 <sup>-34</sup> | 3.88x10 <sup>-36</sup> |
| VIP      | 1.728636  | 7.37x10 <sup>-06</sup> | 1.21x10 <sup>-06</sup> |
| ENTPD3   | -1.108126 | 1.60x10 <sup>-02</sup> | 7.06x10 <sup>-03</sup> |
| CD4      | 1.769737  | 7.01x10 <sup>-46</sup> | 1.00x10 <sup>-48</sup> |
| ITGA4    | 1.585347  | 7.26x10 <sup>-33</sup> | 1.37x10 <sup>-34</sup> |
| FCER1G   | 1.608361  | 4.35x10 <sup>-34</sup> | 7.40x10 <sup>-36</sup> |
| KLK5     | -2.762713 | 4.22x10 <sup>-03</sup> | 1.51x10 <sup>-03</sup> |
| CETP     | 1.253811  | 2.08x10 <sup>-20</sup> | 8.38x10 <sup>-22</sup> |
| SIGLEC14 | 1.822102  | 5.60x10 <sup>-23</sup> | 1.94x10 <sup>-24</sup> |
| KRT14    | -1.576487 | 2.04x10 <sup>-02</sup> | 9.39x10 <sup>-03</sup> |
| CD177    | 1.175175  | 1.05x10 <sup>-03</sup> | 3.05x10 <sup>-04</sup> |
| SLURP1   | -1.334399 | 4.33x10 <sup>-03</sup> | 1.55x10 <sup>-03</sup> |
| CCDC187  | -1.236332 | 3.75x10 <sup>-04</sup> | 9.56x10 <sup>-05</sup> |
| CSF1R    | 1.712447  | 6.09x10 <sup>-36</sup> | 8.57x10 <sup>-38</sup> |
| GNGT2    | 1.676039  | 7.59x10 <sup>-47</sup> | 4.88x10 <sup>-50</sup> |
| RASGRP2  | 1.739057  | 2.13x10 <sup>-19</sup> | 9.03x10 <sup>-21</sup> |
| BTLA     | 2.466683  | 8.39x10 <sup>-34</sup> | 1.45x10 <sup>-35</sup> |
| STX11    | 1.564830  | 1.55x10 <sup>-42</sup> | 6.77x10 <sup>-45</sup> |
| TDRD6    | 1.486440  | 1.41x10 <sup>-24</sup> | 4.41x10 <sup>-26</sup> |
| CTSG     | 1.861359  | 2.74x10 <sup>-05</sup> | 5.12x10 <sup>-06</sup> |
| CD163L1  | 1.362645  | 1.08x10 <sup>-14</sup> | 6.07x10 <sup>-16</sup> |
| HOXD11   | -1.764584 | 2.54x10 <sup>-05</sup> | 4.73x10 <sup>-06</sup> |
| TMEM236  | 1.813664  | 4.40x10 <sup>-07</sup> | 5.58x10 <sup>-08</sup> |
| MAGEA10  | -2.241683 | 8.78x10 <sup>-06</sup> | 1.46x10 <sup>-06</sup> |
| ITGB7    | 1.564812  | 1.22x10 <sup>-29</sup> | 2.77x10 <sup>-31</sup> |
| LAMA2    | 1.001029  | 2.24x10 <sup>-08</sup> | 2.30x10 <sup>-09</sup> |
| CD207    | 1.063885  | 4.78x10 <sup>-08</sup> | 5.17x10 <sup>-09</sup> |
| SFRP2    | 1.209773  | 1.59x10 <sup>-05</sup> | 2.81x10 <sup>-06</sup> |
| C12orf56 | -1.235925 | 2.27x10 <sup>-05</sup> | 4.17x10 <sup>-06</sup> |
| URI1     | -1.013274 | 9.01x10 <sup>-05</sup> | 1.92x10 <sup>-05</sup> |
| WDFY4    | 2.181267  | 6.87x10 <sup>-35</sup> | 1.07x10 <sup>-36</sup> |
| KRTAP5-5 | -1.404933 | 2.70x10 <sup>-02</sup> | 1.30x10 <sup>-02</sup> |
| FGFRL1   | -1.077599 | 2.41x10 <sup>-09</sup> | 2.19x10 <sup>-10</sup> |
| SH2D1A   | 2.232713  | 4.96x10 <sup>-40</sup> | 3.68x10 <sup>-42</sup> |
| LCN12    | -1.374732 | 9.51x10 <sup>-05</sup> | 2.05x10 <sup>-05</sup> |
| CCL3L1   | 1.431679  | 2.46x10 <sup>-10</sup> | 1.97x10 <sup>-11</sup> |
| SLC2A1   | -1.122991 | 5.10x10 <sup>-08</sup> | 5.53x10 <sup>-09</sup> |
| AIF1     | 1.715516  | 2.14x10 <sup>-44</sup> | 5.96x10 <sup>-47</sup> |
| COL9A3   | -2.629683 | 3.83x10 <sup>-05</sup> | 7.43x10 <sup>-06</sup> |
| MEF2B    | 2.150749  | 1.64x10 <sup>-06</sup> | 2.32x10 <sup>-07</sup> |
| XCR1     | 2.397571  | 5.70x10 <sup>-30</sup> | 1.27x10 <sup>-31</sup> |
| LCK      | 1.011589  | 6.44x10 <sup>-24</sup> | 2.07x10 <sup>-25</sup> |
| KRT6C    | -1.589007 | 3.60x10 <sup>-02</sup> | 1.84x10 <sup>-02</sup> |
| TMEM273  | 1.553943  | 1.32x10 <sup>-39</sup> | 1.06x10 <sup>-41</sup> |
| RUBCNL   | 1.360034  | 1.56x10 <sup>-23</sup> | 5.20x10 <sup>-25</sup> |
| KCNA1    | 1.001635  | 1.95x10 <sup>-04</sup> | 4.56x10 <sup>-05</sup> |
| EVI2B    | 2.093340  | 5.24x10 <sup>-48</sup> | 1.87x10 <sup>-51</sup> |
| TNFSF18  | 1.300881  | 1.38x10 <sup>-06</sup> | 1.92x10 <sup>-07</sup> |
| KNG1     | -1.486935 | 1.92x10 <sup>-02</sup> | 8.71x10 <sup>-03</sup> |

Table SI. Continued.

| Gene       | logFC     | FDR                    | P-value                |
|------------|-----------|------------------------|------------------------|
| APOE       | 1.187805  | 1.50x10 <sup>-23</sup> | 4.97x10 <sup>-25</sup> |
| LILRA4     | 2.483822  | 7.99x10 <sup>-29</sup> | 1.95x10 <sup>-30</sup> |
| VCAM1      | 1.424896  | 2.31x10 <sup>-26</sup> | 6.50x10 <sup>-28</sup> |
| FCRL5      | 1.936831  | 6.53x10 <sup>-25</sup> | 2.00x10 <sup>-26</sup> |
| CD1E       | 1.874861  | 1.62x10 <sup>-21</sup> | 6.09x10 <sup>-23</sup> |
| SIRPG      | 2.116585  | 7.80x10 <sup>-38</sup> | 8.92x10 <sup>-40</sup> |
| NKD2       | -1.596014 | 8.95x10 <sup>-09</sup> | 8.68x10 <sup>-10</sup> |
| S100A7     | -1.696008 | 2.85x10 <sup>-03</sup> | 9.60x10 <sup>-04</sup> |
| ERBB2      | -1.954792 | 1.75x10 <sup>-07</sup> | 2.08x10 <sup>-08</sup> |
| CD3E       | 2.028297  | 3.22x10 <sup>-40</sup> | 2.25x10 <sup>-42</sup> |
| MSLNL      | -1.576418 | 1.11x10 <sup>-02</sup> | 4.58x10 <sup>-03</sup> |
| SLFN12L    | 1.578354  | 8.15x10 <sup>-26</sup> | 2.36x10 <sup>-27</sup> |
| SAA1       | 1.234882  | 3.85x10 <sup>-02</sup> | 1.99x10 <sup>-02</sup> |
| MAGEA3     | -1.494479 | 1.43x10 <sup>-05</sup> | 2.51x10 <sup>-06</sup> |
| C1orf105   | -1.228027 | 1.78x10 <sup>-03</sup> | 5.57x10 <sup>-04</sup> |
| MYBPC2     | 2.113321  | 3.12x10 <sup>-09</sup> | 2.85x10 <sup>-10</sup> |
| CALML5     | -4.092547 | 3.03x10 <sup>-04</sup> | 7.49x10 <sup>-05</sup> |
| MUSK       | 1.276938  | 8.52x10 <sup>-08</sup> | 9.60x10 <sup>-09</sup> |
| S100A7A    | -1.624383 | 8.57x10 <sup>-03</sup> | 3.40x10 <sup>-03</sup> |
| LAT2       | 1.200374  | 3.80x10 <sup>-35</sup> | 5.75x10 <sup>-37</sup> |
| DOK3       | 1.594754  | 4.43x10 <sup>-39</sup> | 4.05x10 <sup>-41</sup> |
| POU5F1B    | -1.102861 | 4.37x10 <sup>-05</sup> | 8.64x10 <sup>-06</sup> |
| DLX4       | -1.551775 | 6.29x10 <sup>-05</sup> | 1.29x10 <sup>-05</sup> |
| MYOC       | 1.212501  | 5.12x10 <sup>-04</sup> | 1.35x10 <sup>-04</sup> |
| S100B      | 1.539278  | 9.83x10 <sup>-21</sup> | 3.87x10 <sup>-22</sup> |
| CD180      | 1.842866  | 6.66x10 <sup>-40</sup> | 5.19x10 <sup>-42</sup> |
| PAH        | -1.368433 | 4.05x10 <sup>-04</sup> | 1.04x10 <sup>-04</sup> |
| PLCXD3     | 1.514507  | 3.60x10 <sup>-04</sup> | 9.09x10 <sup>-05</sup> |
| ICAM3      | 1.653557  | 1.64x10 <sup>-32</sup> | 3.19x10 <sup>-34</sup> |
| CCL13      | 1.241537  | 6.85x10 <sup>-16</sup> | 3.56x10 <sup>-17</sup> |
| BFSP2      | 1.251475  | 1.67x10 <sup>-15</sup> | 8.93x10 <sup>-17</sup> |
| AC004233.2 | -1.786950 | 1.33x10 <sup>-05</sup> | 2.31x10 <sup>-06</sup> |
| MZB1       | 1.851531  | 1.44x10 <sup>-21</sup> | 5.40x10 <sup>-23</sup> |
| CCDC69     | 1.077274  | 5.07x10 <sup>-19</sup> | 2.18x10 <sup>-20</sup> |
| GPR55      | 1.551855  | 5.57x10 <sup>-19</sup> | 2.41x10 <sup>-20</sup> |
| P2RX5      | 1.671785  | 3.51x10 <sup>-14</sup> | 2.04x10 <sup>-15</sup> |
| HOXD10     | -1.340140 | 1.55x10 <sup>-02</sup> | 6.76x10 <sup>-03</sup> |
| GNGT1      | -1.299468 | 1.40x10 <sup>-06</sup> | 1.95x10 <sup>-07</sup> |
| CD37       | 2.338191  | 5.54x10 <sup>-42</sup> | 2.69x10 <sup>-44</sup> |
| OLR1       | 1.563639  | 2.78x10 <sup>-20</sup> | 1.13x10 <sup>-21</sup> |
| GABRA3     | -2.213969 | 1.21x10 <sup>-05</sup> | 2.08x10 <sup>-06</sup> |
| ITGB2      | 2.009726  | 2.90x10 <sup>-43</sup> | 1.18x10 <sup>-45</sup> |
| SPRR2D     | -1.864248 | 2.26x10 <sup>-03</sup> | 7.34x10 <sup>-04</sup> |
| ZBTB32     | 1.140063  | 2.06x10 <sup>-15</sup> | 1.11x10 <sup>-16</sup> |
| UPK1A      | -2.148624 | 1.57x10 <sup>-02</sup> | 6.90x10 <sup>-03</sup> |
| MIEN1      | -1.590712 | 6.65x10 <sup>-03</sup> | 2.53x10 <sup>-03</sup> |
| TDO2       | 1.096507  | 2.75x10 <sup>-14</sup> | 1.58x10 <sup>-15</sup> |
| CALML3     | -1.296220 | 5.48x10 <sup>-03</sup> | 2.03x10 <sup>-03</sup> |
| CCL21      | 2.105263  | 1.55x10 <sup>-14</sup> | 8.75x10 <sup>-16</sup> |
| SIRPB1     | 1.501218  | 3.04x10 <sup>-24</sup> | 9.68x10 <sup>-26</sup> |
| GPR34      | 1.657789  | 5.52x10 <sup>-35</sup> | 8.49x10 <sup>-37</sup> |
| RHCG       | -1.418144 | 1.42x10 <sup>-04</sup> | 3.21x10 <sup>-05</sup> |
| GPNUMB     | 1.345968  | 1.40x10 <sup>-25</sup> | 4.13x10 <sup>-27</sup> |
| HCK        | 1.609898  | 2.57x10 <sup>-41</sup> | 1.41x10 <sup>-43</sup> |
| MAFA       | -1.162326 | 1.06x10 <sup>-02</sup> | 4.36x10 <sup>-03</sup> |
| FLRT2      | 1.056967  | 3.74x10 <sup>-10</sup> | 3.08x10 <sup>-11</sup> |
| CCL8       | 1.448680  | 1.98x10 <sup>-14</sup> | 1.13x10 <sup>-15</sup> |
| CNR2       | 2.273197  | 4.59x10 <sup>-14</sup> | 2.68x10 <sup>-15</sup> |
| RIPOR2     | 1.934311  | 3.56x10 <sup>-31</sup> | 7.53x10 <sup>-33</sup> |

Table SI. Continued.

| Gene     | logFC     | FDR                    | P-value                |
|----------|-----------|------------------------|------------------------|
| LILRB3   | 1.300000  | 7.18x10 <sup>-32</sup> | 1.45x10 <sup>-33</sup> |
| SVEP1    | 1.396726  | 1.65x10 <sup>-10</sup> | 1.30x10 <sup>-11</sup> |
| ART3     | 1.332189  | 9.94x10 <sup>-04</sup> | 2.88x10 <sup>-04</sup> |
| ADRA2C   | -1.982788 | 9.40x10 <sup>-03</sup> | 3.79x10 <sup>-03</sup> |
| CD79A    | 2.797521  | 6.81x10 <sup>-25</sup> | 2.09x10 <sup>-26</sup> |
| SLAMF6   | 2.140296  | 2.27x10 <sup>-40</sup> | 1.53x10 <sup>-42</sup> |
| TRAT1    | 2.566954  | 9.12x10 <sup>-44</sup> | 3.19x10 <sup>-46</sup> |
| GIMAP5   | 1.900395  | 2.07x10 <sup>-38</sup> | 2.15x10 <sup>-40</sup> |
| OPRD1    | -2.244633 | 9.60x10 <sup>-03</sup> | 3.88x10 <sup>-03</sup> |
| CXCR3    | 1.687214  | 1.45x10 <sup>-33</sup> | 2.56x10 <sup>-35</sup> |
| NCF2     | 1.382118  | 2.73x10 <sup>-31</sup> | 5.72x10 <sup>-33</sup> |
| SPINK4   | -1.066484 | 1.58x10 <sup>-03</sup> | 4.87x10 <sup>-04</sup> |
| MEX3A    | -1.189257 | 1.71x10 <sup>-06</sup> | 2.43x10 <sup>-07</sup> |
| ICOS     | 1.880289  | 5.40x10 <sup>-35</sup> | 8.26x10 <sup>-37</sup> |
| GIMAP6   | 1.486557  | 9.01x10 <sup>-39</sup> | 8.95x10 <sup>-41</sup> |
| IFIT3    | 1.066493  | 9.24x10 <sup>-17</sup> | 4.56x10 <sup>-18</sup> |
| HHIPL2   | -1.036097 | 1.59x10 <sup>-04</sup> | 3.64x10 <sup>-05</sup> |
| IL22RA2  | 1.758464  | 2.11x10 <sup>-15</sup> | 1.14x10 <sup>-16</sup> |
| LSP1     | 1.672643  | 2.28x10 <sup>-42</sup> | 1.07x10 <sup>-44</sup> |
| CA9      | -1.323337 | 9.80x10 <sup>-03</sup> | 3.98x10 <sup>-03</sup> |
| FCRL6    | 2.476469  | 3.89x10 <sup>-38</sup> | 4.20x10 <sup>-40</sup> |
| CSF2RB   | 2.007652  | 2.96x10 <sup>-40</sup> | 2.03x10 <sup>-42</sup> |
| SPI1     | 1.653331  | 2.74x10 <sup>-43</sup> | 1.08x10 <sup>-45</sup> |
| HAPLN2   | -1.047445 | 1.24x10 <sup>-03</sup> | 3.71x10 <sup>-04</sup> |
| 01-Sep   | 1.761349  | 1.75x10 <sup>-36</sup> | 2.37x10 <sup>-38</sup> |
| RASGRP1  | 1.112805  | 4.66x10 <sup>-22</sup> | 1.68x10 <sup>-23</sup> |
| ASPG     | -1.701056 | 6.09x10 <sup>-07</sup> | 7.94x10 <sup>-08</sup> |
| SHISA8   | 1.368593  | 2.06x10 <sup>-03</sup> | 6.60x10 <sup>-04</sup> |
| EGR4     | -1.014403 | 4.23x10 <sup>-02</sup> | 2.23x10 <sup>-02</sup> |
| RERGL    | 1.072347  | 2.84x10 <sup>-04</sup> | 6.92x10 <sup>-05</sup> |
| APOC1    | 1.216346  | 1.98x10 <sup>-20</sup> | 7.95x10 <sup>-22</sup> |
| F7       | -1.349868 | 1.02x10 <sup>-02</sup> | 4.16x10 <sup>-03</sup> |
| CHST2    | 1.060974  | 3.49x10 <sup>-18</sup> | 1.57x10 <sup>-19</sup> |
| SERPINF1 | 1.012602  | 1.25x10 <sup>-10</sup> | 9.66x10 <sup>-12</sup> |
| LILRA5   | 1.280278  | 4.24x10 <sup>-23</sup> | 1.45x10 <sup>-24</sup> |
| LCP2     | 1.647598  | 7.36x10 <sup>-46</sup> | 1.16x10 <sup>-48</sup> |
| KLK12    | -1.919048 | 1.59x10 <sup>-02</sup> | 6.99x10 <sup>-03</sup> |
| DERL3    | 1.384860  | 1.76x10 <sup>-14</sup> | 1.00x10 <sup>-15</sup> |
| SP8      | -1.510619 | 2.47x10 <sup>-03</sup> | 8.15x10 <sup>-04</sup> |
| MS4A4E   | 1.202086  | 9.98x10 <sup>-13</sup> | 6.45x10 <sup>-14</sup> |
| LMX1B    | -1.668862 | 1.85x10 <sup>-05</sup> | 3.32x10 <sup>-06</sup> |
| 06-Sep   | 1.155244  | 1.32x10 <sup>-21</sup> | 4.95x10 <sup>-23</sup> |
| NCR1     | 1.381688  | 1.40x10 <sup>-17</sup> | 6.58x10 <sup>-19</sup> |
| ADGRE3   | 1.810883  | 9.47x10 <sup>-17</sup> | 4.69x10 <sup>-18</sup> |
| CCR1     | 1.538133  | 8.10x10 <sup>-36</sup> | 1.15x10 <sup>-37</sup> |
| PLA2G2D  | 3.190400  | 3.32x10 <sup>-36</sup> | 4.61x10 <sup>-38</sup> |
| CGB5     | -1.218285 | 3.91x10 <sup>-02</sup> | 2.03x10 <sup>-02</sup> |
| IKZF3    | 1.357050  | 2.41x10 <sup>-28</sup> | 5.96x10 <sup>-30</sup> |
| TRARG1   | 1.583937  | 2.70x10 <sup>-03</sup> | 9.04x10 <sup>-04</sup> |
| ATP6V0A4 | -1.218616 | 3.24x10 <sup>-04</sup> | 8.08x10 <sup>-05</sup> |
| CXCL13   | 2.783372  | 1.49x10 <sup>-27</sup> | 3.82x10 <sup>-29</sup> |
| FMNL1    | 1.382039  | 1.77x10 <sup>-37</sup> | 2.12x10 <sup>-39</sup> |
| PDCD1LG2 | 1.810538  | 3.80x10 <sup>-39</sup> | 3.40x10 <sup>-41</sup> |
| SLA2     | 1.875868  | 5.27x10 <sup>-40</sup> | 4.03x10 <sup>-42</sup> |
| RUFY4    | 1.025344  | 4.55x10 <sup>-07</sup> | 5.79x10 <sup>-08</sup> |
| KRT40    | -3.448145 | 9.18x10 <sup>-03</sup> | 3.68x10 <sup>-03</sup> |
| PLPPR1   | -1.116140 | 5.31x10 <sup>-04</sup> | 1.41x10 <sup>-04</sup> |
| PSMB9    | 1.011858  | 5.16x10 <sup>-15</sup> | 2.85x10 <sup>-16</sup> |
| IFFO1    | 1.065843  | 2.21x10 <sup>-27</sup> | 5.73x10 <sup>-29</sup> |

Table SI. Continued.

| Gene       | logFC     | FDR                    | P-value                |
|------------|-----------|------------------------|------------------------|
| CD74       | 1.660529  | 1.10x10 <sup>-36</sup> | 1.46x10 <sup>-38</sup> |
| C19orf38   | 1.446849  | 8.24x10 <sup>-30</sup> | 1.84x10 <sup>-31</sup> |
| ACP7       | -1.935727 | 4.52x10 <sup>-03</sup> | 1.63x10 <sup>-03</sup> |
| NOTUM      | -4.141822 | 2.41x10 <sup>-05</sup> | 4.46x10 <sup>-06</sup> |
| DPYD       | 1.097875  | 6.56x10 <sup>-21</sup> | 2.55x10 <sup>-22</sup> |
| RSPO4      | -1.712698 | 1.10x10 <sup>-03</sup> | 3.22x10 <sup>-04</sup> |
| GAL3ST4    | 1.077141  | 1.22x10 <sup>-21</sup> | 4.54x10 <sup>-23</sup> |
| BEND4      | 1.078791  | 2.45x10 <sup>-15</sup> | 1.33x10 <sup>-16</sup> |
| EBI3       | 1.885681  | 1.39x10 <sup>-34</sup> | 2.24x10 <sup>-36</sup> |
| CNTN2      | 1.180625  | 7.90x10 <sup>-04</sup> | 2.20x10 <sup>-04</sup> |
| SPDYC      | -1.190079 | 1.87x10 <sup>-02</sup> | 8.45x10 <sup>-03</sup> |
| HLA-DOA    | 2.223881  | 3.10x10 <sup>-38</sup> | 3.28x10 <sup>-40</sup> |
| SNX20      | 1.932808  | 3.78x10 <sup>-45</sup> | 8.65x10 <sup>-48</sup> |
| SCIMP      | 2.131792  | 2.17x10 <sup>-44</sup> | 6.35x10 <sup>-47</sup> |
| FOLR1      | -1.440902 | 1.12x10 <sup>-02</sup> | 4.67x10 <sup>-03</sup> |
| LRRN4      | -1.008175 | 5.08x10 <sup>-03</sup> | 1.87x10 <sup>-03</sup> |
| CRHBP      | 1.487343  | 1.86x10 <sup>-20</sup> | 7.46x10 <sup>-22</sup> |
| HLA-DMB    | 1.845577  | 2.57x10 <sup>-40</sup> | 1.75x10 <sup>-42</sup> |
| ARHGAP15   | 1.865928  | 6.51x10 <sup>-45</sup> | 1.58x10 <sup>-47</sup> |
| DMRTA2     | -1.032118 | 1.02x10 <sup>-03</sup> | 2.96x10 <sup>-04</sup> |
| DCN        | 1.115020  | 9.51x10 <sup>-11</sup> | 7.29x10 <sup>-12</sup> |
| CCR5       | 2.125145  | 6.84x10 <sup>-45</sup> | 1.71x10 <sup>-47</sup> |
| CLEC4D     | 1.937656  | 1.71x10 <sup>-19</sup> | 7.19x10 <sup>-21</sup> |
| IGFL1      | -1.884275 | 2.25x10 <sup>-02</sup> | 1.05x10 <sup>-02</sup> |
| PTGDR      | 1.419914  | 9.25x10 <sup>-24</sup> | 3.01x10 <sup>-25</sup> |
| CYFIP2     | 1.032922  | 3.12x10 <sup>-14</sup> | 1.81x10 <sup>-15</sup> |
| CYBB       | 1.982416  | 1.23x10 <sup>-43</sup> | 4.50x10 <sup>-46</sup> |
| C1S        | 1.192750  | 5.24x10 <sup>-22</sup> | 1.89x10 <sup>-23</sup> |
| FGD2       | 1.677255  | 4.46x10 <sup>-40</sup> | 3.22x10 <sup>-42</sup> |
| SYT1       | -1.188369 | 2.06x10 <sup>-03</sup> | 6.59x10 <sup>-04</sup> |
| SELL       | 2.282978  | 5.18x10 <sup>-41</sup> | 2.92x10 <sup>-43</sup> |
| SLC1A2     | 1.223146  | 1.48x10 <sup>-04</sup> | 3.36x10 <sup>-05</sup> |
| LIPN       | 1.462075  | 2.82x10 <sup>-05</sup> | 5.29x10 <sup>-06</sup> |
| CLEC4A     | 1.553299  | 3.31x10 <sup>-38</sup> | 3.53x10 <sup>-40</sup> |
| ABI3       | 1.510829  | 9.81x10 <sup>-44</sup> | 3.51x10 <sup>-46</sup> |
| NTSR1      | -1.744618 | 2.86x10 <sup>-04</sup> | 6.99x10 <sup>-05</sup> |
| PIK3CG     | 2.071000  | 7.51x10 <sup>-38</sup> | 8.54x10 <sup>-40</sup> |
| PLXNC1     | 1.203296  | 2.48x10 <sup>-27</sup> | 6.47x10 <sup>-29</sup> |
| AC119396.1 | 1.609794  | 7.41x10 <sup>-09</sup> | 7.16x10 <sup>-10</sup> |
| THEMIS2    | 1.350755  | 1.07x10 <sup>-38</sup> | 1.07x10 <sup>-40</sup> |
| SLC38A3    | -2.613268 | 2.67x10 <sup>-02</sup> | 1.29x10 <sup>-02</sup> |
| FOLR2      | 1.717390  | 5.67x10 <sup>-26</sup> | 1.63x10 <sup>-27</sup> |
| GRB7       | -1.818690 | 1.53x10 <sup>-09</sup> | 1.36x10 <sup>-10</sup> |
| CD84       | 2.004146  | 4.57x10 <sup>-44</sup> | 1.37x10 <sup>-46</sup> |
| ITGAL      | 2.151672  | 7.40x10 <sup>-44</sup> | 2.49x10 <sup>-46</sup> |
| KLRC1      | 1.263171  | 4.46x10 <sup>-16</sup> | 2.30x10 <sup>-17</sup> |
| SIGLEC6    | 1.422161  | 1.14x10 <sup>-13</sup> | 6.85x10 <sup>-15</sup> |
| SALL4      | -1.176255 | 3.17x10 <sup>-04</sup> | 7.87x10 <sup>-05</sup> |
| FZD9       | -1.453665 | 9.50x10 <sup>-03</sup> | 3.83x10 <sup>-03</sup> |
| MAGEA12    | -1.708095 | 1.49x10 <sup>-02</sup> | 6.47x10 <sup>-03</sup> |
| BTK        | 2.156034  | 2.34x10 <sup>-45</sup> | 4.51x10 <sup>-48</sup> |
| TDRD5      | -1.061861 | 5.36x10 <sup>-06</sup> | 8.47x10 <sup>-07</sup> |
| TNFRSF8    | 1.016084  | 1.16x10 <sup>-21</sup> | 4.30x10 <sup>-23</sup> |
| SSC4D      | -1.237755 | 4.62x10 <sup>-05</sup> | 9.20x10 <sup>-06</sup> |
| ZEB2       | 1.285077  | 3.24x10 <sup>-29</sup> | 7.67x10 <sup>-31</sup> |
| ANO3       | -1.245580 | 3.08x10 <sup>-04</sup> | 7.61x10 <sup>-05</sup> |
| PLA2G5     | 1.014609  | 4.60x10 <sup>-05</sup> | 9.15x10 <sup>-06</sup> |
| MGAM       | 1.104809  | 4.49x10 <sup>-04</sup> | 1.17x10 <sup>-04</sup> |
| MAGEA9B    | -1.932875 | 2.95x10 <sup>-05</sup> | 5.56x10 <sup>-06</sup> |

Table SI. Continued.

| Gene     | logFC     | FDR                    | P-value                |
|----------|-----------|------------------------|------------------------|
| ZAP70    | 1.569279  | 5.92x10 <sup>-31</sup> | 1.27x10 <sup>-32</sup> |
| PTGDS    | 1.973712  | 9.63x10 <sup>-20</sup> | 3.99x10 <sup>-21</sup> |
| SIGLEC5  | 1.612523  | 2.16x10 <sup>-26</sup> | 6.04x10 <sup>-28</sup> |
| GPSM3    | 1.468259  | 1.44x10 <sup>-40</sup> | 9.04x10 <sup>-43</sup> |
| PTCH2    | 1.253045  | 4.21x10 <sup>-05</sup> | 8.27x10 <sup>-06</sup> |
| DDN      | -1.202032 | 6.71x10 <sup>-03</sup> | 2.56x10 <sup>-03</sup> |
| SH2D3C   | 1.023051  | 5.88x10 <sup>-23</sup> | 2.04x10 <sup>-24</sup> |
| CNGA3    | 1.229094  | 1.60x10 <sup>-06</sup> | 2.26x10 <sup>-07</sup> |
| ELANE    | 5.922001  | 3.11x10 <sup>-03</sup> | 1.06x10 <sup>-03</sup> |
| CCL4L2   | 1.444839  | 2.10x10 <sup>-17</sup> | 9.97x10 <sup>-19</sup> |
| CD1C     | 2.065769  | 4.74x10 <sup>-23</sup> | 1.63x10 <sup>-24</sup> |
| BHLHE22  | 1.536456  | 1.98x10 <sup>-21</sup> | 7.48x10 <sup>-23</sup> |
| DOCK10   | 1.766800  | 1.28x10 <sup>-40</sup> | 7.89x10 <sup>-43</sup> |
| USH1G    | -1.547471 | 8.69x10 <sup>-10</sup> | 7.48x10 <sup>-11</sup> |
| GPR183   | 1.596272  | 1.30x10 <sup>-34</sup> | 2.09x10 <sup>-36</sup> |
| ABCA6    | 1.181550  | 2.99x10 <sup>-11</sup> | 2.18x10 <sup>-12</sup> |
| CD101    | 1.055221  | 7.17x10 <sup>-20</sup> | 2.95x10 <sup>-21</sup> |
| TGM3     | -1.040933 | 3.62x10 <sup>-02</sup> | 1.85x10 <sup>-02</sup> |
| CLEC2D   | 1.722444  | 2.01x10 <sup>-31</sup> | 4.17x10 <sup>-33</sup> |
| APOA5    | -1.736818 | 1.74x10 <sup>-02</sup> | 7.78x10 <sup>-03</sup> |
| COLEC12  | 1.056852  | 1.29x10 <sup>-11</sup> | 9.02x10 <sup>-13</sup> |
| KCNQ5    | 1.268854  | 3.80x10 <sup>-10</sup> | 3.13x10 <sup>-11</sup> |
| HLA-DQA2 | 2.358390  | 1.15x10 <sup>-21</sup> | 4.25x10 <sup>-23</sup> |
| ANKRD44  | 1.536152  | 3.54x10 <sup>-34</sup> | 5.94x10 <sup>-36</sup> |
| CCR4     | 2.081731  | 6.59x10 <sup>-35</sup> | 1.02x10 <sup>-36</sup> |
| GZMH     | 2.222708  | 2.91x10 <sup>-30</sup> | 6.34x10 <sup>-32</sup> |
| TTC25    | -1.285437 | 2.04x10 <sup>-02</sup> | 9.38x10 <sup>-03</sup> |
| PDE1A    | 1.059225  | 9.05x10 <sup>-11</sup> | 6.91x10 <sup>-12</sup> |
| FAS      | 1.047387  | 8.88x10 <sup>-20</sup> | 3.67x10 <sup>-21</sup> |
| PRSS56   | -3.103363 | 7.05x10 <sup>-03</sup> | 2.71x10 <sup>-03</sup> |
| SRGN     | 1.824039  | 8.86x10 <sup>-48</sup> | 3.80x10 <sup>-51</sup> |
| GBP1     | 1.507718  | 4.51x10 <sup>-25</sup> | 1.37x10 <sup>-26</sup> |
| ST8SIA1  | 1.014213  | 1.91x10 <sup>-18</sup> | 8.54x10 <sup>-20</sup> |
| SORCS1   | 1.421148  | 6.29x10 <sup>-07</sup> | 8.22x10 <sup>-08</sup> |
| FLT3     | 1.725028  | 1.74x10 <sup>-24</sup> | 5.50x10 <sup>-26</sup> |
| F13A1    | 1.749906  | 3.01x10 <sup>-11</sup> | 2.19x10 <sup>-12</sup> |
| CLDN19   | -1.244534 | 3.04x10 <sup>-02</sup> | 1.50x10 <sup>-02</sup> |
| ICAM1    | 1.200234  | 2.87x10 <sup>-20</sup> | 1.16x10 <sup>-21</sup> |
| DLX6     | -1.739789 | 4.18x10 <sup>-06</sup> | 6.49x10 <sup>-07</sup> |
| MEOX2    | 1.333953  | 2.80x10 <sup>-07</sup> | 3.42x10 <sup>-08</sup> |
| CLEC3B   | 1.117573  | 1.73x10 <sup>-06</sup> | 2.46x10 <sup>-07</sup> |
| CD244    | 1.720415  | 1.51x10 <sup>-31</sup> | 3.12x10 <sup>-33</sup> |
| PIK3R6   | 1.266076  | 1.06x10 <sup>-34</sup> | 1.70x10 <sup>-36</sup> |
| JCHAIN   | 2.005198  | 6.15x10 <sup>-20</sup> | 2.52x10 <sup>-21</sup> |
| CTSV     | -1.508212 | 4.82x10 <sup>-05</sup> | 9.63x10 <sup>-06</sup> |
| PRR20G   | -2.720062 | 2.78x10 <sup>-02</sup> | 1.35x10 <sup>-02</sup> |
| ADAP2    | 1.084112  | 3.85x10 <sup>-32</sup> | 7.69x10 <sup>-34</sup> |
| UBD      | 1.633109  | 1.66x10 <sup>-13</sup> | 1.01x10 <sup>-14</sup> |
| ADGRG3   | 1.172808  | 4.10x10 <sup>-08</sup> | 4.37x10 <sup>-09</sup> |
| LTB      | 1.508231  | 1.11x10 <sup>-17</sup> | 5.15x10 <sup>-19</sup> |
| FBN3     | -1.834570 | 6.71x10 <sup>-04</sup> | 1.83x10 <sup>-04</sup> |
| FCRLB    | 1.178012  | 6.76x10 <sup>-04</sup> | 1.85x10 <sup>-04</sup> |
| IGF1     | 1.311337  | 1.12x10 <sup>-10</sup> | 8.62x10 <sup>-12</sup> |
| IZUMO2   | -1.114722 | 1.02x10 <sup>-02</sup> | 4.17x10 <sup>-03</sup> |
| RASSF2   | 1.506703  | 3.66x10 <sup>-27</sup> | 9.69x10 <sup>-29</sup> |
| OMD      | 1.437213  | 9.06x10 <sup>-08</sup> | 1.02x10 <sup>-08</sup> |
| NKAIN1   | -2.094792 | 1.41x10 <sup>-03</sup> | 4.28x10 <sup>-04</sup> |
| CYP1B1   | 1.419201  | 8.07x10 <sup>-13</sup> | 5.15x10 <sup>-14</sup> |
| ITGAX    | 1.449343  | 2.20x10 <sup>-33</sup> | 3.96x10 <sup>-35</sup> |

Table SI. Continued.

| Gene     | logFC     | FDR                    | P-value                |
|----------|-----------|------------------------|------------------------|
| CDC6     | -1.505731 | 1.52x10 <sup>-04</sup> | 3.44x10 <sup>-05</sup> |
| SERPING1 | 1.114488  | 1.27x10 <sup>-19</sup> | 5.34x10 <sup>-21</sup> |
| TNFRSF9  | 1.446916  | 9.12x10 <sup>-29</sup> | 2.24x10 <sup>-30</sup> |
| GZMB     | 1.907194  | 2.32x10 <sup>-21</sup> | 8.80x10 <sup>-23</sup> |
| MPO      | 5.311778  | 8.28x10 <sup>-07</sup> | 1.10x10 <sup>-07</sup> |
| CLEC4E   | 1.994795  | 1.99x10 <sup>-29</sup> | 4.62x10 <sup>-31</sup> |
| ARHGDIIB | 1.479105  | 7.72x10 <sup>-44</sup> | 2.65x10 <sup>-46</sup> |
| OSCAR    | 1.274550  | 3.26x10 <sup>-22</sup> | 1.17x10 <sup>-23</sup> |
| PHOX2A   | 1.165679  | 4.34x10 <sup>-02</sup> | 2.29x10 <sup>-02</sup> |
| CEACAM4  | 1.716555  | 3.62x10 <sup>-29</sup> | 8.60x10 <sup>-31</sup> |
| GMFG     | 1.484150  | 3.45x10 <sup>-45</sup> | 7.15x10 <sup>-48</sup> |
| TRIM54   | -1.023380 | 2.02x10 <sup>-02</sup> | 9.23x10 <sup>-03</sup> |
| IRF4     | 2.004927  | 1.10x10 <sup>-32</sup> | 2.10x10 <sup>-34</sup> |
| LRMP     | 1.586334  | 5.30x10 <sup>-25</sup> | 1.62x10 <sup>-26</sup> |
| WNT3A    | -1.159934 | 2.94x10 <sup>-03</sup> | 9.91x10 <sup>-04</sup> |
| HVCN1    | 1.607666  | 4.64x10 <sup>-37</sup> | 6.03x10 <sup>-39</sup> |
| RHOH     | 2.117542  | 3.78x10 <sup>-45</sup> | 8.52x10 <sup>-48</sup> |
| ASPA     | 1.022205  | 4.86x10 <sup>-10</sup> | 4.05x10 <sup>-11</sup> |
| CALHM6   | 1.815621  | 1.23x10 <sup>-29</sup> | 2.81x10 <sup>-31</sup> |
| MS4A14   | 1.329880  | 2.82x10 <sup>-23</sup> | 9.59x10 <sup>-25</sup> |
| BOC      | 1.115399  | 3.72x10 <sup>-09</sup> | 3.46x10 <sup>-10</sup> |
| IFNG     | 2.349410  | 1.17x10 <sup>-21</sup> | 4.34x10 <sup>-23</sup> |
| IKZF1    | 2.226220  | 9.77x10 <sup>-45</sup> | 2.58x10 <sup>-47</sup> |
| CD33     | 1.783457  | 5.80x10 <sup>-39</sup> | 5.52x10 <sup>-41</sup> |
| PLEKHO1  | 1.042452  | 1.38x10 <sup>-24</sup> | 4.31x10 <sup>-26</sup> |
| PROK2    | 1.516549  | 2.85x10 <sup>-03</sup> | 9.60x10 <sup>-04</sup> |
| GPR82    | 1.342567  | 7.80x10 <sup>-25</sup> | 2.41x10 <sup>-26</sup> |
| SLCO2B1  | 1.063039  | 2.12x10 <sup>-23</sup> | 7.15x10 <sup>-25</sup> |
| CCR2     | 2.186977  | 4.22x10 <sup>-38</sup> | 4.58x10 <sup>-40</sup> |
| IGLL1    | 3.397424  | 9.87x10 <sup>-16</sup> | 5.20x10 <sup>-17</sup> |
| FRZB     | 1.207229  | 4.47x10 <sup>-10</sup> | 3.70x10 <sup>-11</sup> |
| CCR9     | 1.025599  | 4.51x10 <sup>-08</sup> | 4.85x10 <sup>-09</sup> |
| KLK13    | -1.686917 | 1.99x10 <sup>-03</sup> | 6.34x10 <sup>-04</sup> |
| LST1     | 1.612646  | 5.98x10 <sup>-42</sup> | 2.95x10 <sup>-44</sup> |
| PIM2     | 1.291695  | 2.49x10 <sup>-25</sup> | 7.46x10 <sup>-27</sup> |
| GFRA2    | 1.242040  | 3.35x10 <sup>-10</sup> | 2.74x10 <sup>-11</sup> |
| CR2      | 2.626067  | 7.21x10 <sup>-08</sup> | 8.07x10 <sup>-09</sup> |
| LILRB2   | 1.603848  | 1.64x10 <sup>-36</sup> | 2.21x10 <sup>-38</sup> |
| GNG2     | 1.305423  | 4.54x10 <sup>-33</sup> | 8.43x10 <sup>-35</sup> |
| NT5DC4   | -1.036035 | 1.49x10 <sup>-02</sup> | 6.47x10 <sup>-03</sup> |
| FREM2    | -1.731275 | 8.46x10 <sup>-06</sup> | 1.40x10 <sup>-06</sup> |
| APOBEC3G | 1.497324  | 1.23x10 <sup>-33</sup> | 2.15x10 <sup>-35</sup> |
| ENTPD8   | -1.262572 | 3.07x10 <sup>-08</sup> | 3.22x10 <sup>-09</sup> |
| DMP1     | -1.221157 | 5.87x10 <sup>-04</sup> | 1.58x10 <sup>-04</sup> |
| SOHLH1   | -2.637145 | 6.95x10 <sup>-07</sup> | 9.14x10 <sup>-08</sup> |
| SIGLEC8  | 2.453160  | 2.61x10 <sup>-37</sup> | 3.26x10 <sup>-39</sup> |
| FGFR3    | -1.204818 | 5.45x10 <sup>-08</sup> | 5.95x10 <sup>-09</sup> |
| IL2RB    | 1.829558  | 4.61x10 <sup>-38</sup> | 5.07x10 <sup>-40</sup> |
| IDO1     | 2.885464  | 6.70x10 <sup>-24</sup> | 2.16x10 <sup>-25</sup> |
| BIN2     | 1.755219  | 9.78x10 <sup>-49</sup> | 2.10x10 <sup>-52</sup> |
| ADIPOQ   | 1.000734  | 4.07x10 <sup>-02</sup> | 2.12x10 <sup>-02</sup> |
| C1QB     | 2.076897  | 6.90x10 <sup>-40</sup> | 5.43x10 <sup>-42</sup> |
| WNT7B    | -1.078918 | 7.59x10 <sup>-04</sup> | 2.10x10 <sup>-04</sup> |
| CLEC4G   | 1.118964  | 1.23x10 <sup>-12</sup> | 8.01x10 <sup>-14</sup> |
| SIT1     | 2.254336  | 2.16x10 <sup>-39</sup> | 1.86x10 <sup>-41</sup> |
| SIGLEC12 | 1.208430  | 3.58x10 <sup>-09</sup> | 3.31x10 <sup>-10</sup> |
| CD70     | 1.043672  | 1.10x10 <sup>-09</sup> | 9.62x10 <sup>-11</sup> |
| SCN7A    | 1.180867  | 8.79x10 <sup>-06</sup> | 1.46x10 <sup>-06</sup> |
| TLR4     | 1.069151  | 1.40x10 <sup>-24</sup> | 4.36x10 <sup>-26</sup> |

Table SI. Continued.

| Gene       | logFC     | FDR                    | P-value                |
|------------|-----------|------------------------|------------------------|
| PYGM       | 1.019841  | 2.18x10 <sup>-05</sup> | 4.00x10 <sup>-06</sup> |
| HLA-DQB1   | 1.758438  | 2.81x10 <sup>-29</sup> | 6.59x10 <sup>-31</sup> |
| TMEM40     | -1.243875 | 2.63x10 <sup>-03</sup> | 8.79x10 <sup>-04</sup> |
| AC136428.1 | 1.686256  | 5.47x10 <sup>-16</sup> | 2.83x10 <sup>-17</sup> |
| KLRF1      | 1.310300  | 6.40x10 <sup>-19</sup> | 2.78x10 <sup>-20</sup> |
| LILRA6     | 1.299106  | 1.92x10 <sup>-20</sup> | 7.70x10 <sup>-22</sup> |
| CD247      | 1.857354  | 1.23x10 <sup>-41</sup> | 6.42x10 <sup>-44</sup> |
| TNFRSF17   | 1.945853  | 1.57x10 <sup>-22</sup> | 5.56x10 <sup>-24</sup> |
| CLEC2B     | 1.262980  | 2.18x10 <sup>-33</sup> | 3.90x10 <sup>-35</sup> |
| PREX1      | 1.151045  | 6.72x10 <sup>-28</sup> | 1.69x10 <sup>-29</sup> |
| SIGLEC1    | 1.868429  | 7.35x10 <sup>-32</sup> | 1.49x10 <sup>-33</sup> |
| CHIT1      | 2.260916  | 1.16x10 <sup>-15</sup> | 6.15x10 <sup>-17</sup> |
| FCER1A     | 1.731637  | 3.61x10 <sup>-07</sup> | 4.51x10 <sup>-08</sup> |
| LY9        | 2.427765  | 7.38x10 <sup>-41</sup> | 4.32x10 <sup>-43</sup> |
| FOXP3      | 1.387070  | 3.89x10 <sup>-31</sup> | 8.25x10 <sup>-33</sup> |
| SP9        | -1.825792 | 3.66x10 <sup>-03</sup> | 1.28x10 <sup>-03</sup> |
| GYPC       | 1.263126  | 3.14x10 <sup>-25</sup> | 9.43x10 <sup>-27</sup> |
| KEL        | 1.306138  | 1.86x10 <sup>-09</sup> | 1.67x10 <sup>-10</sup> |
| CASP1      | 1.117886  | 4.17x10 <sup>-21</sup> | 1.59x10 <sup>-22</sup> |
| CRNN       | -1.291837 | 2.57x10 <sup>-02</sup> | 1.23x10 <sup>-02</sup> |
| CD83       | 1.097659  | 9.66x10 <sup>-27</sup> | 2.60x10 <sup>-28</sup> |
| KRT7       | -1.036424 | 2.54x10 <sup>-05</sup> | 4.72x10 <sup>-06</sup> |
| UPK2       | -2.955949 | 3.84x10 <sup>-02</sup> | 1.99x10 <sup>-02</sup> |
| CALHM3     | -1.966831 | 5.32x10 <sup>-03</sup> | 1.96x10 <sup>-03</sup> |
| TLL1       | 1.087325  | 8.48x10 <sup>-11</sup> | 6.46x10 <sup>-12</sup> |
| CLEC5A     | 1.092968  | 1.37x10 <sup>-07</sup> | 1.61x10 <sup>-08</sup> |
| PTAFR      | 1.210737  | 6.52x10 <sup>-27</sup> | 1.74x10 <sup>-28</sup> |
| LIPA       | 1.052726  | 2.79x10 <sup>-23</sup> | 9.48x10 <sup>-25</sup> |
| PTPN7      | 1.662761  | 2.16x10 <sup>-37</sup> | 2.63x10 <sup>-39</sup> |
| SLC10A4    | -1.005499 | 1.86x10 <sup>-02</sup> | 8.38x10 <sup>-03</sup> |
| LGALS7B    | -1.171694 | 4.32x10 <sup>-08</sup> | 4.63x10 <sup>-09</sup> |
| KERA       | 1.445679  | 9.63x10 <sup>-06</sup> | 1.62x10 <sup>-06</sup> |
| CYTH4      | 1.741092  | 9.89x10 <sup>-47</sup> | 8.08x10 <sup>-50</sup> |
| MS4A1      | 3.292453  | 6.62x10 <sup>-21</sup> | 2.58x10 <sup>-22</sup> |
| KLRC4      | 1.905230  | 8.26x10 <sup>-19</sup> | 3.61x10 <sup>-20</sup> |
| SIGLEC10   | 2.197461  | 8.57x10 <sup>-45</sup> | 2.21x10 <sup>-47</sup> |
| CLEC12A    | 1.801068  | 3.70x10 <sup>-33</sup> | 6.80x10 <sup>-35</sup> |
| GPR15      | 1.953072  | 9.92x10 <sup>-08</sup> | 1.13x10 <sup>-08</sup> |
| HCST       | 1.922667  | 1.69x10 <sup>-39</sup> | 1.40x10 <sup>-41</sup> |
| GPC2       | -1.012520 | 2.57x10 <sup>-02</sup> | 1.23x10 <sup>-02</sup> |
| FCRL3      | 2.694191  | 1.17x10 <sup>-26</sup> | 3.19x10 <sup>-28</sup> |
| GALR3      | -1.277264 | 1.96x10 <sup>-06</sup> | 2.83x10 <sup>-07</sup> |
| GREM2      | 1.062137  | 8.41x10 <sup>-04</sup> | 2.36x10 <sup>-04</sup> |
| P2RY10     | 2.528654  | 3.43x10 <sup>-43</sup> | 1.42x10 <sup>-45</sup> |
| MS4A2      | 1.105258  | 3.53x10 <sup>-08</sup> | 3.73x10 <sup>-09</sup> |
| MAGEA4     | -2.021625 | 1.94x10 <sup>-03</sup> | 6.18x10 <sup>-04</sup> |
| NKX2-8     | -1.038003 | 6.20x10 <sup>-04</sup> | 1.68x10 <sup>-04</sup> |
| BTN1A1     | 1.023235  | 2.82x10 <sup>-04</sup> | 6.86x10 <sup>-05</sup> |
| RGL3       | -1.209424 | 7.11x10 <sup>-06</sup> | 1.16x10 <sup>-06</sup> |
| SLC18A3    | 1.362607  | 3.42x10 <sup>-02</sup> | 1.73x10 <sup>-02</sup> |
| CCL5       | 2.105618  | 5.20x10 <sup>-35</sup> | 7.92x10 <sup>-37</sup> |
| CLDN9      | -1.374166 | 6.03x10 <sup>-05</sup> | 1.23x10 <sup>-05</sup> |
| CXCR6      | 1.892554  | 8.33x10 <sup>-38</sup> | 9.58x10 <sup>-40</sup> |
| PITX2      | -1.062411 | 1.35x10 <sup>-02</sup> | 5.76x10 <sup>-03</sup> |
| IGFL4      | -1.508493 | 4.78x10 <sup>-03</sup> | 1.74x10 <sup>-03</sup> |
| FCN1       | 1.955374  | 2.20x10 <sup>-26</sup> | 6.19x10 <sup>-28</sup> |
| TNFSF8     | 2.141410  | 9.95x10 <sup>-43</sup> | 4.27x10 <sup>-45</sup> |
| 01-Mar     | 1.419609  | 2.20x10 <sup>-33</sup> | 3.96x10 <sup>-35</sup> |
| CMKLR1     | 1.514687  | 8.76x10 <sup>-41</sup> | 5.26x10 <sup>-43</sup> |

Table SI. Continued.

| Gene     | logFC     | FDR                    | P-value                |
|----------|-----------|------------------------|------------------------|
| MYO1G    | 1.872697  | 2.74x10 <sup>-43</sup> | 1.06x10 <sup>-45</sup> |
| CD28     | 1.904912  | 4.35x10 <sup>-37</sup> | 5.54x10 <sup>-39</sup> |
| ADGRE1   | 1.654491  | 7.09x10 <sup>-29</sup> | 1.72x10 <sup>-30</sup> |
| SPIC     | 2.167727  | 2.42x10 <sup>-10</sup> | 1.94x10 <sup>-11</sup> |
| MS4A4A   | 1.865196  | 4.64x10 <sup>-37</sup> | 6.03x10 <sup>-39</sup> |
| PEG10    | -1.354107 | 1.99x10 <sup>-02</sup> | 9.06x10 <sup>-03</sup> |
| PRAM1    | 1.476496  | 4.04x10 <sup>-33</sup> | 7.47x10 <sup>-35</sup> |
| MEFV     | 1.422346  | 5.06x10 <sup>-21</sup> | 1.95x10 <sup>-22</sup> |
| TESPA1   | 2.106401  | 5.24x10 <sup>-40</sup> | 3.97x10 <sup>-42</sup> |
| ACAP1    | 1.512666  | 2.79x10 <sup>-31</sup> | 5.87x10 <sup>-33</sup> |
| ARHGAP25 | 1.795412  | 9.89x10 <sup>-47</sup> | 8.48x10 <sup>-50</sup> |
| CD48     | 2.346672  | 9.78x10 <sup>-49</sup> | 1.72x10 <sup>-52</sup> |
| HBD      | 1.390494  | 9.82x10 <sup>-03</sup> | 3.99x10 <sup>-03</sup> |
| NTRK1    | 1.095978  | 3.95x10 <sup>-17</sup> | 1.90x10 <sup>-18</sup> |
| FAM20A   | 1.020391  | 1.52x10 <sup>-22</sup> | 5.38x10 <sup>-24</sup> |
| MAFB     | 1.207497  | 1.79x10 <sup>-27</sup> | 4.59x10 <sup>-29</sup> |
| FXD4     | -2.950084 | 6.62x10 <sup>-07</sup> | 8.69x10 <sup>-08</sup> |
| ADAMTSL3 | 1.106546  | 5.50x10 <sup>-10</sup> | 4.62x10 <sup>-11</sup> |
| SAMSN1   | 1.847289  | 7.36x10 <sup>-46</sup> | 1.14x10 <sup>-48</sup> |
| ABCA9    | 1.228470  | 4.18x10 <sup>-08</sup> | 4.46x10 <sup>-09</sup> |
| MYT1     | -1.476158 | 2.02x10 <sup>-02</sup> | 9.25x10 <sup>-03</sup> |
| CYP2W1   | -1.464726 | 8.65x10 <sup>-03</sup> | 3.44x10 <sup>-03</sup> |
| CCR7     | 2.506095  | 2.24x10 <sup>-32</sup> | 4.39x10 <sup>-34</sup> |
| CAMKV    | -1.931159 | 3.10x10 <sup>-03</sup> | 1.06x10 <sup>-03</sup> |
| SUCNR1   | 1.808910  | 1.10x10 <sup>-18</sup> | 4.81x10 <sup>-20</sup> |
| SLC1A3   | 1.173881  | 4.17x10 <sup>-21</sup> | 1.59x10 <sup>-22</sup> |
| CARTPT   | 1.887144  | 4.81x10 <sup>-03</sup> | 1.75x10 <sup>-03</sup> |
| VEGFD    | 2.193883  | 2.09x10 <sup>-05</sup> | 3.80x10 <sup>-06</sup> |
| BPI      | 1.664934  | 8.60x10 <sup>-05</sup> | 1.82x10 <sup>-05</sup> |
| TRIM71   | -2.161841 | 5.83x10 <sup>-03</sup> | 2.17x10 <sup>-03</sup> |
| RGS18    | 1.903619  | 8.14x10 <sup>-42</sup> | 4.19x10 <sup>-44</sup> |
| CR1      | 2.454053  | 1.50x10 <sup>-32</sup> | 2.90x10 <sup>-34</sup> |
| DLL3     | -1.364582 | 2.11x10 <sup>-02</sup> | 9.74x10 <sup>-03</sup> |
| SLA      | 2.010769  | 8.30x10 <sup>-47</sup> | 5.93x10 <sup>-50</sup> |
| KLRK1    | 1.577354  | 6.50x10 <sup>-17</sup> | 3.18x10 <sup>-18</sup> |
| RNASE3   | 2.651427  | 7.28x10 <sup>-08</sup> | 8.17x10 <sup>-09</sup> |
| RFTN1    | 1.113394  | 4.44x10 <sup>-24</sup> | 1.42x10 <sup>-25</sup> |
| HTRA4    | 1.388326  | 1.26x10 <sup>-19</sup> | 5.28x10 <sup>-21</sup> |
| DACT2    | -1.574267 | 2.51x10 <sup>-02</sup> | 1.20x10 <sup>-02</sup> |
| KLHDC7B  | 1.373891  | 2.19x10 <sup>-20</sup> | 8.84x10 <sup>-22</sup> |
| IGF2BP1  | -1.312244 | 1.46x10 <sup>-03</sup> | 4.45x10 <sup>-04</sup> |
| ABI3BP   | 1.645055  | 1.15x10 <sup>-15</sup> | 6.09x10 <sup>-17</sup> |
| DUSP9    | -2.460438 | 1.88x10 <sup>-09</sup> | 1.68x10 <sup>-10</sup> |
| CIITA    | 1.636095  | 3.82x10 <sup>-26</sup> | 1.09x10 <sup>-27</sup> |
| CEL      | -3.684633 | 2.51x10 <sup>-02</sup> | 1.20x10 <sup>-02</sup> |
| PLXDC2   | 1.036920  | 1.28x10 <sup>-14</sup> | 7.26x10 <sup>-16</sup> |
| NLRC4    | 1.143679  | 3.72x10 <sup>-32</sup> | 7.39x10 <sup>-34</sup> |
| NRROS    | 1.271525  | 3.63x10 <sup>-32</sup> | 7.19x10 <sup>-34</sup> |
| CXCR4    | 1.399147  | 1.06x10 <sup>-26</sup> | 2.86x10 <sup>-28</sup> |
| VSIG4    | 1.774237  | 7.78x10 <sup>-27</sup> | 2.09x10 <sup>-28</sup> |
| TNFSF14  | 1.161806  | 1.84x10 <sup>-24</sup> | 5.82x10 <sup>-26</sup> |
| WIPF1    | 1.426553  | 2.90x10 <sup>-39</sup> | 2.57x10 <sup>-41</sup> |
| RAB33A   | 1.528129  | 2.67x10 <sup>-39</sup> | 2.35x10 <sup>-41</sup> |
| SERPINA9 | 5.893988  | 6.19x10 <sup>-08</sup> | 6.82x10 <sup>-09</sup> |
| DTHD1    | 2.142087  | 1.79x10 <sup>-30</sup> | 3.88x10 <sup>-32</sup> |
| REM1     | 1.029515  | 3.54x10 <sup>-13</sup> | 2.20x10 <sup>-14</sup> |
| TM6SF1   | 1.469074  | 2.25x10 <sup>-33</sup> | 4.06x10 <sup>-35</sup> |
| IL2RG    | 1.083290  | 1.22x10 <sup>-15</sup> | 6.50x10 <sup>-17</sup> |
| MNDA     | 1.877463  | 1.74x10 <sup>-40</sup> | 1.13x10 <sup>-42</sup> |

Table SI. Continued.

| Gene     | logFC     | FDR                    | P-value                |
|----------|-----------|------------------------|------------------------|
| ULBP1    | -1.252442 | 3.70x10 <sup>-05</sup> | 7.13x10 <sup>-06</sup> |
| HAP1     | -2.461934 | 9.72x10 <sup>-03</sup> | 3.94x10 <sup>-03</sup> |
| CD3D     | 2.059161  | 2.14x10 <sup>-42</sup> | 9.79x10 <sup>-45</sup> |
| BCHE     | 1.081477  | 1.79x10 <sup>-02</sup> | 8.04x10 <sup>-03</sup> |
| CLC      | 2.846407  | 3.14x10 <sup>-10</sup> | 2.54x10 <sup>-11</sup> |
| MGP      | 1.242265  | 3.22x10 <sup>-08</sup> | 3.38x10 <sup>-09</sup> |
| PNMT     | -2.600593 | 3.41x10 <sup>-11</sup> | 2.50x10 <sup>-12</sup> |
| FCGR1B   | 1.625539  | 2.63x10 <sup>-27</sup> | 6.88x10 <sup>-29</sup> |
| RHBG     | -1.352425 | 1.16x10 <sup>-05</sup> | 2.00x10 <sup>-06</sup> |
| CD96     | 1.983919  | 1.71x10 <sup>-40</sup> | 1.10x10 <sup>-42</sup> |
| HLA-DPB1 | 1.802436  | 2.19x10 <sup>-39</sup> | 1.91x10 <sup>-41</sup> |
| TNFRSF4  | 1.019166  | 4.77x10 <sup>-19</sup> | 2.05x10 <sup>-20</sup> |
| KCNK12   | 1.029937  | 1.66x10 <sup>-11</sup> | 1.19x10 <sup>-12</sup> |
| ADAMDEC1 | 2.216864  | 6.54x10 <sup>-33</sup> | 1.23x10 <sup>-34</sup> |
| ZNF804A  | 1.538857  | 3.85x10 <sup>-25</sup> | 1.17x10 <sup>-26</sup> |
| KRT32    | -2.017563 | 7.90x10 <sup>-03</sup> | 3.09x10 <sup>-03</sup> |
| TFEC     | 1.624611  | 1.89x10 <sup>-35</sup> | 2.82x10 <sup>-37</sup> |
| FPR3     | 1.825405  | 1.33x10 <sup>-36</sup> | 1.78x10 <sup>-38</sup> |
| EBF1     | 1.052004  | 9.50x10 <sup>-10</sup> | 8.21x10 <sup>-11</sup> |
| PAGE1    | -1.280432 | 5.82x10 <sup>-04</sup> | 1.56x10 <sup>-04</sup> |
| ACKR1    | 1.482658  | 8.18x10 <sup>-11</sup> | 6.21x10 <sup>-12</sup> |
| SPIB     | 3.033809  | 6.12x10 <sup>-10</sup> | 5.19x10 <sup>-11</sup> |
| KRT6B    | -1.274532 | 1.20x10 <sup>-03</sup> | 3.56x10 <sup>-04</sup> |
| LAX1     | 2.050533  | 6.48x10 <sup>-33</sup> | 1.21x10 <sup>-34</sup> |
| SLC5A12  | -1.265872 | 5.93x10 <sup>-08</sup> | 6.51x10 <sup>-09</sup> |
| MFAP5    | 1.073529  | 2.63x10 <sup>-07</sup> | 3.21x10 <sup>-08</sup> |
| CST7     | 1.297911  | 8.19x10 <sup>-37</sup> | 1.08x10 <sup>-38</sup> |
| TCL1A    | 3.013788  | 1.38x10 <sup>-15</sup> | 7.38x10 <sup>-17</sup> |
| CLEC10A  | 2.099829  | 3.73x10 <sup>-30</sup> | 8.21x10 <sup>-32</sup> |
| APOC3    | -1.212206 | 4.82x10 <sup>-02</sup> | 2.59x10 <sup>-02</sup> |
| CERKL    | 1.036771  | 1.92x10 <sup>-27</sup> | 4.94x10 <sup>-29</sup> |
| PLAC1    | -1.085479 | 2.18x10 <sup>-03</sup> | 7.04x10 <sup>-04</sup> |
| DNASE2B  | 1.286849  | 4.25x10 <sup>-07</sup> | 5.37x10 <sup>-08</sup> |
| AZU1     | 4.477924  | 3.70x10 <sup>-03</sup> | 1.29x10 <sup>-03</sup> |
| TSHR     | 1.235250  | 7.46x10 <sup>-15</sup> | 4.17x10 <sup>-16</sup> |
| MATN4    | -1.233367 | 1.43x10 <sup>-04</sup> | 3.23x10 <sup>-05</sup> |
| GKN2     | 1.052996  | 2.60x10 <sup>-03</sup> | 8.66x10 <sup>-04</sup> |
| TRAF3IP3 | 2.148060  | 1.31x10 <sup>-43</sup> | 4.87x10 <sup>-46</sup> |
| AQP4     | 1.365382  | 4.72x10 <sup>-02</sup> | 2.53x10 <sup>-02</sup> |
| PADI1    | -1.295356 | 2.98x10 <sup>-04</sup> | 7.33x10 <sup>-05</sup> |
| KCNN3    | 1.377677  | 1.59x10 <sup>-18</sup> | 7.05x10 <sup>-20</sup> |
| ANKRD18B | -1.445574 | 5.12x10 <sup>-06</sup> | 8.07x10 <sup>-07</sup> |
| ZNF280A  | -1.177689 | 1.67x10 <sup>-03</sup> | 5.18x10 <sup>-04</sup> |
| MEI1     | 1.444697  | 4.54x10 <sup>-26</sup> | 1.30x10 <sup>-27</sup> |
| LY96     | 1.252901  | 2.19x10 <sup>-34</sup> | 3.62x10 <sup>-36</sup> |
| TLR10    | 2.851460  | 1.53x10 <sup>-23</sup> | 5.09x10 <sup>-25</sup> |
| FDCSP    | 2.891816  | 7.08x10 <sup>-09</sup> | 6.84x10 <sup>-10</sup> |
| SPN      | 1.809707  | 2.95x10 <sup>-37</sup> | 3.71x10 <sup>-39</sup> |
| SLC15A3  | 1.128519  | 2.66x10 <sup>-27</sup> | 6.97x10 <sup>-29</sup> |
| POU6F2   | -1.062949 | 1.02x10 <sup>-02</sup> | 4.15x10 <sup>-03</sup> |
| ZNF683   | 2.533698  | 4.91x10 <sup>-21</sup> | 1.89x10 <sup>-22</sup> |
| GRAP     | 1.056737  | 1.29x10 <sup>-18</sup> | 5.65x10 <sup>-20</sup> |
| IL9R     | 1.695204  | 1.62x10 <sup>-26</sup> | 4.47x10 <sup>-28</sup> |
| CADM3    | 1.808510  | 1.17x10 <sup>-11</sup> | 8.19x10 <sup>-13</sup> |
| MAGEA1   | -1.017158 | 4.07x10 <sup>-04</sup> | 1.05x10 <sup>-04</sup> |
| MAP4K1   | 2.191573  | 5.85x10 <sup>-39</sup> | 5.60x10 <sup>-41</sup> |
| ENPP2    | 1.096444  | 1.78x10 <sup>-19</sup> | 7.50x10 <sup>-21</sup> |
| CILP     | 1.593214  | 2.94x10 <sup>-11</sup> | 2.14x10 <sup>-12</sup> |
| DLX5     | -1.824064 | 3.12x10 <sup>-02</sup> | 1.55x10 <sup>-02</sup> |

Table SI. Continued.

| Gene      | logFC     | FDR                    | P-value                |
|-----------|-----------|------------------------|------------------------|
| OBP2B     | -4.611505 | 3.85x10 <sup>-05</sup> | 7.48x10 <sup>-06</sup> |
| PROC      | -1.302611 | 2.24x10 <sup>-05</sup> | 4.12x10 <sup>-06</sup> |
| PRR36     | -1.972018 | 1.85x10 <sup>-09</sup> | 1.66x10 <sup>-10</sup> |
| NKG7      | 2.251028  | 2.13x10 <sup>-36</sup> | 2.89x10 <sup>-38</sup> |
| CCL11     | 1.120343  | 2.33x10 <sup>-16</sup> | 1.18x10 <sup>-17</sup> |
| P2RY12    | 2.238555  | 1.13x10 <sup>-27</sup> | 2.89x10 <sup>-29</sup> |
| PRAME     | -1.423028 | 6.32x10 <sup>-03</sup> | 2.39x10 <sup>-03</sup> |
| CLDN6     | -2.093533 | 4.11x10 <sup>-04</sup> | 1.06x10 <sup>-04</sup> |
| HLA-DRB5  | 1.625128  | 9.34x10 <sup>-21</sup> | 3.67x10 <sup>-22</sup> |
| HTR2A     | 1.149661  | 1.40x10 <sup>-09</sup> | 1.24x10 <sup>-10</sup> |
| CD1A      | 1.131877  | 1.68x10 <sup>-10</sup> | 1.33x10 <sup>-11</sup> |
| VSTM1     | 1.088722  | 7.74x10 <sup>-08</sup> | 8.70x10 <sup>-09</sup> |
| XCL2      | 1.822016  | 3.17x10 <sup>-23</sup> | 1.09x10 <sup>-24</sup> |
| BLK       | 2.630764  | 9.82x10 <sup>-17</sup> | 4.87x10 <sup>-18</sup> |
| MCEMP1    | 1.285907  | 1.61x10 <sup>-06</sup> | 2.27x10 <sup>-07</sup> |
| PYHIN1    | 2.143272  | 9.01x10 <sup>-39</sup> | 8.95x10 <sup>-41</sup> |
| TXLNB     | 1.084836  | 1.36x10 <sup>-17</sup> | 6.39x10 <sup>-19</sup> |
| ADGRE2    | 1.383220  | 2.41x10 <sup>-25</sup> | 7.20x10 <sup>-27</sup> |
| THEMIS    | 2.208109  | 1.38x10 <sup>-38</sup> | 1.41x10 <sup>-40</sup> |
| KMO       | 1.413787  | 3.57x10 <sup>-28</sup> | 8.87x10 <sup>-30</sup> |
| C20orf204 | -1.779184 | 1.75x10 <sup>-03</sup> | 5.46x10 <sup>-04</sup> |
| PLXNB3    | -1.098870 | 4.40x10 <sup>-05</sup> | 8.70x10 <sup>-06</sup> |
| MATK      | 1.297635  | 1.92x10 <sup>-29</sup> | 4.45x10 <sup>-31</sup> |
| LRRK2     | 1.302259  | 2.53x10 <sup>-23</sup> | 8.56x10 <sup>-25</sup> |
| ACP5      | 1.164848  | 1.55x10 <sup>-26</sup> | 4.26x10 <sup>-28</sup> |
| NAIP      | 1.569840  | 1.50x10 <sup>-26</sup> | 4.11x10 <sup>-28</sup> |
| TNFAIP8L2 | 1.615119  | 1.37x10 <sup>-44</sup> | 3.72x10 <sup>-47</sup> |
| SELP      | 1.362904  | 3.63x10 <sup>-13</sup> | 2.26x10 <sup>-14</sup> |
| PIK3CD    | 1.400115  | 3.13x10 <sup>-30</sup> | 6.85x10 <sup>-32</sup> |
| GPR88     | 1.064793  | 8.30x10 <sup>-09</sup> | 8.04x10 <sup>-10</sup> |
| P3H4      | -1.346792 | 1.99x10 <sup>-08</sup> | 2.03x10 <sup>-09</sup> |
| NODAL     | -1.503565 | 4.67x10 <sup>-02</sup> | 2.50x10 <sup>-02</sup> |
| KCNJ5     | 1.481891  | 1.58x10 <sup>-22</sup> | 5.62x10 <sup>-24</sup> |
| PGAP3     | -1.456664 | 6.22x10 <sup>-06</sup> | 1.00x10 <sup>-06</sup> |
| TTPA      | -1.775338 | 7.91x10 <sup>-07</sup> | 1.05x10 <sup>-07</sup> |
| THBS4     | 1.672482  | 6.52x10 <sup>-08</sup> | 7.23x10 <sup>-09</sup> |
| CTSW      | 1.829130  | 1.90x10 <sup>-27</sup> | 4.88x10 <sup>-29</sup> |
| NCF4      | 1.473204  | 2.11x10 <sup>-37</sup> | 2.55x10 <sup>-39</sup> |
| POU2AF1   | 2.045895  | 9.13x10 <sup>-22</sup> | 3.35x10 <sup>-23</sup> |
| S1PR4     | 1.905952  | 9.14x10 <sup>-33</sup> | 1.74x10 <sup>-34</sup> |
| GFY       | -1.626220 | 2.38x10 <sup>-06</sup> | 3.50x10 <sup>-07</sup> |
| DAZL      | 2.059447  | 1.46x10 <sup>-18</sup> | 6.44x10 <sup>-20</sup> |
| SYT7      | -1.420969 | 1.91x10 <sup>-06</sup> | 2.75x10 <sup>-07</sup> |
| DNAJC5B   | 2.017977  | 2.21x10 <sup>-37</sup> | 2.70x10 <sup>-39</sup> |
| STK31     | -1.140781 | 9.02x10 <sup>-04</sup> | 2.57x10 <sup>-04</sup> |
| MCOLN3    | -1.065747 | 1.58x10 <sup>-03</sup> | 4.87x10 <sup>-04</sup> |
| CD14      | 1.437552  | 9.44x10 <sup>-35</sup> | 1.50x10 <sup>-36</sup> |
| PLCG2     | 1.275166  | 8.62x10 <sup>-20</sup> | 3.56x10 <sup>-21</sup> |
| DNMT3B    | -1.248364 | 1.42x10 <sup>-08</sup> | 1.42x10 <sup>-09</sup> |
| CTCFL     | -1.879918 | 7.89x10 <sup>-04</sup> | 2.20x10 <sup>-04</sup> |
| CCL25     | 1.158154  | 1.14x10 <sup>-05</sup> | 1.96x10 <sup>-06</sup> |
| RARRES3   | 1.280293  | 1.36x10 <sup>-18</sup> | 6.01x10 <sup>-20</sup> |
| CX3CR1    | 1.674483  | 2.87x10 <sup>-14</sup> | 1.66x10 <sup>-15</sup> |
| NUGGC     | 1.794856  | 2.28x10 <sup>-22</sup> | 8.11x10 <sup>-24</sup> |
| GGT5      | 1.029234  | 6.22x10 <sup>-13</sup> | 3.94x10 <sup>-14</sup> |
| CNFN      | -1.942107 | 2.83x10 <sup>-04</sup> | 6.89x10 <sup>-05</sup> |
| FGG       | -2.510925 | 2.86x10 <sup>-02</sup> | 1.40x10 <sup>-02</sup> |
| SNTB1     | -1.028996 | 9.63x10 <sup>-03</sup> | 3.90x10 <sup>-03</sup> |
| CLEC17A   | 3.078602  | 7.24x10 <sup>-17</sup> | 3.55x10 <sup>-18</sup> |

Table SI. Continued.

| Gene      | logFC     | FDR                    | P-value                |
|-----------|-----------|------------------------|------------------------|
| FMO1      | 1.413100  | 9.80x10 <sup>-12</sup> | 6.83x10 <sup>-13</sup> |
| UBASH3A   | 1.917826  | 2.90x10 <sup>-38</sup> | 3.05x10 <sup>-40</sup> |
| PRRG3     | 1.835260  | 4.47x10 <sup>-02</sup> | 2.37x10 <sup>-02</sup> |
| GCSAML    | 1.033366  | 1.91x10 <sup>-08</sup> | 1.95x10 <sup>-09</sup> |
| TNFRSF13B | 2.503429  | 1.09x10 <sup>-20</sup> | 4.30x10 <sup>-22</sup> |
| SPRR2G    | -3.376741 | 3.95x10 <sup>-03</sup> | 1.40x10 <sup>-03</sup> |
| SLC22A9   | -1.035217 | 1.07x10 <sup>-02</sup> | 4.42x10 <sup>-03</sup> |
| SLC9A9    | 1.419398  | 5.56x10 <sup>-29</sup> | 1.34x10 <sup>-30</sup> |
| TMPRSS5   | -1.539682 | 9.81x10 <sup>-05</sup> | 2.12x10 <sup>-05</sup> |
| OXT       | -1.024807 | 3.71x10 <sup>-02</sup> | 1.91x10 <sup>-02</sup> |
| PSORS1C2  | -1.554931 | 2.56x10 <sup>-06</sup> | 3.80x10 <sup>-07</sup> |
| POU2F2    | 1.714425  | 7.47x10 <sup>-18</sup> | 3.44x10 <sup>-19</sup> |
| AIM2      | 1.921325  | 1.58x10 <sup>-29</sup> | 3.63x10 <sup>-31</sup> |
| OR2I1P    | 1.540657  | 1.46x10 <sup>-11</sup> | 1.03x10 <sup>-12</sup> |
| KIF19     | 1.168506  | 3.49x10 <sup>-12</sup> | 2.36x10 <sup>-13</sup> |
| IGSF6     | 1.636486  | 4.52x10 <sup>-39</sup> | 4.24x10 <sup>-41</sup> |
| GNLY      | 1.633186  | 1.36x10 <sup>-16</sup> | 6.80x10 <sup>-18</sup> |
| ITK       | 2.274202  | 1.85x10 <sup>-40</sup> | 1.22x10 <sup>-42</sup> |
| FAM83C    | -1.253270 | 1.67x10 <sup>-04</sup> | 3.82x10 <sup>-05</sup> |
| ARHGEF6   | 1.490511  | 1.82x10 <sup>-35</sup> | 2.71x10 <sup>-37</sup> |
| GLIPR1    | 1.062733  | 1.20x10 <sup>-22</sup> | 4.21x10 <sup>-24</sup> |
| RNF182    | -2.105662 | 4.01x10 <sup>-02</sup> | 2.09x10 <sup>-02</sup> |
| GRAP2     | 1.741226  | 2.81x10 <sup>-35</sup> | 4.23x10 <sup>-37</sup> |
| INHA      | -3.486749 | 8.33x10 <sup>-07</sup> | 1.11x10 <sup>-07</sup> |
| TLR6      | 1.419279  | 9.12x10 <sup>-29</sup> | 2.24x10 <sup>-30</sup> |
| SCML4     | 1.190088  | 6.73x10 <sup>-18</sup> | 3.09x10 <sup>-19</sup> |
| PSTPIP1   | 1.385633  | 3.13x10 <sup>-36</sup> | 4.29x10 <sup>-38</sup> |
| MUC22     | -1.769920 | 1.01x10 <sup>-02</sup> | 4.14x10 <sup>-03</sup> |
| DSG1      | -2.465163 | 4.18x10 <sup>-04</sup> | 1.08x10 <sup>-04</sup> |
| RASAL3    | 1.857493  | 2.01x10 <sup>-40</sup> | 1.33x10 <sup>-42</sup> |
| GBP4      | 1.916089  | 1.24x10 <sup>-26</sup> | 3.39x10 <sup>-28</sup> |
| PLCB2     | 1.136474  | 5.75x10 <sup>-29</sup> | 1.39x10 <sup>-30</sup> |
| PTPN22    | 1.288382  | 8.89x10 <sup>-35</sup> | 1.40x10 <sup>-36</sup> |
| LINGO3    | 1.533984  | 1.73x10 <sup>-09</sup> | 1.54x10 <sup>-10</sup> |
| VSIG8     | -1.444823 | 3.18x10 <sup>-04</sup> | 7.90x10 <sup>-05</sup> |
| C1QA      | 1.964342  | 1.07x10 <sup>-40</sup> | 6.49x10 <sup>-43</sup> |
| CD1B      | 1.776979  | 1.13x10 <sup>-19</sup> | 4.71x10 <sup>-21</sup> |
| ZNF750    | -1.128205 | 2.64x10 <sup>-04</sup> | 6.38x10 <sup>-05</sup> |
| FABP4     | 1.167507  | 6.59x10 <sup>-07</sup> | 8.64x10 <sup>-08</sup> |
| FAM216B   | 1.814437  | 5.19x10 <sup>-09</sup> | 4.93x10 <sup>-10</sup> |
| HS3ST2    | 1.448374  | 9.29x10 <sup>-12</sup> | 6.46x10 <sup>-13</sup> |
| DAPL1     | -1.172993 | 3.19x10 <sup>-02</sup> | 1.60x10 <sup>-02</sup> |
| NYAP1     | -1.036041 | 1.77x10 <sup>-03</sup> | 5.52x10 <sup>-04</sup> |
| PPP1R14C  | -1.183640 | 2.20x10 <sup>-06</sup> | 3.22x10 <sup>-07</sup> |
| CCL3      | 1.530535  | 3.40x10 <sup>-17</sup> | 1.63x10 <sup>-18</sup> |
| ARHGAP30  | 1.620073  | 5.35x10 <sup>-41</sup> | 3.06x10 <sup>-43</sup> |
| PARP15    | 1.877265  | 2.22x10 <sup>-19</sup> | 9.41x10 <sup>-21</sup> |
| KRTAP3-1  | -5.579197 | 2.10x10 <sup>-06</sup> | 3.05x10 <sup>-07</sup> |
| OXGR1     | -1.465957 | 3.93x10 <sup>-03</sup> | 1.39x10 <sup>-03</sup> |
| MOGAT1    | -1.453488 | 1.35x10 <sup>-02</sup> | 5.79x10 <sup>-03</sup> |
| ABCA8     | 1.426601  | 5.19x10 <sup>-08</sup> | 5.64x10 <sup>-09</sup> |
| TBX4      | -1.286298 | 2.99x10 <sup>-04</sup> | 7.36x10 <sup>-05</sup> |
| LILRB1    | 1.729164  | 6.29x10 <sup>-45</sup> | 1.48x10 <sup>-47</sup> |
| TBX21     | 1.851518  | 2.78x10 <sup>-35</sup> | 4.17x10 <sup>-37</sup> |
| IL12RB1   | 1.629271  | 1.49x10 <sup>-38</sup> | 1.54x10 <sup>-40</sup> |
| CYSLTR1   | 1.534270  | 1.16x10 <sup>-31</sup> | 2.37x10 <sup>-33</sup> |
| CXCL9     | 2.457875  | 5.47x10 <sup>-23</sup> | 1.88x10 <sup>-24</sup> |
| TMPRSS13  | -1.996873 | 1.47x10 <sup>-02</sup> | 6.36x10 <sup>-03</sup> |
| CD1D      | 1.514887  | 5.99x10 <sup>-32</sup> | 1.21x10 <sup>-33</sup> |

Table SI. Continued.

| Gene      | logFC     | FDR                    | P-value                |
|-----------|-----------|------------------------|------------------------|
| ADCYAP1R1 | 1.356428  | 7.65x10 <sup>-07</sup> | 1.02x10 <sup>-07</sup> |
| IL10RA    | 2.113852  | 4.53x10 <sup>-47</sup> | 2.27x10 <sup>-50</sup> |
| AHSG      | -4.116170 | 1.72x10 <sup>-03</sup> | 5.34x10 <sup>-04</sup> |
| GBP5      | 2.482350  | 1.47x10 <sup>-33</sup> | 2.60x10 <sup>-35</sup> |
| ANKRD33B  | 1.474187  | 7.24x10 <sup>-17</sup> | 3.55x10 <sup>-18</sup> |
| HTR2C     | -2.050689 | 5.76x10 <sup>-06</sup> | 9.17x10 <sup>-07</sup> |
| CXCL11    | 2.288870  | 8.10x10 <sup>-16</sup> | 4.25x10 <sup>-17</sup> |
| CPB2      | -1.770470 | 3.76x10 <sup>-04</sup> | 9.56x10 <sup>-05</sup> |
| RNASE6    | 1.857535  | 2.14x10 <sup>-42</sup> | 9.94x10 <sup>-45</sup> |
| MEOX1     | 1.220698  | 3.01x10 <sup>-14</sup> | 1.74x10 <sup>-15</sup> |
| HOXC13    | -1.627734 | 1.94x10 <sup>-06</sup> | 2.80x10 <sup>-07</sup> |
| HLA-DQB2  | 2.151963  | 1.30x10 <sup>-26</sup> | 3.55x10 <sup>-28</sup> |
| RTN1      | 1.344289  | 2.84x10 <sup>-23</sup> | 9.70x10 <sup>-25</sup> |
| P2RX7     | 1.461996  | 1.29x10 <sup>-35</sup> | 1.86x10 <sup>-37</sup> |
| WNT11     | -1.675234 | 3.39x10 <sup>-03</sup> | 1.17x10 <sup>-03</sup> |
| PLEK      | 2.166624  | 7.10x10 <sup>-44</sup> | 2.30x10 <sup>-46</sup> |
| CD300E    | 1.334639  | 9.96x10 <sup>-10</sup> | 8.63x10 <sup>-11</sup> |
| SULT4A1   | -1.134442 | 3.28x10 <sup>-03</sup> | 1.13x10 <sup>-03</sup> |
| RGS1      | 1.623271  | 1.58x10 <sup>-29</sup> | 3.63x10 <sup>-31</sup> |
| FCRLA     | 3.435248  | 2.32x10 <sup>-23</sup> | 7.82x10 <sup>-25</sup> |
| CD40      | 1.078634  | 4.15x10 <sup>-18</sup> | 1.88x10 <sup>-19</sup> |
| TMIGD3    | 1.574394  | 6.31x10 <sup>-27</sup> | 1.68x10 <sup>-28</sup> |
| CCL17     | 1.521848  | 5.91x10 <sup>-19</sup> | 2.57x10 <sup>-20</sup> |
| PCLO      | -1.669338 | 1.02x10 <sup>-03</sup> | 2.98x10 <sup>-04</sup> |
| FCRL2     | 2.556133  | 1.09x10 <sup>-20</sup> | 4.30x10 <sup>-22</sup> |
| LRRC25    | 1.519139  | 1.37x10 <sup>-38</sup> | 1.39x10 <sup>-40</sup> |
| KRT17     | -1.458868 | 1.04x10 <sup>-04</sup> | 2.25x10 <sup>-05</sup> |
| IL18RAP   | 1.558539  | 2.06x10 <sup>-29</sup> | 4.80x10 <sup>-31</sup> |
| RAET1L    | -1.152438 | 4.69x10 <sup>-05</sup> | 9.34x10 <sup>-06</sup> |
| RSAD2     | 1.075661  | 7.27x10 <sup>-11</sup> | 5.50x10 <sup>-12</sup> |
| DLX2      | -4.037006 | 1.43x10 <sup>-02</sup> | 6.16x10 <sup>-03</sup> |
| CLPSL2    | -1.490503 | 1.92x10 <sup>-06</sup> | 2.77x10 <sup>-07</sup> |
| GAPT      | 2.471187  | 9.51x10 <sup>-30</sup> | 2.15x10 <sup>-31</sup> |
| MROH2A    | -1.382923 | 3.74x10 <sup>-03</sup> | 1.31x10 <sup>-03</sup> |
| LILRB5    | 1.566084  | 6.70x10 <sup>-24</sup> | 2.16x10 <sup>-25</sup> |
| AMPD1     | 1.817984  | 3.47x10 <sup>-15</sup> | 1.90x10 <sup>-16</sup> |
| SCN2B     | 1.032106  | 3.13x10 <sup>-03</sup> | 1.07x10 <sup>-03</sup> |
| RIPPLY3   | -1.543119 | 1.52x10 <sup>-07</sup> | 1.79x10 <sup>-08</sup> |
| STAB1     | 1.126506  | 7.80x10 <sup>-25</sup> | 2.41x10 <sup>-26</sup> |
| EVX1      | -1.400609 | 1.88x10 <sup>-04</sup> | 4.38x10 <sup>-05</sup> |
| TNFSF13B  | 1.586383  | 2.15x10 <sup>-36</sup> | 2.93x10 <sup>-38</sup> |
| CYP24A1   | -1.853605 | 9.74x10 <sup>-03</sup> | 3.95x10 <sup>-03</sup> |
| CD6       | 1.851939  | 1.67x10 <sup>-35</sup> | 2.46x10 <sup>-37</sup> |
| SLC34A2   | -1.621889 | 1.28x10 <sup>-04</sup> | 2.84x10 <sup>-05</sup> |
| TFAP2C    | -1.027024 | 2.08x10 <sup>-04</sup> | 4.90x10 <sup>-05</sup> |
| WFDC5     | -2.017932 | 1.09x10 <sup>-02</sup> | 4.48x10 <sup>-03</sup> |
| SPRR2A    | -1.869683 | 1.73x10 <sup>-02</sup> | 7.69x10 <sup>-03</sup> |
| EPYC      | 1.167092  | 2.61x10 <sup>-03</sup> | 8.69x10 <sup>-04</sup> |
| BCL2      | 1.030024  | 7.36x10 <sup>-19</sup> | 3.21x10 <sup>-20</sup> |
| CD300LF   | 1.821948  | 4.49x10 <sup>-39</sup> | 4.17x10 <sup>-41</sup> |
| C3AR1     | 1.856416  | 2.27x10 <sup>-41</sup> | 1.23x10 <sup>-43</sup> |
| VAV1      | 1.505887  | 7.95x10 <sup>-33</sup> | 1.50x10 <sup>-34</sup> |
| HOMER2    | -1.092806 | 4.10x10 <sup>-05</sup> | 8.02x10 <sup>-06</sup> |
| IGFLR1    | 1.112764  | 1.69x10 <sup>-25</sup> | 4.99x10 <sup>-27</sup> |

FC, fold-change; FDR, false discovery rate.

Table SII. Differentially expressed genes with regard to stromal scores.

| Gene      | logFC     | P-value                | FDR                    |
|-----------|-----------|------------------------|------------------------|
| CYS1      | 1.653333  | 1.71x10 <sup>-21</sup> | 2.62x10 <sup>-20</sup> |
| GIMAP1    | 1.272629  | 3.66x10 <sup>-30</sup> | 1.84x10 <sup>-28</sup> |
| PAPPA2    | 2.105469  | 1.80x10 <sup>-02</sup> | 2.93x10 <sup>-02</sup> |
| CD274     | 1.251664  | 6.31x10 <sup>-06</sup> | 2.13x10 <sup>-05</sup> |
| TLR7      | 1.776843  | 5.49x10 <sup>-28</sup> | 1.95x10 <sup>-26</sup> |
| RHOJ      | 1.375344  | 2.86x10 <sup>-35</sup> | 3.68x10 <sup>-33</sup> |
| TSPAN11   | 1.608148  | 2.26x10 <sup>-25</sup> | 5.55x10 <sup>-24</sup> |
| PEBP4     | 1.411104  | 1.40x10 <sup>-14</sup> | 1.15x10 <sup>-13</sup> |
| COL15A1   | 1.386513  | 2.20x10 <sup>-31</sup> | 1.35x10 <sup>-29</sup> |
| HOXC12    | -1.570744 | 1.09x10 <sup>-04</sup> | 2.91x10 <sup>-04</sup> |
| FPR1      | 1.466284  | 9.66x10 <sup>-18</sup> | 1.05x10 <sup>-16</sup> |
| PDE4B     | 1.199007  | 9.68x10 <sup>-24</sup> | 1.96x10 <sup>-22</sup> |
| SLAMF7    | 1.157845  | 3.57x10 <sup>-12</sup> | 2.42x10 <sup>-11</sup> |
| ANOS1     | 1.264448  | 9.06x10 <sup>-25</sup> | 2.04x10 <sup>-23</sup> |
| FETUB     | -2.452144 | 1.97x10 <sup>-03</sup> | 4.02x10 <sup>-03</sup> |
| FAM180B   | 2.048133  | 9.79x10 <sup>-08</sup> | 4.28x10 <sup>-07</sup> |
| SPON1     | 1.878548  | 8.79x10 <sup>-27</sup> | 2.60x10 <sup>-25</sup> |
| APOD      | 1.601839  | 1.92x10 <sup>-15</sup> | 1.70x10 <sup>-14</sup> |
| CHODL     | 1.367237  | 6.77x10 <sup>-13</sup> | 4.84x10 <sup>-12</sup> |
| C14orf132 | 1.662313  | 4.08x10 <sup>-22</sup> | 6.60x10 <sup>-21</sup> |
| CXCR1     | 1.129905  | 2.83x10 <sup>-02</sup> | 4.38x10 <sup>-02</sup> |
| UGT2B17   | 1.735630  | 2.39x10 <sup>-02</sup> | 3.77x10 <sup>-02</sup> |
| FAP       | 1.673187  | 4.95x10 <sup>-34</sup> | 4.76x10 <sup>-32</sup> |
| LY86      | 1.564906  | 7.64x10 <sup>-30</sup> | 3.60x10 <sup>-28</sup> |
| THBS1     | 1.717242  | 2.00x10 <sup>-38</sup> | 6.50x10 <sup>-36</sup> |
| ZNF835    | 1.308416  | 5.68x10 <sup>-21</sup> | 8.23x10 <sup>-20</sup> |
| FCGR3B    | 1.062827  | 1.74x10 <sup>-02</sup> | 2.83x10 <sup>-02</sup> |
| GPR65     | 1.279883  | 3.19x10 <sup>-25</sup> | 7.71x10 <sup>-24</sup> |
| CRYAB     | 1.973489  | 2.25x10 <sup>-29</sup> | 9.78x10 <sup>-28</sup> |
| RAB9B     | 1.547568  | 7.13x10 <sup>-18</sup> | 7.80x10 <sup>-17</sup> |
| ZSCAN23   | 1.018846  | 7.91x10 <sup>-16</sup> | 7.26x10 <sup>-15</sup> |
| KRT16     | -2.633588 | 4.96x10 <sup>-03</sup> | 9.23x10 <sup>-03</sup> |
| TMEM35A   | 2.452276  | 1.87x10 <sup>-20</sup> | 2.57x10 <sup>-19</sup> |
| MYOCD     | 2.632528  | 1.79x10 <sup>-21</sup> | 2.72x10 <sup>-20</sup> |
| MYH11     | 3.400916  | 1.49x10 <sup>-23</sup> | 2.90x10 <sup>-22</sup> |
| GNAO1     | 2.285661  | 1.53x10 <sup>-26</sup> | 4.40x10 <sup>-25</sup> |
| TCEAL6    | 1.707338  | 4.78x10 <sup>-13</sup> | 3.46x10 <sup>-12</sup> |
| ADRB3     | 2.528602  | 1.00x10 <sup>-16</sup> | 9.94x10 <sup>-16</sup> |
| SETBP1    | 1.438763  | 1.12x10 <sup>-20</sup> | 1.58x10 <sup>-19</sup> |
| FAM78A    | 1.118251  | 4.16x10 <sup>-23</sup> | 7.66x10 <sup>-22</sup> |
| ADAMTS16  | 1.996278  | 5.31x10 <sup>-17</sup> | 5.39x10 <sup>-16</sup> |
| CYTIP     | 1.133776  | 2.56x10 <sup>-16</sup> | 2.45x10 <sup>-15</sup> |
| RIMS1     | 1.984844  | 3.78x10 <sup>-08</sup> | 1.74x10 <sup>-07</sup> |
| LSAMP     | 1.592509  | 3.30x10 <sup>-25</sup> | 7.97x10 <sup>-24</sup> |
| JUP       | -1.325623 | 3.06x10 <sup>-11</sup> | 1.91x10 <sup>-10</sup> |
| CD300A    | 1.013717  | 6.64x10 <sup>-20</sup> | 8.70x10 <sup>-19</sup> |
| SCUBE2    | 1.118908  | 9.22x10 <sup>-17</sup> | 9.19x10 <sup>-16</sup> |
| RASGRF2   | 1.036858  | 2.13x10 <sup>-30</sup> | 1.11x10 <sup>-28</sup> |
| IGLL5     | 1.043434  | 2.11x10 <sup>-09</sup> | 1.12x10 <sup>-08</sup> |
| MAP6      | 1.641293  | 3.04x10 <sup>-26</sup> | 8.46x10 <sup>-25</sup> |
| MUC5B     | -1.511369 | 4.99x10 <sup>-04</sup> | 1.16x10 <sup>-03</sup> |
| GFRA1     | 1.650116  | 4.28x10 <sup>-14</sup> | 3.36x10 <sup>-13</sup> |
| ST8SIA4   | 1.138903  | 2.89x10 <sup>-27</sup> | 9.28x10 <sup>-26</sup> |
| TWIST1    | 1.156810  | 5.16x10 <sup>-18</sup> | 5.71x10 <sup>-17</sup> |
| CTSK      | 1.643755  | 9.31x10 <sup>-40</sup> | 4.22x10 <sup>-37</sup> |
| CMYA5     | 1.359566  | 8.54x10 <sup>-18</sup> | 9.30x10 <sup>-17</sup> |
| DOK6      | 1.409980  | 2.99x10 <sup>-31</sup> | 1.79x10 <sup>-29</sup> |
| MPDZ      | 1.755576  | 4.23x10 <sup>-33</sup> | 3.38x10 <sup>-31</sup> |

Table SII. Continued.

| Gene     | logFC     | P-value                | FDR                    |
|----------|-----------|------------------------|------------------------|
| IGFN1    | 1.493994  | 1.62x10 <sup>-06</sup> | 6.03x10 <sup>-06</sup> |
| EPB41L3  | 1.098781  | 2.11x10 <sup>-23</sup> | 4.02x10 <sup>-22</sup> |
| ATP2B4   | 1.350866  | 1.75x10 <sup>-21</sup> | 2.67x10 <sup>-20</sup> |
| GPM6B    | 1.255359  | 1.60x10 <sup>-15</sup> | 1.43x10 <sup>-14</sup> |
| METTL24  | 2.355497  | 5.96x10 <sup>-25</sup> | 1.39x10 <sup>-23</sup> |
| HACD4    | 1.235829  | 2.45x10 <sup>-29</sup> | 1.06x10 <sup>-27</sup> |
| WFDC1    | 1.111251  | 1.79x10 <sup>-10</sup> | 1.05x10 <sup>-09</sup> |
| PREX2    | 1.135372  | 2.84x10 <sup>-20</sup> | 3.83x10 <sup>-19</sup> |
| GRHL3    | -1.735993 | 3.64x10 <sup>-06</sup> | 1.28x10 <sup>-05</sup> |
| NCF1     | 1.312509  | 1.39x10 <sup>-20</sup> | 1.93x10 <sup>-19</sup> |
| NAV3     | 1.556749  | 4.38x10 <sup>-27</sup> | 1.36x10 <sup>-25</sup> |
| ITGAM    | 1.335488  | 2.52x10 <sup>-23</sup> | 4.74x10 <sup>-22</sup> |
| ARRDC5   | 1.048964  | 2.23x10 <sup>-11</sup> | 1.41x10 <sup>-10</sup> |
| PNOC     | 1.419234  | 2.56x10 <sup>-17</sup> | 2.66x10 <sup>-16</sup> |
| GPR174   | 1.354749  | 1.28x10 <sup>-14</sup> | 1.05x10 <sup>-13</sup> |
| CELF2    | 1.478438  | 2.00x10 <sup>-26</sup> | 5.68x10 <sup>-25</sup> |
| CUBN     | 1.112320  | 5.17x10 <sup>-12</sup> | 3.47x10 <sup>-11</sup> |
| DEFB4A   | -1.529192 | 3.96x10 <sup>-03</sup> | 7.51x10 <sup>-03</sup> |
| FCGR1A   | 1.265825  | 1.36x10 <sup>-20</sup> | 1.90x10 <sup>-19</sup> |
| ADAMTS10 | 1.313440  | 6.58x10 <sup>-30</sup> | 3.16x10 <sup>-28</sup> |
| CDON     | 1.308102  | 6.95x10 <sup>-11</sup> | 4.20x10 <sup>-10</sup> |
| RORB     | 2.010212  | 6.80x10 <sup>-29</sup> | 2.78x10 <sup>-27</sup> |
| CSF3R    | 1.113921  | 3.69x10 <sup>-14</sup> | 2.90x10 <sup>-13</sup> |
| GPR68    | 1.279177  | 3.88x10 <sup>-32</sup> | 2.71x10 <sup>-30</sup> |
| TRPC1    | 1.099003  | 6.51x10 <sup>-20</sup> | 8.53x10 <sup>-19</sup> |
| PRUNE2   | 2.495990  | 3.95x10 <sup>-18</sup> | 4.39x10 <sup>-17</sup> |
| DPEP2    | 1.209659  | 1.64x10 <sup>-25</sup> | 4.09x10 <sup>-24</sup> |
| SCARA3   | 1.025095  | 4.08x10 <sup>-11</sup> | 2.52x10 <sup>-10</sup> |
| CNR1     | 1.674190  | 3.88x10 <sup>-15</sup> | 3.33x10 <sup>-14</sup> |
| KRT15    | -2.557773 | 1.70x10 <sup>-09</sup> | 9.10x10 <sup>-09</sup> |
| SLC2A4   | 2.228113  | 1.62x10 <sup>-12</sup> | 1.13x10 <sup>-11</sup> |
| NXPH3    | 1.652987  | 6.43x10 <sup>-23</sup> | 1.14x10 <sup>-21</sup> |
| LY6G6C   | -2.278391 | 3.85x10 <sup>-06</sup> | 1.35x10 <sup>-05</sup> |
| CD38     | 1.454478  | 1.17x10 <sup>-15</sup> | 1.06x10 <sup>-14</sup> |
| RGS4     | 1.499588  | 7.91x10 <sup>-25</sup> | 1.81x10 <sup>-23</sup> |
| EDNRA    | 1.560965  | 4.10x10 <sup>-36</sup> | 6.24x10 <sup>-34</sup> |
| GLIPR2   | 1.302697  | 8.14x10 <sup>-37</sup> | 1.51x10 <sup>-34</sup> |
| RGS5     | 1.089178  | 1.41x10 <sup>-16</sup> | 1.37x10 <sup>-15</sup> |
| AR       | 1.692535  | 1.83x10 <sup>-23</sup> | 3.52x10 <sup>-22</sup> |
| LPXN     | 1.095557  | 3.15x10 <sup>-19</sup> | 3.89x10 <sup>-18</sup> |
| SALL2    | 1.004831  | 2.52x10 <sup>-14</sup> | 2.02x10 <sup>-13</sup> |
| CRTAM    | 1.205956  | 2.41x10 <sup>-15</sup> | 2.12x10 <sup>-14</sup> |
| KLRD1    | 1.002362  | 2.06x10 <sup>-16</sup> | 1.99x10 <sup>-15</sup> |
| FOXP2    | 1.939567  | 2.27x10 <sup>-21</sup> | 3.42x10 <sup>-20</sup> |
| NMUR1    | 1.462256  | 2.42x10 <sup>-21</sup> | 3.62x10 <sup>-20</sup> |
| TUB      | 1.089828  | 1.38x10 <sup>-14</sup> | 1.13x10 <sup>-13</sup> |
| ATP12A   | -2.204618 | 1.10x10 <sup>-02</sup> | 1.89x10 <sup>-02</sup> |
| PCDHGA12 | 1.712583  | 6.11x10 <sup>-36</sup> | 8.74x10 <sup>-34</sup> |
| PTCRA    | 1.030211  | 7.92x10 <sup>-11</sup> | 4.76x10 <sup>-10</sup> |
| GAB3     | 1.199483  | 3.23x10 <sup>-28</sup> | 1.20x10 <sup>-26</sup> |
| C2orf40  | 3.489109  | 6.57x10 <sup>-24</sup> | 1.36x10 <sup>-22</sup> |
| HEPPL1   | -1.666453 | 1.70x10 <sup>-03</sup> | 3.53x10 <sup>-03</sup> |
| TBC1D10C | 1.177114  | 3.54x10 <sup>-16</sup> | 3.35x10 <sup>-15</sup> |
| EBF2     | 1.593694  | 1.94x10 <sup>-23</sup> | 3.69x10 <sup>-22</sup> |
| SYNE1    | 1.649505  | 3.00x10 <sup>-32</sup> | 2.13x10 <sup>-30</sup> |
| ITGBL1   | 2.384768  | 1.06x10 <sup>-33</sup> | 9.40x10 <sup>-32</sup> |
| RCAN2    | 1.763968  | 6.50x10 <sup>-28</sup> | 2.27x10 <sup>-26</sup> |
| AMBP     | -1.139957 | 1.10x10 <sup>-03</sup> | 2.38x10 <sup>-03</sup> |
| EVC      | 1.451009  | 8.37x10 <sup>-29</sup> | 3.38x10 <sup>-27</sup> |

Table SII. Continued.

| Gene      | logFC     | P-value                | FDR                    |
|-----------|-----------|------------------------|------------------------|
| SLITRK3   | 2.005877  | 2.76x10 <sup>-15</sup> | 2.40x10 <sup>-14</sup> |
| FLI1      | 1.270768  | 2.81x10 <sup>-33</sup> | 2.31x10 <sup>-31</sup> |
| TMEM59L   | 1.697425  | 3.48x10 <sup>-18</sup> | 3.90x10 <sup>-17</sup> |
| PTGIR     | 1.238774  | 2.06x10 <sup>-36</sup> | 3.51x10 <sup>-34</sup> |
| DSEL      | 1.348956  | 2.27x10 <sup>-30</sup> | 1.18x10 <sup>-28</sup> |
| PLSCR4    | 1.121915  | 2.22x10 <sup>-22</sup> | 3.71x10 <sup>-21</sup> |
| GPR141    | 1.486682  | 1.83x10 <sup>-22</sup> | 3.08x10 <sup>-21</sup> |
| ADAM33    | 2.129979  | 2.58x10 <sup>-26</sup> | 7.26x10 <sup>-25</sup> |
| FYB1      | 1.149965  | 2.42x10 <sup>-22</sup> | 4.01x10 <sup>-21</sup> |
| CD34      | 1.018322  | 4.27x10 <sup>-29</sup> | 1.79x10 <sup>-27</sup> |
| ARMCX1    | 1.010103  | 9.06x10 <sup>-25</sup> | 2.04x10 <sup>-23</sup> |
| NECAB1    | 1.906886  | 3.15x10 <sup>-19</sup> | 3.89x10 <sup>-18</sup> |
| SLC18A2   | 1.300328  | 8.33x10 <sup>-08</sup> | 3.68x10 <sup>-07</sup> |
| RAB31     | 1.461089  | 2.47x10 <sup>-43</sup> | 7.08x10 <sup>-40</sup> |
| CARD18    | -1.104313 | 2.09x10 <sup>-02</sup> | 3.34x10 <sup>-02</sup> |
| GABRA5    | 2.052840  | 1.11x10 <sup>-06</sup> | 4.22x10 <sup>-06</sup> |
| GPBAR1    | 1.674779  | 1.55x10 <sup>-25</sup> | 3.88x10 <sup>-24</sup> |
| LDB3      | 2.941715  | 7.92x10 <sup>-18</sup> | 8.64x10 <sup>-17</sup> |
| CD3G      | 1.113098  | 1.96x10 <sup>-15</sup> | 1.73x10 <sup>-14</sup> |
| BARX1     | 2.258327  | 5.55x10 <sup>-27</sup> | 1.69x10 <sup>-25</sup> |
| NPPC      | 1.239725  | 3.59x10 <sup>-07</sup> | 1.46x10 <sup>-06</sup> |
| SYNC      | 2.479735  | 7.02x10 <sup>-31</sup> | 3.99x10 <sup>-29</sup> |
| MYO1F     | 1.124425  | 4.01x10 <sup>-25</sup> | 9.51x10 <sup>-24</sup> |
| BMX       | 1.166533  | 1.09x10 <sup>-15</sup> | 9.88x10 <sup>-15</sup> |
| CRYBB1    | 1.139693  | 1.91x10 <sup>-23</sup> | 3.66x10 <sup>-22</sup> |
| KIAA1755  | 1.357578  | 1.03x10 <sup>-33</sup> | 9.27x10 <sup>-32</sup> |
| SIGLEC7   | 1.395112  | 1.41x10 <sup>-23</sup> | 2.77x10 <sup>-22</sup> |
| CHI3L1    | 1.075410  | 5.85x10 <sup>-07</sup> | 2.31x10 <sup>-06</sup> |
| PLA2G2E   | -1.512558 | 2.46x10 <sup>-02</sup> | 3.88x10 <sup>-02</sup> |
| C1QC      | 1.302171  | 5.58x10 <sup>-23</sup> | 1.00x10 <sup>-21</sup> |
| FGL2      | 1.896229  | 9.56x10 <sup>-30</sup> | 4.47x10 <sup>-28</sup> |
| DWORF     | -1.652085 | 2.14x10 <sup>-02</sup> | 3.41x10 <sup>-02</sup> |
| ZDHHC15   | 1.006224  | 1.00x10 <sup>-23</sup> | 2.02x10 <sup>-22</sup> |
| CPE       | 1.602213  | 9.59x10 <sup>-25</sup> | 2.16x10 <sup>-23</sup> |
| C7        | 2.841413  | 1.52x10 <sup>-23</sup> | 2.95x10 <sup>-22</sup> |
| DTX1      | 1.390534  | 1.56x10 <sup>-15</sup> | 1.39x10 <sup>-14</sup> |
| FGR       | 1.004376  | 6.15x10 <sup>-23</sup> | 1.10x10 <sup>-21</sup> |
| CXorf21   | 1.296904  | 5.36x10 <sup>-27</sup> | 1.64x10 <sup>-25</sup> |
| SERPINB11 | -5.196722 | 8.27x10 <sup>-04</sup> | 1.84x10 <sup>-03</sup> |
| CD80      | 1.041265  | 2.42x10 <sup>-13</sup> | 1.79x10 <sup>-12</sup> |
| PLCL1     | 1.166458  | 3.00x10 <sup>-27</sup> | 9.56x10 <sup>-26</sup> |
| ZBTB47    | 1.009321  | 1.68x10 <sup>-21</sup> | 2.56x10 <sup>-20</sup> |
| ABCD2     | 1.467647  | 3.42x10 <sup>-21</sup> | 5.06x10 <sup>-20</sup> |
| CFH       | 1.315563  | 8.19x10 <sup>-27</sup> | 2.44x10 <sup>-25</sup> |
| LTBP1     | 1.564057  | 3.45x10 <sup>-31</sup> | 2.03x10 <sup>-29</sup> |
| PI16      | 2.954770  | 5.01x10 <sup>-23</sup> | 9.08x10 <sup>-22</sup> |
| REEP1     | 1.081998  | 2.80x10 <sup>-07</sup> | 1.15x10 <sup>-06</sup> |
| TAC1      | 3.355896  | 2.78x10 <sup>-11</sup> | 1.74x10 <sup>-10</sup> |
| TMEM156   | 1.111835  | 1.79x10 <sup>-13</sup> | 1.34x10 <sup>-12</sup> |
| HLA-DQA1  | 1.428567  | 5.85x10 <sup>-22</sup> | 9.33x10 <sup>-21</sup> |
| PPP2R2B   | 1.068838  | 4.03x10 <sup>-22</sup> | 6.54x10 <sup>-21</sup> |
| KLK14     | -1.468877 | 2.95x10 <sup>-03</sup> | 5.78x10 <sup>-03</sup> |
| IL18BP    | 1.065995  | 1.18x10 <sup>-22</sup> | 2.03x10 <sup>-21</sup> |
| FRRS1L    | 2.773826  | 9.92x10 <sup>-17</sup> | 9.86x10 <sup>-16</sup> |
| DCSTAMP   | 1.078908  | 6.83x10 <sup>-13</sup> | 4.88x10 <sup>-12</sup> |
| CYSLTR2   | 1.413632  | 5.23x10 <sup>-23</sup> | 9.45x10 <sup>-22</sup> |
| TRIM29    | -1.029898 | 2.55x10 <sup>-02</sup> | 4.01x10 <sup>-02</sup> |
| MEF2C     | 1.424959  | 3.62x10 <sup>-36</sup> | 5.58x10 <sup>-34</sup> |
| GIMAP4    | 1.201283  | 1.66x10 <sup>-31</sup> | 1.04x10 <sup>-29</sup> |

Table SII. Continued.

| Gene      | logFC     | P-value                | FDR                    |
|-----------|-----------|------------------------|------------------------|
| GZMM      | 1.167806  | 1.28x10 <sup>-15</sup> | 1.15x10 <sup>-14</sup> |
| EVL       | 1.052585  | 1.45x10 <sup>-25</sup> | 3.64x10 <sup>-24</sup> |
| DOCK8     | 1.028555  | 5.90x10 <sup>-18</sup> | 6.49x10 <sup>-17</sup> |
| MRC1      | 1.386236  | 5.86x10 <sup>-21</sup> | 8.48x10 <sup>-20</sup> |
| FCAR      | 1.017220  | 5.93x10 <sup>-08</sup> | 2.67x10 <sup>-07</sup> |
| EFEMP1    | 2.074274  | 7.47x10 <sup>-35</sup> | 8.55x10 <sup>-33</sup> |
| CFD       | 1.338421  | 1.02x10 <sup>-12</sup> | 7.21x10 <sup>-12</sup> |
| SYT11     | 1.293738  | 2.86x10 <sup>-34</sup> | 2.91x10 <sup>-32</sup> |
| FGF14     | 1.269084  | 1.54x10 <sup>-26</sup> | 4.45x10 <sup>-25</sup> |
| PLP1      | 2.747611  | 4.72x10 <sup>-26</sup> | 1.26x10 <sup>-24</sup> |
| HLA-DOB   | 1.024852  | 3.61x10 <sup>-10</sup> | 2.05x10 <sup>-09</sup> |
| TLR8      | 1.585790  | 1.26x10 <sup>-19</sup> | 1.60x10 <sup>-18</sup> |
| FCGR3A    | 1.341681  | 8.62x10 <sup>-20</sup> | 1.12x10 <sup>-18</sup> |
| NCKAP1L   | 1.403235  | 2.71x10 <sup>-26</sup> | 7.56x10 <sup>-25</sup> |
| C3        | 1.267598  | 1.40x10 <sup>-20</sup> | 1.95x10 <sup>-19</sup> |
| SLAMF1    | 1.111299  | 8.98x10 <sup>-20</sup> | 1.16x10 <sup>-18</sup> |
| SLC7A2    | 1.162722  | 2.36x10 <sup>-04</sup> | 5.91x10 <sup>-04</sup> |
| CERCAM    | 1.112152  | 2.12x10 <sup>-24</sup> | 4.56x10 <sup>-23</sup> |
| LGALS7    | -3.417302 | 1.58x10 <sup>-03</sup> | 3.30x10 <sup>-03</sup> |
| ATP6V1G2  | 1.114180  | 4.02x10 <sup>-16</sup> | 3.79x10 <sup>-15</sup> |
| ZNF385D   | 1.738279  | 1.56x10 <sup>-26</sup> | 4.49x10 <sup>-25</sup> |
| ZFPM2     | 1.532478  | 5.96x10 <sup>-27</sup> | 1.80x10 <sup>-25</sup> |
| CD22      | 1.492351  | 2.05x10 <sup>-17</sup> | 2.15x10 <sup>-16</sup> |
| SFMBT2    | 1.193471  | 5.11x10 <sup>-27</sup> | 1.57x10 <sup>-25</sup> |
| IGFBP6    | 1.293187  | 1.70x10 <sup>-22</sup> | 2.87x10 <sup>-21</sup> |
| GLT8D2    | 1.656058  | 8.38x10 <sup>-43</sup> | 1.33x10 <sup>-39</sup> |
| BHMT2     | 2.101672  | 7.97x10 <sup>-28</sup> | 2.75x10 <sup>-26</sup> |
| NLRC3     | 1.088906  | 4.81x10 <sup>-16</sup> | 4.48x10 <sup>-15</sup> |
| ANKRD55   | 1.324393  | 1.01x10 <sup>-16</sup> | 1.00x10 <sup>-15</sup> |
| CLEC6A    | 1.052990  | 4.46x10 <sup>-07</sup> | 1.79x10 <sup>-06</sup> |
| HIC1      | 1.447729  | 1.16x10 <sup>-32</sup> | 8.69x10 <sup>-31</sup> |
| CXorf36   | 1.129062  | 1.38x10 <sup>-28</sup> | 5.38x10 <sup>-27</sup> |
| POPDC2    | 2.339886  | 4.32x10 <sup>-29</sup> | 1.81x10 <sup>-27</sup> |
| PLD4      | 1.514784  | 1.28x10 <sup>-20</sup> | 1.80x10 <sup>-19</sup> |
| FAM181B   | 1.061706  | 2.45x10 <sup>-11</sup> | 1.55x10 <sup>-10</sup> |
| PCSK1     | 1.473396  | 2.00x10 <sup>-09</sup> | 1.06x10 <sup>-08</sup> |
| CRISPLD2  | 1.496819  | 7.39x10 <sup>-37</sup> | 1.39x10 <sup>-34</sup> |
| TNFAIP8L3 | 1.317477  | 4.18x10 <sup>-20</sup> | 5.55x10 <sup>-19</sup> |
| MKX       | 1.616670  | 1.81x10 <sup>-19</sup> | 2.26x10 <sup>-18</sup> |
| COL19A1   | 2.078315  | 4.09x10 <sup>-16</sup> | 3.85x10 <sup>-15</sup> |
| CEBPE     | 1.500354  | 9.95x10 <sup>-18</sup> | 1.07x10 <sup>-16</sup> |
| HAMP      | 1.270014  | 7.59x10 <sup>-15</sup> | 6.40x10 <sup>-14</sup> |
| IGFALS    | -1.853382 | 1.61x10 <sup>-02</sup> | 2.65x10 <sup>-02</sup> |
| GJA5      | 1.088190  | 1.09x10 <sup>-26</sup> | 3.19x10 <sup>-25</sup> |
| MOXD1     | 1.205702  | 9.53x10 <sup>-33</sup> | 7.18x10 <sup>-31</sup> |
| KLHL41    | 1.520315  | 2.41x10 <sup>-09</sup> | 1.27x10 <sup>-08</sup> |
| MRVI1     | 2.069476  | 2.37x10 <sup>-34</sup> | 2.48x10 <sup>-32</sup> |
| PNMA8B    | 1.060664  | 1.84x10 <sup>-25</sup> | 4.56x10 <sup>-24</sup> |
| CMA1      | 2.349781  | 9.65x10 <sup>-19</sup> | 1.13x10 <sup>-17</sup> |
| HS3ST6    | -3.245575 | 3.05x10 <sup>-02</sup> | 4.68x10 <sup>-02</sup> |
| FOXN1     | -1.868659 | 1.37x10 <sup>-04</sup> | 3.59x10 <sup>-04</sup> |
| MEIS1     | 1.087810  | 2.50x10 <sup>-17</sup> | 2.61x10 <sup>-16</sup> |
| LRRTM1    | 1.158726  | 4.60x10 <sup>-12</sup> | 3.10x10 <sup>-11</sup> |
| LDLRAD4   | 1.019820  | 4.03x10 <sup>-19</sup> | 4.91x10 <sup>-18</sup> |
| KCNJ8     | 1.132254  | 4.71x10 <sup>-36</sup> | 7.01x10 <sup>-34</sup> |
| ALOX5AP   | 1.337037  | 1.86x10 <sup>-24</sup> | 4.04x10 <sup>-23</sup> |
| DPYSL3    | 2.009739  | 2.37x10 <sup>-34</sup> | 2.48x10 <sup>-32</sup> |
| PLPP7     | 1.471835  | 2.31x10 <sup>-33</sup> | 1.93x10 <sup>-31</sup> |
| FAM129C   | 1.427680  | 9.02x10 <sup>-11</sup> | 5.40x10 <sup>-10</sup> |



Table SII. Continued.

| Gene      | logFC     | P-value                | FDR                    |
|-----------|-----------|------------------------|------------------------|
| CPED1     | 2.183643  | 4.47x10 <sup>-30</sup> | 2.21x10 <sup>-28</sup> |
| CYTL1     | 1.292225  | 3.45x10 <sup>-18</sup> | 3.86x10 <sup>-17</sup> |
| AFF3      | 1.464460  | 1.48x10 <sup>-14</sup> | 1.21x10 <sup>-13</sup> |
| CNKSR2    | 2.578031  | 1.42x10 <sup>-23</sup> | 2.79x10 <sup>-22</sup> |
| SH3RF3    | 1.079751  | 5.69x10 <sup>-26</sup> | 1.51x10 <sup>-24</sup> |
| CD52      | 1.333858  | 2.44x10 <sup>-20</sup> | 3.31x10 <sup>-19</sup> |
| HTR7      | 1.359304  | 3.91x10 <sup>-21</sup> | 5.75x10 <sup>-20</sup> |
| SEPT4     | 1.137242  | 1.62x10 <sup>-33</sup> | 1.40x10 <sup>-31</sup> |
| RASGRP4   | 1.144727  | 7.87x10 <sup>-26</sup> | 2.05x10 <sup>-24</sup> |
| DPT       | 2.355768  | 1.29x10 <sup>-29</sup> | 5.93x10 <sup>-28</sup> |
| BMP8A     | 1.034540  | 1.46x10 <sup>-16</sup> | 1.42x10 <sup>-15</sup> |
| GYPE      | 1.163861  | 2.53x10 <sup>-15</sup> | 2.21x10 <sup>-14</sup> |
| C1orf162  | 1.317634  | 7.45x10 <sup>-30</sup> | 3.56x10 <sup>-28</sup> |
| MYOZ3     | 1.001983  | 1.45x10 <sup>-10</sup> | 8.53x10 <sup>-10</sup> |
| GRIN2A    | 1.024574  | 4.78x10 <sup>-10</sup> | 2.70x10 <sup>-09</sup> |
| MYL9      | 2.492698  | 5.50x10 <sup>-32</sup> | 3.70x10 <sup>-30</sup> |
| TNFRSF13C | 1.377207  | 5.11x10 <sup>-06</sup> | 1.75x10 <sup>-05</sup> |
| SRPX      | 2.008852  | 3.94x10 <sup>-27</sup> | 1.23x10 <sup>-25</sup> |
| FHL5      | 1.379267  | 1.46x10 <sup>-22</sup> | 2.50x10 <sup>-21</sup> |
| FAM107A   | 1.608264  | 9.28x10 <sup>-23</sup> | 1.62x10 <sup>-21</sup> |
| GLI3      | 1.896172  | 7.83x10 <sup>-40</sup> | 4.00x10 <sup>-37</sup> |
| ELF5      | -1.012996 | 1.25x10 <sup>-02</sup> | 2.11x10 <sup>-02</sup> |
| RIC3      | 1.073652  | 1.18x10 <sup>-13</sup> | 8.89x10 <sup>-13</sup> |
| ISM1      | 2.147814  | 6.16x10 <sup>-29</sup> | 2.54x10 <sup>-27</sup> |
| ITGA1     | 1.210903  | 4.36x10 <sup>-26</sup> | 1.17x10 <sup>-24</sup> |
| MUC5AC    | -1.828147 | 1.63x10 <sup>-02</sup> | 2.67x10 <sup>-02</sup> |
| LAPTM5    | 1.357353  | 2.33x10 <sup>-26</sup> | 6.59x10 <sup>-25</sup> |
| CD86      | 1.293336  | 2.98x10 <sup>-25</sup> | 7.25x10 <sup>-24</sup> |
| DOK2      | 1.125727  | 1.31x10 <sup>-22</sup> | 2.25x10 <sup>-21</sup> |
| CD69      | 1.308394  | 5.79x10 <sup>-22</sup> | 9.26x10 <sup>-21</sup> |
| MFAP4     | 2.133299  | 1.08x10 <sup>-31</sup> | 6.93x10 <sup>-30</sup> |
| SCARA5    | 1.442484  | 2.20x10 <sup>-10</sup> | 1.27x10 <sup>-09</sup> |
| FBN1      | 1.890723  | 1.91x10 <sup>-41</sup> | 1.24x10 <sup>-38</sup> |
| PRKCB     | 1.718140  | 3.11x10 <sup>-26</sup> | 8.63x10 <sup>-25</sup> |
| SLAMF8    | 1.280885  | 5.64x10 <sup>-23</sup> | 1.01x10 <sup>-21</sup> |
| TUBA1A    | 1.435250  | 1.06x10 <sup>-35</sup> | 1.48x10 <sup>-33</sup> |
| MADCAM1   | 1.197055  | 4.15x10 <sup>-04</sup> | 9.86x10 <sup>-04</sup> |
| TNN       | 2.363399  | 2.01x10 <sup>-20</sup> | 2.75x10 <sup>-19</sup> |
| AKT3      | 1.465881  | 2.83x10 <sup>-34</sup> | 2.89x10 <sup>-32</sup> |
| IL17B     | 1.066198  | 1.59x10 <sup>-17</sup> | 1.69x10 <sup>-16</sup> |
| VCX       | -2.454758 | 1.06x10 <sup>-02</sup> | 1.83x10 <sup>-02</sup> |
| TMPRSS11E | -3.227057 | 2.92x10 <sup>-02</sup> | 4.50x10 <sup>-02</sup> |
| PLIN1     | 1.901993  | 1.06x10 <sup>-02</sup> | 1.82x10 <sup>-02</sup> |
| MAP1LC3C  | 1.140006  | 7.23x10 <sup>-13</sup> | 5.16x10 <sup>-12</sup> |
| CAVIN1    | 1.494746  | 2.93x10 <sup>-33</sup> | 2.39x10 <sup>-31</sup> |
| CDC42EP3  | 1.130972  | 3.89x10 <sup>-20</sup> | 5.19x10 <sup>-19</sup> |
| PRSS2     | -1.848949 | 6.51x10 <sup>-03</sup> | 1.18x10 <sup>-02</sup> |
| FCRL4     | 1.155701  | 1.90x10 <sup>-08</sup> | 9.09x10 <sup>-08</sup> |
| PRKAR2B   | 1.427576  | 1.81x10 <sup>-21</sup> | 2.74x10 <sup>-20</sup> |
| LILRB4    | 1.347458  | 1.07x10 <sup>-23</sup> | 2.14x10 <sup>-22</sup> |
| STAP1     | 1.370023  | 1.16x10 <sup>-15</sup> | 1.05x10 <sup>-14</sup> |
| C1R       | 1.617882  | 4.79x10 <sup>-46</sup> | 3.43x10 <sup>-42</sup> |
| WISP2     | 1.911671  | 5.51x10 <sup>-17</sup> | 5.58x10 <sup>-16</sup> |
| TSPAN2    | 1.621347  | 8.76x10 <sup>-25</sup> | 1.98x10 <sup>-23</sup> |
| CD19      | 1.346917  | 1.22x10 <sup>-09</sup> | 6.63x10 <sup>-09</sup> |
| REEP2     | 1.219217  | 4.36x10 <sup>-16</sup> | 4.08x10 <sup>-15</sup> |
| ECSCR     | 1.021182  | 3.67x10 <sup>-27</sup> | 1.16x10 <sup>-25</sup> |
| EBF3      | 1.268724  | 3.92x10 <sup>-28</sup> | 1.43x10 <sup>-26</sup> |
| PARVG     | 1.128499  | 3.53x10 <sup>-25</sup> | 8.49x10 <sup>-24</sup> |

Table SII. Continued.

| Gene     | logFC     | P-value                | FDR                    |
|----------|-----------|------------------------|------------------------|
| CH25H    | 1.293840  | 2.66x10 <sup>-22</sup> | 4.38x10 <sup>-21</sup> |
| ZNF135   | 1.468222  | 1.89x10 <sup>-29</sup> | 8.38x10 <sup>-28</sup> |
| ADAMTS8  | 2.504390  | 1.29x10 <sup>-20</sup> | 1.81x10 <sup>-19</sup> |
| WNT2     | 1.254787  | 4.02x10 <sup>-13</sup> | 2.93x10 <sup>-12</sup> |
| PODN     | 2.203197  | 4.48x10 <sup>-37</sup> | 9.28x10 <sup>-35</sup> |
| RBM24    | 1.568116  | 2.07x10 <sup>-17</sup> | 2.17x10 <sup>-16</sup> |
| GALNT17  | 1.033357  | 1.24x10 <sup>-17</sup> | 1.32x10 <sup>-16</sup> |
| AQP12B   | -2.556999 | 6.75x10 <sup>-03</sup> | 1.22x10 <sup>-02</sup> |
| COL14A1  | 2.647041  | 3.82x10 <sup>-39</sup> | 1.52x10 <sup>-36</sup> |
| IL2RA    | 1.145927  | 3.04x10 <sup>-17</sup> | 3.14x10 <sup>-16</sup> |
| NLGN4Y   | 1.225058  | 4.84x10 <sup>-05</sup> | 1.39x10 <sup>-04</sup> |
| FAM49A   | 1.460741  | 1.77x10 <sup>-34</sup> | 1.89x10 <sup>-32</sup> |
| RASSF8   | 1.295284  | 1.11x10 <sup>-24</sup> | 2.48x10 <sup>-23</sup> |
| CXCL10   | 1.439645  | 1.66x10 <sup>-08</sup> | 8.02x10 <sup>-08</sup> |
| CST2     | 1.217390  | 2.79x10 <sup>-19</sup> | 3.46x10 <sup>-18</sup> |
| KCNA5    | 2.289321  | 1.37x10 <sup>-25</sup> | 3.45x10 <sup>-24</sup> |
| VGLL3    | 1.974793  | 5.55x10 <sup>-36</sup> | 8.19x10 <sup>-34</sup> |
| S100A2   | -1.753335 | 1.75x10 <sup>-03</sup> | 3.62x10 <sup>-03</sup> |
| PCBP3    | 1.045211  | 1.04x10 <sup>-20</sup> | 1.47x10 <sup>-19</sup> |
| PDZRN3   | 1.110842  | 1.63x10 <sup>-15</sup> | 1.45x10 <sup>-14</sup> |
| TH       | -1.114828 | 1.87x10 <sup>-03</sup> | 3.84x10 <sup>-03</sup> |
| TIGIT    | 1.030645  | 6.23x10 <sup>-15</sup> | 5.28x10 <sup>-14</sup> |
| CD36     | 1.424868  | 9.12x10 <sup>-22</sup> | 1.42x10 <sup>-20</sup> |
| NHSL2    | 2.151371  | 1.05x10 <sup>-34</sup> | 1.16x10 <sup>-32</sup> |
| POU6F1   | 1.072338  | 1.25x10 <sup>-23</sup> | 2.48x10 <sup>-22</sup> |
| ADA2     | 1.235983  | 8.02x10 <sup>-24</sup> | 1.63x10 <sup>-22</sup> |
| ADH1B    | 2.643526  | 2.17x10 <sup>-19</sup> | 2.71x10 <sup>-18</sup> |
| ARHGAP9  | 1.131488  | 8.76x10 <sup>-21</sup> | 1.25x10 <sup>-19</sup> |
| TIMD4    | 1.415867  | 1.89x10 <sup>-13</sup> | 1.41x10 <sup>-12</sup> |
| NLGN1    | 1.300093  | 9.02x10 <sup>-15</sup> | 7.54x10 <sup>-14</sup> |
| ZBTB16   | 1.887269  | 5.36x10 <sup>-18</sup> | 5.92x10 <sup>-17</sup> |
| BCL2A1   | 1.008804  | 2.21x10 <sup>-12</sup> | 1.52x10 <sup>-11</sup> |
| SAMD3    | 1.140252  | 1.61x10 <sup>-18</sup> | 1.86x10 <sup>-17</sup> |
| GIMAP7   | 1.283027  | 1.93x10 <sup>-27</sup> | 6.29x10 <sup>-26</sup> |
| DYNAP    | -3.149262 | 1.77x10 <sup>-02</sup> | 2.88x10 <sup>-02</sup> |
| TSPAN4   | 1.007582  | 7.00x10 <sup>-30</sup> | 3.35x10 <sup>-28</sup> |
| CAVIN2   | 1.267032  | 2.69x10 <sup>-21</sup> | 4.01x10 <sup>-20</sup> |
| F2R      | 1.166581  | 1.35x10 <sup>-29</sup> | 6.15x10 <sup>-28</sup> |
| CCL2     | 1.264947  | 2.26x10 <sup>-25</sup> | 5.55x10 <sup>-24</sup> |
| TM4SF4   | -1.090379 | 1.18x10 <sup>-02</sup> | 2.00x10 <sup>-02</sup> |
| FSTL1    | 1.546444  | 7.78x10 <sup>-43</sup> | 1.33x10 <sup>-39</sup> |
| TYROBP   | 1.295605  | 2.61x10 <sup>-26</sup> | 7.33x10 <sup>-25</sup> |
| MSR1     | 1.429623  | 1.17x10 <sup>-26</sup> | 3.41x10 <sup>-25</sup> |
| GPM6A    | 2.014383  | 1.05x10 <sup>-17</sup> | 1.13x10 <sup>-16</sup> |
| ANGPTL1  | 3.204576  | 4.45x10 <sup>-31</sup> | 2.59x10 <sup>-29</sup> |
| PCDH10   | 3.159226  | 2.62x10 <sup>-23</sup> | 4.92x10 <sup>-22</sup> |
| SHISAL2A | 1.496403  | 1.90x10 <sup>-18</sup> | 2.18x10 <sup>-17</sup> |
| FBLN1    | 1.773847  | 3.15x10 <sup>-26</sup> | 8.71x10 <sup>-25</sup> |
| WAS      | 1.350884  | 4.15x10 <sup>-25</sup> | 9.81x10 <sup>-24</sup> |
| SYPL2    | 1.072585  | 5.11x10 <sup>-17</sup> | 5.20x10 <sup>-16</sup> |
| SDS      | 1.036028  | 1.61x10 <sup>-14</sup> | 1.31x10 <sup>-13</sup> |
| PPP1R16B | 1.246372  | 2.46x10 <sup>-19</sup> | 3.06x10 <sup>-18</sup> |
| PIK3R5   | 1.263724  | 1.62x10 <sup>-25</sup> | 4.06x10 <sup>-24</sup> |
| DLX3     | -1.991699 | 4.42x10 <sup>-04</sup> | 1.04x10 <sup>-03</sup> |
| KLRG2    | -1.446892 | 8.24x10 <sup>-04</sup> | 1.83x10 <sup>-03</sup> |
| TSHZ3    | 1.210190  | 1.07x10 <sup>-42</sup> | 1.39x10 <sup>-39</sup> |
| RARRES2  | 1.115305  | 2.25x10 <sup>-29</sup> | 9.78x10 <sup>-28</sup> |
| CD248    | 1.141432  | 1.72x10 <sup>-24</sup> | 3.77x10 <sup>-23</sup> |
| ABCC9    | 2.345205  | 2.33x10 <sup>-36</sup> | 3.84x10 <sup>-34</sup> |

Table SII. Continued.

| Gene       | logFC     | P-value                | FDR                    |
|------------|-----------|------------------------|------------------------|
| P2RY13     | 1.341507  | 2.27x10 <sup>-20</sup> | 3.10x10 <sup>-19</sup> |
| CASS4      | 1.168616  | 2.22x10 <sup>-22</sup> | 3.71x10 <sup>-21</sup> |
| IL7R       | 1.394573  | 2.09x10 <sup>-20</sup> | 2.86x10 <sup>-19</sup> |
| BMP3       | 1.739340  | 3.80x10 <sup>-09</sup> | 1.97x10 <sup>-08</sup> |
| NALCN      | 1.146017  | 1.79x10 <sup>-23</sup> | 3.44x10 <sup>-22</sup> |
| ITIH3      | 1.640523  | 1.66x10 <sup>-22</sup> | 2.83x10 <sup>-21</sup> |
| MAGEA11    | -1.196746 | 1.92x10 <sup>-03</sup> | 3.93x10 <sup>-03</sup> |
| CERS3      | -2.770832 | 7.88x10 <sup>-03</sup> | 1.40x10 <sup>-02</sup> |
| BBOX1      | -1.143940 | 3.48x10 <sup>-03</sup> | 6.71x10 <sup>-03</sup> |
| CAMK4      | 1.231888  | 5.65x10 <sup>-20</sup> | 7.46x10 <sup>-19</sup> |
| LILRA1     | 1.438063  | 1.22x10 <sup>-26</sup> | 3.57x10 <sup>-25</sup> |
| MYBPH      | 3.743286  | 5.50x10 <sup>-06</sup> | 1.87x10 <sup>-05</sup> |
| ATP8B4     | 1.201169  | 1.29x10 <sup>-25</sup> | 3.28x10 <sup>-24</sup> |
| CSAG3      | -1.277077 | 2.08x10 <sup>-02</sup> | 3.33x10 <sup>-02</sup> |
| IL16       | 1.368911  | 5.96x10 <sup>-26</sup> | 1.57x10 <sup>-24</sup> |
| VPREB3     | 2.119342  | 3.29x10 <sup>-11</sup> | 2.05x10 <sup>-10</sup> |
| BMP7       | -1.270197 | 7.43x10 <sup>-06</sup> | 2.48x10 <sup>-05</sup> |
| GPR17      | 1.374636  | 6.68x10 <sup>-12</sup> | 4.44x10 <sup>-11</sup> |
| ASB5       | 3.542708  | 3.68x10 <sup>-15</sup> | 3.17x10 <sup>-14</sup> |
| CLEC14A    | 1.032744  | 2.55x10 <sup>-26</sup> | 7.19x10 <sup>-25</sup> |
| ITGA7      | 1.684082  | 5.93x10 <sup>-17</sup> | 6.00x10 <sup>-16</sup> |
| LPAR4      | 1.306992  | 1.65x10 <sup>-24</sup> | 3.62x10 <sup>-23</sup> |
| ITLN2      | -1.722284 | 2.77x10 <sup>-02</sup> | 4.30x10 <sup>-02</sup> |
| MAB21L3    | -1.681211 | 2.16x10 <sup>-02</sup> | 3.45x10 <sup>-02</sup> |
| MARCO      | 1.374865  | 5.27x10 <sup>-07</sup> | 2.09x10 <sup>-06</sup> |
| SCHIP1     | 1.298376  | 1.86x10 <sup>-18</sup> | 2.14x10 <sup>-17</sup> |
| LYVE1      | 1.698176  | 3.91x10 <sup>-21</sup> | 5.75x10 <sup>-20</sup> |
| SRPX2      | 1.122099  | 4.10x10 <sup>-25</sup> | 9.71x10 <sup>-24</sup> |
| TLR1       | 1.265952  | 5.06x10 <sup>-23</sup> | 9.16x10 <sup>-22</sup> |
| TGFB1I1    | 1.587276  | 3.96x10 <sup>-31</sup> | 2.32x10 <sup>-29</sup> |
| RERG       | 1.857838  | 6.09x10 <sup>-23</sup> | 1.09x10 <sup>-21</sup> |
| ANKS1B     | 1.338916  | 3.52x10 <sup>-11</sup> | 2.18x10 <sup>-10</sup> |
| ANXA6      | 1.254169  | 5.16x10 <sup>-32</sup> | 3.50x10 <sup>-30</sup> |
| AL645941.2 | 1.162323  | 1.66x10 <sup>-09</sup> | 8.90x10 <sup>-09</sup> |
| GUCY1B1    | 1.650476  | 3.30x10 <sup>-43</sup> | 7.86x10 <sup>-40</sup> |
| TMPRSS11F  | -2.437639 | 1.84x10 <sup>-03</sup> | 3.78x10 <sup>-03</sup> |
| KLHL6      | 1.274897  | 6.10x10 <sup>-22</sup> | 9.72x10 <sup>-21</sup> |
| GZMK       | 1.803858  | 1.94x10 <sup>-21</sup> | 2.95x10 <sup>-20</sup> |
| TMEM213    | -2.003639 | 6.12x10 <sup>-03</sup> | 1.12x10 <sup>-02</sup> |
| CCR8       | 1.343190  | 6.61x10 <sup>-19</sup> | 7.92x10 <sup>-18</sup> |
| NPTX1      | 1.047343  | 6.55x10 <sup>-14</sup> | 5.04x10 <sup>-13</sup> |
| NPAS4      | 1.739868  | 5.57x10 <sup>-13</sup> | 4.02x10 <sup>-12</sup> |
| SPARC      | 1.406784  | 5.09x10 <sup>-34</sup> | 4.85x10 <sup>-32</sup> |
| GPR142     | 1.323858  | 3.04x10 <sup>-06</sup> | 1.08x10 <sup>-05</sup> |
| CAND2      | 1.286597  | 5.57x10 <sup>-15</sup> | 4.74x10 <sup>-14</sup> |
| FILIP1L    | 1.479419  | 2.82x10 <sup>-35</sup> | 3.67x10 <sup>-33</sup> |
| OR51E2     | 1.043282  | 1.04x10 <sup>-11</sup> | 6.77x10 <sup>-11</sup> |
| RSPO2      | 1.871029  | 9.89x10 <sup>-18</sup> | 1.07x10 <sup>-16</sup> |
| BCL6B      | 1.020535  | 4.43x10 <sup>-27</sup> | 1.38x10 <sup>-25</sup> |
| ADCY2      | 1.127983  | 6.02x10 <sup>-23</sup> | 1.08x10 <sup>-21</sup> |
| CPXM2      | 2.471286  | 3.06x10 <sup>-35</sup> | 3.91x10 <sup>-33</sup> |
| TWIST2     | 1.874971  | 1.43x10 <sup>-33</sup> | 1.26x10 <sup>-31</sup> |
| CLEC9A     | 1.316200  | 9.84x10 <sup>-18</sup> | 1.06x10 <sup>-16</sup> |
| TREM1      | 1.027282  | 6.66x10 <sup>-07</sup> | 2.61x10 <sup>-06</sup> |
| SHISA3     | 2.611626  | 1.88x10 <sup>-24</sup> | 4.08x10 <sup>-23</sup> |
| ASCL5      | -1.273980 | 6.06x10 <sup>-04</sup> | 1.39x10 <sup>-03</sup> |
| FNBP1      | 1.374727  | 2.46x10 <sup>-23</sup> | 4.65x10 <sup>-22</sup> |
| TNS2       | 1.155708  | 3.53x10 <sup>-23</sup> | 6.55x10 <sup>-22</sup> |
| HTRA3      | 1.401949  | 1.53x10 <sup>-29</sup> | 6.85x10 <sup>-28</sup> |

Table SII. Continued.

| Gene     | logFC     | P-value                | FDR                    |
|----------|-----------|------------------------|------------------------|
| DHH      | 1.516379  | 3.12x10 <sup>-25</sup> | 7.56x10 <sup>-24</sup> |
| SNAP91   | 1.533689  | 9.44x10 <sup>-12</sup> | 6.16x10 <sup>-11</sup> |
| HCLS1    | 1.231454  | 2.46x10 <sup>-26</sup> | 6.96x10 <sup>-25</sup> |
| GLI2     | 1.182133  | 2.26x10 <sup>-23</sup> | 4.27x10 <sup>-22</sup> |
| RNF150   | 2.348455  | 2.74x10 <sup>-30</sup> | 1.41x10 <sup>-28</sup> |
| MGARP    | 1.326281  | 2.04x10 <sup>-11</sup> | 1.30x10 <sup>-10</sup> |
| DUSP26   | 1.118070  | 1.39x10 <sup>-17</sup> | 1.48x10 <sup>-16</sup> |
| NNMT     | 1.351347  | 1.92x10 <sup>-33</sup> | 1.61x10 <sup>-31</sup> |
| HGF      | 1.405670  | 1.54x10 <sup>-22</sup> | 2.63x10 <sup>-21</sup> |
| CORO1A   | 1.247851  | 1.49x10 <sup>-19</sup> | 1.88x10 <sup>-18</sup> |
| MN1      | 1.234890  | 1.30x10 <sup>-21</sup> | 2.01x10 <sup>-20</sup> |
| TMEM200B | 1.027177  | 5.32x10 <sup>-25</sup> | 1.24x10 <sup>-23</sup> |
| CAP2     | 1.471668  | 8.06x10 <sup>-15</sup> | 6.79x10 <sup>-14</sup> |
| SLITRK4  | 1.048260  | 2.37x10 <sup>-18</sup> | 2.69x10 <sup>-17</sup> |
| AQP9     | 1.198221  | 4.06x10 <sup>-06</sup> | 1.41x10 <sup>-05</sup> |
| CD72     | 1.051358  | 2.13x10 <sup>-18</sup> | 2.43x10 <sup>-17</sup> |
| GPR171   | 1.112869  | 1.53x10 <sup>-15</sup> | 1.37x10 <sup>-14</sup> |
| FGFBP1   | -1.380626 | 5.99x10 <sup>-05</sup> | 1.68x10 <sup>-04</sup> |
| AQP12A   | -3.369983 | 2.38x10 <sup>-02</sup> | 3.76x10 <sup>-02</sup> |
| TAGAP    | 1.333091  | 2.23x10 <sup>-23</sup> | 4.23x10 <sup>-22</sup> |
| SCN1B    | 1.077685  | 8.33x10 <sup>-26</sup> | 2.16x10 <sup>-24</sup> |
| MTNR1A   | -1.269631 | 3.90x10 <sup>-06</sup> | 1.36x10 <sup>-05</sup> |
| CRCT1    | -3.929140 | 4.51x10 <sup>-04</sup> | 1.06x10 <sup>-03</sup> |
| APOBEC3H | 1.158623  | 2.69x10 <sup>-17</sup> | 2.80x10 <sup>-16</sup> |
| SIRPB2   | 1.406913  | 1.02x10 <sup>-27</sup> | 3.46x10 <sup>-26</sup> |
| CNTN4    | 1.439564  | 1.48x10 <sup>-22</sup> | 2.52x10 <sup>-21</sup> |
| CCDC80   | 2.627040  | 2.64x10 <sup>-41</sup> | 1.65x10 <sup>-38</sup> |
| DGKI     | 1.662496  | 2.25x10 <sup>-27</sup> | 7.30x10 <sup>-26</sup> |
| CD40LG   | 1.196764  | 1.07x10 <sup>-16</sup> | 1.05x10 <sup>-15</sup> |
| P2RY8    | 1.773133  | 5.64x10 <sup>-23</sup> | 1.01x10 <sup>-21</sup> |
| MS4A6A   | 1.458033  | 2.45x10 <sup>-29</sup> | 1.06x10 <sup>-27</sup> |
| LAIR1    | 1.335547  | 1.35x10 <sup>-29</sup> | 6.15x10 <sup>-28</sup> |
| UGT1A8   | -1.030006 | 2.67x10 <sup>-02</sup> | 4.18x10 <sup>-02</sup> |
| GPR84    | 1.134835  | 1.70x10 <sup>-13</sup> | 1.27x10 <sup>-12</sup> |
| AOAH     | 1.415181  | 9.12x10 <sup>-22</sup> | 1.42x10 <sup>-20</sup> |
| NFAM1    | 1.051423  | 3.51x10 <sup>-20</sup> | 4.71x10 <sup>-19</sup> |
| LTA      | 1.222680  | 2.23x10 <sup>-17</sup> | 2.34x10 <sup>-16</sup> |
| PNCK     | 1.890347  | 1.82x10 <sup>-06</sup> | 6.69x10 <sup>-06</sup> |
| BPIFB2   | -4.622922 | 2.20x10 <sup>-02</sup> | 3.50x10 <sup>-02</sup> |
| SELPLG   | 1.070609  | 1.10x10 <sup>-21</sup> | 1.71x10 <sup>-20</sup> |
| MMP19    | 1.277906  | 9.13x10 <sup>-34</sup> | 8.33x10 <sup>-32</sup> |
| TMEM255A | 1.579490  | 1.97x10 <sup>-25</sup> | 4.87x10 <sup>-24</sup> |
| CORO2B   | 1.402994  | 2.22x10 <sup>-20</sup> | 3.04x10 <sup>-19</sup> |
| FCGR2A   | 1.197277  | 2.64x10 <sup>-26</sup> | 7.40x10 <sup>-25</sup> |
| SEZ6L    | 1.104522  | 9.26x10 <sup>-17</sup> | 9.23x10 <sup>-16</sup> |
| PLAC9    | 1.073264  | 1.32x10 <sup>-16</sup> | 1.29x10 <sup>-15</sup> |
| LILRA2   | 1.419970  | 6.70x10 <sup>-21</sup> | 9.64x10 <sup>-20</sup> |
| CPA3     | 1.453829  | 1.58x10 <sup>-16</sup> | 1.54x10 <sup>-15</sup> |
| SLC2A5   | 1.003801  | 6.61x10 <sup>-18</sup> | 7.25x10 <sup>-17</sup> |
| NPY1R    | 1.592831  | 6.34x10 <sup>-08</sup> | 2.84x10 <sup>-07</sup> |
| PMP22    | 1.102828  | 3.85x10 <sup>-35</sup> | 4.79x10 <sup>-33</sup> |
| C8orf48  | 1.268745  | 1.21x10 <sup>-31</sup> | 7.68x10 <sup>-30</sup> |
| INSYN1   | 1.262264  | 3.81x10 <sup>-23</sup> | 7.05x10 <sup>-22</sup> |
| TNFSF4   | 1.240108  | 4.03x10 <sup>-24</sup> | 8.44x10 <sup>-23</sup> |
| FAM19A5  | 1.143974  | 9.61x10 <sup>-21</sup> | 1.36x10 <sup>-19</sup> |
| PDE5A    | 1.038721  | 2.34x10 <sup>-16</sup> | 2.24x10 <sup>-15</sup> |
| MMP23B   | 1.339098  | 1.80x10 <sup>-20</sup> | 2.47x10 <sup>-19</sup> |
| HAVCR2   | 1.236279  | 1.14x10 <sup>-23</sup> | 2.28x10 <sup>-22</sup> |
| FGF10    | 2.668021  | 3.04x10 <sup>-26</sup> | 8.46x10 <sup>-25</sup> |

Table SII. Continued.

| Gene     | logFC     | P-value                | FDR                    |
|----------|-----------|------------------------|------------------------|
| RGS13    | 2.180419  | 9.48x10 <sup>-11</sup> | 5.66x10 <sup>-10</sup> |
| SCN4B    | 1.751699  | 9.34x10 <sup>-20</sup> | 1.21x10 <sup>-18</sup> |
| ARMH4    | 1.027168  | 1.79x10 <sup>-23</sup> | 3.44x10 <sup>-22</sup> |
| FAM124B  | 1.404043  | 7.58x10 <sup>-31</sup> | 4.27x10 <sup>-29</sup> |
| EFNA3    | -1.027187 | 1.24x10 <sup>-09</sup> | 6.70x10 <sup>-09</sup> |
| GSDMB    | -1.026628 | 6.55x10 <sup>-03</sup> | 1.19x10 <sup>-02</sup> |
| PDE1C    | 1.087839  | 5.87x10 <sup>-10</sup> | 3.28x10 <sup>-09</sup> |
| CCL4     | 1.141843  | 6.41x10 <sup>-16</sup> | 5.92x10 <sup>-15</sup> |
| RECK     | 1.533455  | 1.22x10 <sup>-37</sup> | 2.91x10 <sup>-35</sup> |
| TCTEX1D1 | 1.210436  | 2.46x10 <sup>-24</sup> | 5.26x10 <sup>-23</sup> |
| JAML     | 1.145820  | 3.66x10 <sup>-20</sup> | 4.90x10 <sup>-19</sup> |
| PGM5     | 2.866895  | 5.51x10 <sup>-25</sup> | 1.29x10 <sup>-23</sup> |
| LMOD1    | 2.858750  | 5.49x10 <sup>-28</sup> | 1.95x10 <sup>-26</sup> |
| MILR1    | 1.306134  | 6.52x10 <sup>-33</sup> | 5.13x10 <sup>-31</sup> |
| LEP      | 1.229365  | 1.69x10 <sup>-04</sup> | 4.35x10 <sup>-04</sup> |
| RASL12   | 1.301872  | 1.63x10 <sup>-29</sup> | 7.27x10 <sup>-28</sup> |
| PECAM1   | 1.134121  | 4.14x10 <sup>-32</sup> | 2.85x10 <sup>-30</sup> |
| CD300C   | 1.168015  | 1.90x10 <sup>-18</sup> | 2.18x10 <sup>-17</sup> |
| SULF1    | 1.552024  | 2.00x10 <sup>-30</sup> | 1.05x10 <sup>-28</sup> |
| EVI2A    | 1.283108  | 9.31x10 <sup>-28</sup> | 3.18x10 <sup>-26</sup> |
| IRS4     | 1.924362  | 7.25x10 <sup>-03</sup> | 1.30x10 <sup>-02</sup> |
| MRC2     | 1.361074  | 4.09x10 <sup>-32</sup> | 2.83x10 <sup>-30</sup> |
| SASH3    | 1.345846  | 3.26x10 <sup>-22</sup> | 5.32x10 <sup>-21</sup> |
| RNF225   | -2.339839 | 3.33x10 <sup>-03</sup> | 6.44x10 <sup>-03</sup> |
| FPR2     | 1.195763  | 4.21x10 <sup>-07</sup> | 1.69x10 <sup>-06</sup> |
| PVALB    | 1.339192  | 1.81x10 <sup>-12</sup> | 1.25x10 <sup>-11</sup> |
| PTH1R    | 1.225772  | 4.31x10 <sup>-19</sup> | 5.26x10 <sup>-18</sup> |
| SFRP1    | 2.905923  | 1.40x10 <sup>-28</sup> | 5.43x10 <sup>-27</sup> |
| CEACAM21 | 1.078707  | 5.26x10 <sup>-22</sup> | 8.42x10 <sup>-21</sup> |
| PLEKHO2  | 1.050795  | 1.18x10 <sup>-37</sup> | 2.87x10 <sup>-35</sup> |
| LTBP2    | 1.441706  | 1.08x10 <sup>-31</sup> | 6.93x10 <sup>-30</sup> |
| CCL18    | 1.353741  | 5.03x10 <sup>-08</sup> | 2.28x10 <sup>-07</sup> |
| MS4A7    | 1.502709  | 1.34x10 <sup>-29</sup> | 6.11x10 <sup>-28</sup> |
| MPEG1    | 1.544061  | 5.03x10 <sup>-25</sup> | 1.18x10 <sup>-23</sup> |
| APELA    | 1.145758  | 2.51x10 <sup>-06</sup> | 9.05x10 <sup>-06</sup> |
| WISP1    | 1.591132  | 4.17x10 <sup>-37</sup> | 8.79x10 <sup>-35</sup> |
| FUT7     | 1.041090  | 1.28x10 <sup>-11</sup> | 8.25x10 <sup>-11</sup> |
| CD300LB  | 1.427874  | 1.68x10 <sup>-24</sup> | 3.70x10 <sup>-23</sup> |
| APBB1    | 1.033319  | 2.06x10 <sup>-16</sup> | 1.99x10 <sup>-15</sup> |
| SCRG1    | 3.280958  | 8.05x10 <sup>-26</sup> | 2.09x10 <sup>-24</sup> |
| HLA-DPA1 | 1.152487  | 1.67x10 <sup>-15</sup> | 1.49x10 <sup>-14</sup> |
| ACSM5    | 1.390145  | 2.79x10 <sup>-19</sup> | 3.46x10 <sup>-18</sup> |
| P2RY14   | 1.686385  | 1.15x10 <sup>-26</sup> | 3.38x10 <sup>-25</sup> |
| PI15     | 1.466669  | 1.43x10 <sup>-08</sup> | 6.95x10 <sup>-08</sup> |
| SORCS2   | 1.549065  | 3.00x10 <sup>-27</sup> | 9.56x10 <sup>-26</sup> |
| ITPR1    | 1.118667  | 2.99x10 <sup>-20</sup> | 4.03x10 <sup>-19</sup> |
| RGS9     | 1.707539  | 4.79x10 <sup>-23</sup> | 8.71x10 <sup>-22</sup> |
| RSPO1    | 2.611418  | 9.12x10 <sup>-28</sup> | 3.12x10 <sup>-26</sup> |
| CDH12    | -1.776940 | 3.25x10 <sup>-02</sup> | 4.93x10 <sup>-02</sup> |
| CD163    | 1.499322  | 1.73x10 <sup>-22</sup> | 2.93x10 <sup>-21</sup> |
| ACTG2    | 3.416017  | 1.45x10 <sup>-23</sup> | 2.84x10 <sup>-22</sup> |
| IL21R    | 1.287169  | 4.79x10 <sup>-17</sup> | 4.88x10 <sup>-16</sup> |
| NLRP3    | 1.423833  | 3.33x10 <sup>-29</sup> | 1.42x10 <sup>-27</sup> |
| MEDAG    | 1.818525  | 1.52x10 <sup>-30</sup> | 8.14x10 <sup>-29</sup> |
| ICAM2    | 1.147239  | 3.41x10 <sup>-19</sup> | 4.19x10 <sup>-18</sup> |
| CCL7     | 1.618405  | 2.03x10 <sup>-05</sup> | 6.25x10 <sup>-05</sup> |
| ESR1     | 1.612803  | 7.32x10 <sup>-29</sup> | 2.98x10 <sup>-27</sup> |
| CD209    | 1.124420  | 2.99x10 <sup>-16</sup> | 2.84x10 <sup>-15</sup> |
| PMP2     | 2.300008  | 4.47x10 <sup>-14</sup> | 3.50x10 <sup>-13</sup> |

Table SII. Continued.

| Gene     | logFC     | P-value                | FDR                    |
|----------|-----------|------------------------|------------------------|
| CTHRC1   | 1.071549  | 6.01x10 <sup>-20</sup> | 7.90x10 <sup>-19</sup> |
| C1QTNF2  | 1.575989  | 8.69x10 <sup>-27</sup> | 2.58x10 <sup>-25</sup> |
| TLX1     | -1.360156 | 3.81x10 <sup>-06</sup> | 1.33x10 <sup>-05</sup> |
| SCRT1    | -2.026128 | 4.40x10 <sup>-03</sup> | 8.29x10 <sup>-03</sup> |
| SCARF2   | 1.407182  | 1.29x10 <sup>-29</sup> | 5.93x10 <sup>-28</sup> |
| FLNA     | 2.048863  | 6.09x10 <sup>-29</sup> | 2.52x10 <sup>-27</sup> |
| CYYR1    | 1.037476  | 1.05x10 <sup>-26</sup> | 3.09x10 <sup>-25</sup> |
| CFP      | 1.361850  | 1.40x10 <sup>-21</sup> | 2.15x10 <sup>-20</sup> |
| WSCD2    | 2.260644  | 1.25x10 <sup>-19</sup> | 1.59x10 <sup>-18</sup> |
| IL36RN   | -3.053549 | 2.10x10 <sup>-03</sup> | 4.26x10 <sup>-03</sup> |
| DCHS1    | 1.201871  | 1.19x10 <sup>-24</sup> | 2.65x10 <sup>-23</sup> |
| ADCY5    | 2.018554  | 5.85x10 <sup>-19</sup> | 7.04x10 <sup>-18</sup> |
| FCMR     | 1.273766  | 3.36x10 <sup>-15</sup> | 2.91x10 <sup>-14</sup> |
| DLC1     | 1.227754  | 2.81x10 <sup>-31</sup> | 1.68x10 <sup>-29</sup> |
| CLECL1   | 1.540054  | 3.10x10 <sup>-20</sup> | 4.17x10 <sup>-19</sup> |
| PTPRC    | 1.431939  | 2.18x10 <sup>-21</sup> | 3.29x10 <sup>-20</sup> |
| SLC14A2  | 1.058855  | 5.80x10 <sup>-04</sup> | 1.33x10 <sup>-03</sup> |
| CNTNAP1  | 1.534607  | 3.67x10 <sup>-27</sup> | 1.16x10 <sup>-25</sup> |
| RCSD1    | 1.317441  | 9.42x10 <sup>-28</sup> | 3.20x10 <sup>-26</sup> |
| DCAF12L2 | 1.106785  | 4.72x10 <sup>-09</sup> | 2.42x10 <sup>-08</sup> |
| ARHGEF15 | 1.096130  | 5.83x10 <sup>-28</sup> | 2.05x10 <sup>-26</sup> |
| C16orf54 | 1.275139  | 1.67x10 <sup>-19</sup> | 2.09x10 <sup>-18</sup> |
| RGMA     | 2.566289  | 4.16x10 <sup>-28</sup> | 1.50x10 <sup>-26</sup> |
| RSPO3    | 2.009461  | 1.04x10 <sup>-33</sup> | 9.33x10 <sup>-32</sup> |
| RNF180   | 1.413967  | 7.59x10 <sup>-24</sup> | 1.55x10 <sup>-22</sup> |
| PKP1     | -3.129251 | 8.31x10 <sup>-03</sup> | 1.47x10 <sup>-02</sup> |
| PPL      | -1.261550 | 2.99x10 <sup>-02</sup> | 4.61x10 <sup>-02</sup> |
| TMEM119  | 1.845386  | 6.34x10 <sup>-37</sup> | 1.23x10 <sup>-34</sup> |
| NUDT11   | 1.228456  | 1.74x10 <sup>-26</sup> | 4.98x10 <sup>-25</sup> |
| TREML1   | 1.169891  | 3.94x10 <sup>-17</sup> | 4.04x10 <sup>-16</sup> |
| MAP1B    | 1.740917  | 4.62x10 <sup>-26</sup> | 1.24x10 <sup>-24</sup> |
| CD8A     | 1.250036  | 1.60x10 <sup>-14</sup> | 1.30x10 <sup>-13</sup> |
| LCP1     | 1.218638  | 1.70x10 <sup>-19</sup> | 2.13x10 <sup>-18</sup> |
| ADAM12   | 1.456937  | 6.27x10 <sup>-19</sup> | 7.52x10 <sup>-18</sup> |
| ELN      | 1.777945  | 1.76x10 <sup>-25</sup> | 4.37x10 <sup>-24</sup> |
| CHN1     | 1.002275  | 1.66x10 <sup>-23</sup> | 3.20x10 <sup>-22</sup> |
| SIGLEC9  | 1.248876  | 1.72x10 <sup>-24</sup> | 3.77x10 <sup>-23</sup> |
| LRRC4C   | 1.330714  | 1.30x10 <sup>-22</sup> | 2.24x10 <sup>-21</sup> |
| COL5A2   | 1.213525  | 4.16x10 <sup>-26</sup> | 1.13x10 <sup>-24</sup> |
| MMRN1    | 1.782270  | 1.08x10 <sup>-22</sup> | 1.86x10 <sup>-21</sup> |
| CRTAC1   | 1.398302  | 3.11x10 <sup>-23</sup> | 5.82x10 <sup>-22</sup> |
| ZNF454   | 1.364618  | 7.96x10 <sup>-26</sup> | 2.07x10 <sup>-24</sup> |
| C3orf80  | 1.046051  | 5.54x10 <sup>-20</sup> | 7.31x10 <sup>-19</sup> |
| FNDC1    | 2.185866  | 4.46x10 <sup>-33</sup> | 3.52x10 <sup>-31</sup> |
| SPOCK1   | 1.276513  | 2.09x10 <sup>-29</sup> | 9.16x10 <sup>-28</sup> |
| GREM1    | 2.268606  | 5.14x10 <sup>-37</sup> | 1.02x10 <sup>-34</sup> |
| OGN      | 3.638150  | 1.28x10 <sup>-28</sup> | 5.02x10 <sup>-27</sup> |
| FOXH1    | -1.375923 | 4.57x10 <sup>-06</sup> | 1.58x10 <sup>-05</sup> |
| TCF23    | 1.927817  | 1.45x10 <sup>-09</sup> | 7.79x10 <sup>-09</sup> |
| OLFML2B  | 1.721577  | 2.15x10 <sup>-36</sup> | 3.61x10 <sup>-34</sup> |
| LYL1     | 1.122053  | 1.49x10 <sup>-20</sup> | 2.07x10 <sup>-19</sup> |
| CD2      | 1.193925  | 1.46x10 <sup>-17</sup> | 1.55x10 <sup>-16</sup> |
| PON1     | -1.590993 | 2.98x10 <sup>-02</sup> | 4.60x10 <sup>-02</sup> |
| PPP1R1B  | -1.627524 | 5.94x10 <sup>-04</sup> | 1.36x10 <sup>-03</sup> |
| PRR29    | 1.220382  | 4.07x10 <sup>-09</sup> | 2.10x10 <sup>-08</sup> |
| CACNA2D1 | 1.116247  | 1.21x10 <sup>-16</sup> | 1.19x10 <sup>-15</sup> |
| SERPINB4 | -1.073920 | 2.38x10 <sup>-02</sup> | 3.76x10 <sup>-02</sup> |
| GFPT2    | 1.803240  | 1.02x10 <sup>-36</sup> | 1.84x10 <sup>-34</sup> |
| NEGR1    | 1.994124  | 4.54x10 <sup>-23</sup> | 8.32x10 <sup>-22</sup> |

Table SII. Continued.

| Gene     | logFC     | P-value                | FDR                    |
|----------|-----------|------------------------|------------------------|
| CLDN5    | 1.137981  | 1.06x10 <sup>-19</sup> | 1.36x10 <sup>-18</sup> |
| DCX      | 1.692950  | 2.64x10 <sup>-07</sup> | 1.09x10 <sup>-06</sup> |
| GJB6     | -2.888729 | 5.71x10 <sup>-03</sup> | 1.05x10 <sup>-02</sup> |
| GUCY1A1  | 2.164598  | 1.70x10 <sup>-42</sup> | 2.02x10 <sup>-39</sup> |
| KLHL38   | 1.104884  | 2.75x10 <sup>-23</sup> | 5.16x10 <sup>-22</sup> |
| HTRA1    | 1.091140  | 1.24x10 <sup>-24</sup> | 2.77x10 <sup>-23</sup> |
| CLEC7A   | 1.127092  | 3.67x10 <sup>-21</sup> | 5.42x10 <sup>-20</sup> |
| PCDH7    | 1.070043  | 3.04x10 <sup>-14</sup> | 2.41x10 <sup>-13</sup> |
| CD53     | 1.375107  | 5.20x10 <sup>-25</sup> | 1.22x10 <sup>-23</sup> |
| TEK      | 1.204706  | 3.35x10 <sup>-28</sup> | 1.24x10 <sup>-26</sup> |
| ISLR2    | 1.651258  | 6.04x10 <sup>-22</sup> | 9.62x10 <sup>-21</sup> |
| TREM2    | 1.470050  | 1.52x10 <sup>-25</sup> | 3.81x10 <sup>-24</sup> |
| DMGDH    | 1.161560  | 6.29x10 <sup>-16</sup> | 5.82x10 <sup>-15</sup> |
| IGFBP7   | 1.372881  | 8.15x10 <sup>-39</sup> | 2.84x10 <sup>-36</sup> |
| EMP3     | 1.196815  | 4.40x10 <sup>-33</sup> | 3.50x10 <sup>-31</sup> |
| CDH19    | 1.885607  | 3.50x10 <sup>-18</sup> | 3.91x10 <sup>-17</sup> |
| PIWIL1   | -1.038754 | 2.73x10 <sup>-03</sup> | 5.38x10 <sup>-03</sup> |
| CPXM1    | 1.757150  | 2.16x10 <sup>-28</sup> | 8.21x10 <sup>-27</sup> |
| TYRP1    | 1.588790  | 2.63x10 <sup>-14</sup> | 2.10x10 <sup>-13</sup> |
| ASB2     | 2.368834  | 1.09x10 <sup>-25</sup> | 2.79x10 <sup>-24</sup> |
| ZCCHC18  | 1.251267  | 1.27x10 <sup>-23</sup> | 2.52x10 <sup>-22</sup> |
| HPGDS    | 1.551771  | 9.35x10 <sup>-19</sup> | 1.10x10 <sup>-17</sup> |
| GAS7     | 1.607352  | 1.92x10 <sup>-36</sup> | 3.35x10 <sup>-34</sup> |
| ITM2A    | 1.002702  | 1.01x10 <sup>-19</sup> | 1.30x10 <sup>-18</sup> |
| MAGI2    | 1.060280  | 1.28x10 <sup>-14</sup> | 1.05x10 <sup>-13</sup> |
| FAM163A  | 1.356289  | 3.52x10 <sup>-09</sup> | 1.83x10 <sup>-08</sup> |
| IL21     | 1.422073  | 5.77x10 <sup>-07</sup> | 2.28x10 <sup>-06</sup> |
| PABPC5   | 1.808368  | 1.33x10 <sup>-37</sup> | 3.11x10 <sup>-35</sup> |
| DUOXA1   | -1.542242 | 1.42x10 <sup>-05</sup> | 4.50x10 <sup>-05</sup> |
| FAM43B   | 1.841195  | 6.83x10 <sup>-25</sup> | 1.58x10 <sup>-23</sup> |
| FGF1     | 1.081724  | 3.94x10 <sup>-24</sup> | 8.28x10 <sup>-23</sup> |
| TIE1     | 1.113626  | 1.48x10 <sup>-28</sup> | 5.74x10 <sup>-27</sup> |
| SH3BP5   | 1.108717  | 8.96x10 <sup>-24</sup> | 1.82x10 <sup>-22</sup> |
| VSTM4    | 1.905981  | 3.47x10 <sup>-42</sup> | 3.82x10 <sup>-39</sup> |
| NCR3     | 1.259142  | 5.87x10 <sup>-13</sup> | 4.23x10 <sup>-12</sup> |
| CLIC2    | 1.203109  | 2.50x10 <sup>-31</sup> | 1.52x10 <sup>-29</sup> |
| FCER2    | 1.656674  | 2.21x10 <sup>-11</sup> | 1.40x10 <sup>-10</sup> |
| SPAG17   | -1.073256 | 1.72x10 <sup>-03</sup> | 3.56x10 <sup>-03</sup> |
| SERPINE1 | 1.077797  | 2.57x10 <sup>-14</sup> | 2.05x10 <sup>-13</sup> |
| POU3F3   | 1.431898  | 6.99x10 <sup>-06</sup> | 2.34x10 <sup>-05</sup> |
| CD79B    | 2.055525  | 1.26x10 <sup>-21</sup> | 1.95x10 <sup>-20</sup> |
| ZNF185   | -1.025850 | 2.01x10 <sup>-02</sup> | 3.23x10 <sup>-02</sup> |
| GIMAP8   | 1.289451  | 1.10x10 <sup>-31</sup> | 7.08x10 <sup>-30</sup> |
| CD27     | 1.466047  | 3.54x10 <sup>-16</sup> | 3.35x10 <sup>-15</sup> |
| MAGEA6   | -1.377634 | 2.50x10 <sup>-02</sup> | 3.94x10 <sup>-02</sup> |
| KRT4     | -4.213916 | 2.15x10 <sup>-02</sup> | 3.43x10 <sup>-02</sup> |
| GSTM5    | 1.873279  | 2.93x10 <sup>-28</sup> | 1.10x10 <sup>-26</sup> |
| FAXC     | 1.173095  | 5.15x10 <sup>-05</sup> | 1.47x10 <sup>-04</sup> |
| CXCR5    | 1.935533  | 4.54x10 <sup>-16</sup> | 4.24x10 <sup>-15</sup> |
| PAMR1    | 1.016459  | 5.32x10 <sup>-14</sup> | 4.13x10 <sup>-13</sup> |
| TCF21    | 1.610216  | 8.58x10 <sup>-33</sup> | 6.57x10 <sup>-31</sup> |
| EHD2     | 1.087702  | 2.32x10 <sup>-22</sup> | 3.85x10 <sup>-21</sup> |
| CORIN    | 1.214500  | 5.35x10 <sup>-17</sup> | 5.43x10 <sup>-16</sup> |
| CHRDL1   | 2.787126  | 4.93x10 <sup>-27</sup> | 1.52x10 <sup>-25</sup> |
| HSPB8    | 2.069776  | 5.76x10 <sup>-26</sup> | 1.52x10 <sup>-24</sup> |
| SYNDIG1  | 1.615339  | 2.09x10 <sup>-31</sup> | 1.29x10 <sup>-29</sup> |
| C5AR1    | 1.343309  | 2.41x10 <sup>-26</sup> | 6.81x10 <sup>-25</sup> |
| MAB21L1  | 1.277479  | 3.30x10 <sup>-13</sup> | 2.42x10 <sup>-12</sup> |
| FCRL1    | 1.577191  | 2.67x10 <sup>-14</sup> | 2.12x10 <sup>-13</sup> |

Table SII. Continued.

| Gene     | logFC     | P-value                | FDR                    |
|----------|-----------|------------------------|------------------------|
| ANTXR1   | 1.526956  | 2.79x10 <sup>-34</sup> | 2.87x10 <sup>-32</sup> |
| SEMA3G   | 1.109785  | 2.53x10 <sup>-19</sup> | 3.15x10 <sup>-18</sup> |
| ZNF354C  | 1.051861  | 2.39x10 <sup>-20</sup> | 3.25x10 <sup>-19</sup> |
| ACTL8    | -1.198290 | 7.62x10 <sup>-04</sup> | 1.71x10 <sup>-03</sup> |
| MDFIC    | 1.117670  | 1.46x10 <sup>-30</sup> | 7.92x10 <sup>-29</sup> |
| PTGER3   | 1.695565  | 1.39x10 <sup>-32</sup> | 1.04x10 <sup>-30</sup> |
| MS4A3    | 4.387839  | 1.92x10 <sup>-02</sup> | 3.10x10 <sup>-02</sup> |
| FOXF1    | 1.610431  | 3.49x10 <sup>-25</sup> | 8.42x10 <sup>-24</sup> |
| TENM2    | 1.008867  | 6.58x10 <sup>-08</sup> | 2.94x10 <sup>-07</sup> |
| ASB4     | -1.299642 | 3.10x10 <sup>-02</sup> | 4.74x10 <sup>-02</sup> |
| KRTAP4-1 | -1.367560 | 1.43x10 <sup>-03</sup> | 3.02x10 <sup>-03</sup> |
| AVPR2    | 1.360541  | 6.11x10 <sup>-13</sup> | 4.39x10 <sup>-12</sup> |
| HSD11B1  | 1.690613  | 4.57x10 <sup>-34</sup> | 4.45x10 <sup>-32</sup> |
| KLB      | -1.488706 | 8.15x10 <sup>-03</sup> | 1.44x10 <sup>-02</sup> |
| GPC6     | 1.492130  | 1.70x10 <sup>-33</sup> | 1.47x10 <sup>-31</sup> |
| TACR2    | 3.247868  | 8.56x10 <sup>-15</sup> | 7.18x10 <sup>-14</sup> |
| C8orf88  | 2.654584  | 1.84x10 <sup>-27</sup> | 6.04x10 <sup>-26</sup> |
| PKNOX2   | 1.634109  | 3.94x10 <sup>-23</sup> | 7.28x10 <sup>-22</sup> |
| TPM1     | 1.290977  | 2.63x10 <sup>-16</sup> | 2.51x10 <sup>-15</sup> |
| TMEM132E | 1.238307  | 1.09x10 <sup>-14</sup> | 9.04x10 <sup>-14</sup> |
| NKPD1    | -1.083241 | 5.04x10 <sup>-07</sup> | 2.00x10 <sup>-06</sup> |
| CCL22    | 1.001336  | 1.58x10 <sup>-16</sup> | 1.54x10 <sup>-15</sup> |
| TNXB     | 2.085036  | 7.05x10 <sup>-19</sup> | 8.41x10 <sup>-18</sup> |
| FAM13C   | 1.571294  | 7.68x10 <sup>-29</sup> | 3.12x10 <sup>-27</sup> |
| PTGFR    | 2.075438  | 6.77x10 <sup>-32</sup> | 4.48x10 <sup>-30</sup> |
| BNC2     | 2.277459  | 8.42x10 <sup>-40</sup> | 4.13x10 <sup>-37</sup> |
| KCNA3    | 1.504748  | 1.51x10 <sup>-18</sup> | 1.75x10 <sup>-17</sup> |
| FGF19    | -1.513765 | 2.13x10 <sup>-02</sup> | 3.41x10 <sup>-02</sup> |
| GDF10    | 1.785641  | 9.05x10 <sup>-21</sup> | 1.28x10 <sup>-19</sup> |
| DPPA2    | -1.872346 | 1.68x10 <sup>-02</sup> | 2.75x10 <sup>-02</sup> |
| TENM4    | 1.154370  | 3.78x10 <sup>-25</sup> | 9.07x10 <sup>-24</sup> |
| ADGRD1   | 1.546526  | 1.26x10 <sup>-23</sup> | 2.50x10 <sup>-22</sup> |
| DOCK2    | 1.415386  | 2.06x10 <sup>-24</sup> | 4.44x10 <sup>-23</sup> |
| SLIT2    | 2.429585  | 7.78x10 <sup>-35</sup> | 8.76x10 <sup>-33</sup> |
| SLC7A3   | 1.635708  | 3.58x10 <sup>-05</sup> | 1.05x10 <sup>-04</sup> |
| SLITRK5  | 1.378720  | 4.79x10 <sup>-12</sup> | 3.21x10 <sup>-11</sup> |
| CCL19    | 1.968715  | 2.41x10 <sup>-24</sup> | 5.16x10 <sup>-23</sup> |
| TIFAB    | 1.436136  | 1.86x10 <sup>-16</sup> | 1.80x10 <sup>-15</sup> |
| FCGR2B   | 1.511723  | 2.77x10 <sup>-29</sup> | 1.19x10 <sup>-27</sup> |
| SLC22A17 | 1.133884  | 8.47x10 <sup>-22</sup> | 1.32x10 <sup>-20</sup> |
| ANK2     | 2.154909  | 2.95x10 <sup>-25</sup> | 7.18x10 <sup>-24</sup> |
| INMT     | 1.921300  | 5.07x10 <sup>-29</sup> | 2.11x10 <sup>-27</sup> |
| PLA2G7   | 1.123588  | 5.31x10 <sup>-16</sup> | 4.94x10 <sup>-15</sup> |
| GAS1     | 2.154424  | 6.05x10 <sup>-34</sup> | 5.69x10 <sup>-32</sup> |
| DACT3    | 2.305154  | 1.36x10 <sup>-30</sup> | 7.37x10 <sup>-29</sup> |
| PILRA    | 1.286310  | 1.76x10 <sup>-24</sup> | 3.84x10 <sup>-23</sup> |
| KRT81    | 2.513532  | 3.26x10 <sup>-02</sup> | 4.95x10 <sup>-02</sup> |
| REP15    | -1.286845 | 3.10x10 <sup>-02</sup> | 4.74x10 <sup>-02</sup> |
| TGFBI    | 1.025972  | 1.97x10 <sup>-22</sup> | 3.31x10 <sup>-21</sup> |
| CASQ2    | 3.464719  | 1.34x10 <sup>-26</sup> | 3.90x10 <sup>-25</sup> |
| TMEM200C | 1.108801  | 3.24x10 <sup>-16</sup> | 3.07x10 <sup>-15</sup> |
| DUOX1    | -1.252734 | 1.49x10 <sup>-05</sup> | 4.70x10 <sup>-05</sup> |
| VIP      | 3.923050  | 1.64x10 <sup>-23</sup> | 3.17x10 <sup>-22</sup> |
| LAMA4    | 1.272790  | 5.86x10 <sup>-36</sup> | 8.47x10 <sup>-34</sup> |
| GRIK5    | 1.869345  | 7.87x10 <sup>-22</sup> | 1.23x10 <sup>-20</sup> |
| CD4      | 1.216585  | 5.26x10 <sup>-25</sup> | 1.23x10 <sup>-23</sup> |
| CLEC11A  | 1.349751  | 2.22x10 <sup>-29</sup> | 9.72x10 <sup>-28</sup> |
| ITGA4    | 1.277515  | 4.39x10 <sup>-23</sup> | 8.06x10 <sup>-22</sup> |
| FCER1G   | 1.139450  | 4.91x10 <sup>-21</sup> | 7.17x10 <sup>-20</sup> |

Table SII. Continued.

| Gene     | logFC     | P-value                | FDR                    |
|----------|-----------|------------------------|------------------------|
| SIGLEC14 | 1.301733  | 1.25x10 <sup>-15</sup> | 1.13x10 <sup>-14</sup> |
| CD177    | 1.174112  | 9.06x10 <sup>-06</sup> | 2.97x10 <sup>-05</sup> |
| ACTA2    | 2.247343  | 9.32x10 <sup>-38</sup> | 2.43x10 <sup>-35</sup> |
| CCDC187  | -1.029924 | 1.45x10 <sup>-04</sup> | 3.78x10 <sup>-04</sup> |
| CSF1R    | 1.533601  | 5.88x10 <sup>-30</sup> | 2.85x10 <sup>-28</sup> |
| GNGT2    | 1.129984  | 6.83x10 <sup>-25</sup> | 1.58x10 <sup>-23</sup> |
| NEXN     | 2.017705  | 2.79x10 <sup>-28</sup> | 1.05x10 <sup>-26</sup> |
| ERG      | 1.253791  | 6.61x10 <sup>-33</sup> | 5.17x10 <sup>-31</sup> |
| RASGRP2  | 1.582809  | 8.14x10 <sup>-26</sup> | 2.12x10 <sup>-24</sup> |
| BTLA     | 1.447928  | 2.95x10 <sup>-16</sup> | 2.80x10 <sup>-15</sup> |
| DOK5     | 1.423497  | 8.32x10 <sup>-34</sup> | 7.69x10 <sup>-32</sup> |
| BEND5    | 1.219994  | 2.14x10 <sup>-16</sup> | 2.06x10 <sup>-15</sup> |
| STX11    | 1.094897  | 5.34x10 <sup>-23</sup> | 9.64x10 <sup>-22</sup> |
| TDRD6    | 1.001084  | 2.03x10 <sup>-15</sup> | 1.79x10 <sup>-14</sup> |
| PRSS1    | -3.218185 | 2.23x10 <sup>-02</sup> | 3.55x10 <sup>-02</sup> |
| PLA2G4C  | 1.042228  | 6.86x10 <sup>-23</sup> | 1.22x10 <sup>-21</sup> |
| CTSG     | 2.378458  | 2.21x10 <sup>-21</sup> | 3.32x10 <sup>-20</sup> |
| MAGEA10  | -1.448739 | 3.27x10 <sup>-02</sup> | 4.97x10 <sup>-02</sup> |
| LAMA2    | 1.896968  | 3.12x10 <sup>-33</sup> | 2.54x10 <sup>-31</sup> |
| SFRP2    | 2.650458  | 2.19x10 <sup>-32</sup> | 1.59x10 <sup>-30</sup> |
| C12orf56 | -1.032729 | 6.39x10 <sup>-04</sup> | 1.46x10 <sup>-03</sup> |
| GUCA1A   | 1.034891  | 1.92x10 <sup>-07</sup> | 8.08x10 <sup>-07</sup> |
| FAM110D  | 1.174903  | 1.75x10 <sup>-21</sup> | 2.67x10 <sup>-20</sup> |
| WDFY4    | 1.475097  | 2.20x10 <sup>-21</sup> | 3.32x10 <sup>-20</sup> |
| KRTAP5-5 | -1.688686 | 4.54x10 <sup>-05</sup> | 1.31x10 <sup>-04</sup> |
| SHISAL1  | 2.323027  | 9.28x10 <sup>-23</sup> | 1.62x10 <sup>-21</sup> |
| FGFRL1   | -1.003850 | 3.65x10 <sup>-08</sup> | 1.69x10 <sup>-07</sup> |
| NGF      | 1.099117  | 5.01x10 <sup>-21</sup> | 7.29x10 <sup>-20</sup> |
| PAPLN    | 1.233113  | 1.57x10 <sup>-18</sup> | 1.81x10 <sup>-17</sup> |
| FBXL22   | 1.877674  | 2.22x10 <sup>-18</sup> | 2.52x10 <sup>-17</sup> |
| SH2D1A   | 1.206996  | 2.54x10 <sup>-16</sup> | 2.43x10 <sup>-15</sup> |
| VENTX    | 1.031436  | 1.80x10 <sup>-25</sup> | 4.46x10 <sup>-24</sup> |
| MXRA7    | 1.133632  | 7.96x10 <sup>-20</sup> | 1.03x10 <sup>-18</sup> |
| LCN12    | -1.310795 | 6.02x10 <sup>-07</sup> | 2.37x10 <sup>-06</sup> |
| CCL3L1   | 1.167684  | 1.82x10 <sup>-05</sup> | 5.66x10 <sup>-05</sup> |
| S1PR3    | 1.530130  | 5.06x10 <sup>-30</sup> | 2.50x10 <sup>-28</sup> |
| AIF1     | 1.253754  | 5.49x10 <sup>-28</sup> | 1.95x10 <sup>-26</sup> |
| FLNC     | 3.074174  | 1.29x10 <sup>-19</sup> | 1.63x10 <sup>-18</sup> |
| IL6      | 1.223304  | 1.45x10 <sup>-09</sup> | 7.79x10 <sup>-09</sup> |
| RPTN     | -2.994910 | 1.81x10 <sup>-03</sup> | 3.73x10 <sup>-03</sup> |
| MEF2B    | 1.829923  | 1.72x10 <sup>-02</sup> | 2.81x10 <sup>-02</sup> |
| COL4A3   | 1.183641  | 2.16x10 <sup>-10</sup> | 1.25x10 <sup>-09</sup> |
| THSD7A   | 1.287614  | 8.59x10 <sup>-27</sup> | 2.55x10 <sup>-25</sup> |
| XCR1     | 1.686735  | 1.49x10 <sup>-14</sup> | 1.22x10 <sup>-13</sup> |
| HMCN1    | 1.995107  | 2.01x10 <sup>-29</sup> | 8.88x10 <sup>-28</sup> |
| AQP2     | -2.386435 | 1.18x10 <sup>-02</sup> | 2.01x10 <sup>-02</sup> |
| PRDM6    | 1.568824  | 1.30x10 <sup>-27</sup> | 4.36x10 <sup>-26</sup> |
| WFDC12   | -1.080321 | 7.57x10 <sup>-03</sup> | 1.35x10 <sup>-02</sup> |
| ADAMTS12 | 1.319634  | 3.87x10 <sup>-21</sup> | 5.70x10 <sup>-20</sup> |
| ROR2     | 1.590901  | 6.73x10 <sup>-28</sup> | 2.35x10 <sup>-26</sup> |
| PTGIS    | 2.409712  | 1.37x10 <sup>-29</sup> | 6.20x10 <sup>-28</sup> |
| PPFIA2   | 1.475364  | 2.67x10 <sup>-24</sup> | 5.68x10 <sup>-23</sup> |
| GDF6     | 1.888724  | 1.91x10 <sup>-28</sup> | 7.30x10 <sup>-27</sup> |
| COL4A4   | 1.258008  | 3.54x10 <sup>-16</sup> | 3.35x10 <sup>-15</sup> |
| ATP10A   | 1.015571  | 3.94x10 <sup>-27</sup> | 1.23x10 <sup>-25</sup> |
| PDGFRB   | 1.432809  | 2.73x10 <sup>-38</sup> | 8.49x10 <sup>-36</sup> |
| TMEM273  | 1.446877  | 2.43x10 <sup>-36</sup> | 3.95x10 <sup>-34</sup> |
| KCNA1    | 3.340945  | 9.03x10 <sup>-21</sup> | 1.28x10 <sup>-19</sup> |
| EVI2B    | 1.343468  | 2.15x10 <sup>-24</sup> | 4.63x10 <sup>-23</sup> |

Table SII. Continued.

| Gene       | logFC     | P-value                | FDR                    |
|------------|-----------|------------------------|------------------------|
| TNFSF18    | 1.293555  | 7.42x10 <sup>-09</sup> | 3.74x10 <sup>-08</sup> |
| KNG1       | -1.220889 | 1.30x10 <sup>-02</sup> | 2.18x10 <sup>-02</sup> |
| LILRA4     | 1.826671  | 9.98x10 <sup>-22</sup> | 1.55x10 <sup>-20</sup> |
| VCAM1      | 1.427813  | 1.77x10 <sup>-33</sup> | 1.50x10 <sup>-31</sup> |
| FCRL5      | 1.196888  | 4.14x10 <sup>-12</sup> | 2.79x10 <sup>-11</sup> |
| CD1E       | 1.599363  | 1.69x10 <sup>-18</sup> | 1.95x10 <sup>-17</sup> |
| SIRPG      | 1.041194  | 1.55x10 <sup>-12</sup> | 1.08x10 <sup>-11</sup> |
| RASD2      | 1.011750  | 3.56x10 <sup>-14</sup> | 2.81x10 <sup>-13</sup> |
| PRKD1      | 1.400782  | 1.79x10 <sup>-30</sup> | 9.44x10 <sup>-29</sup> |
| TSC22D3    | 1.142432  | 1.46x10 <sup>-20</sup> | 2.03x10 <sup>-19</sup> |
| DTNA       | 1.154736  | 1.22x10 <sup>-14</sup> | 1.00x10 <sup>-13</sup> |
| SYNPO2     | 3.263366  | 5.82x10 <sup>-27</sup> | 1.76x10 <sup>-25</sup> |
| S100A7     | -1.390279 | 1.05x10 <sup>-03</sup> | 2.29x10 <sup>-03</sup> |
| DAB2       | 1.000952  | 9.46x10 <sup>-29</sup> | 3.79x10 <sup>-27</sup> |
| CD3E       | 1.068665  | 1.45x10 <sup>-14</sup> | 1.19x10 <sup>-13</sup> |
| SLFN12L    | 1.089449  | 8.08x10 <sup>-16</sup> | 7.40x10 <sup>-15</sup> |
| SUSD5      | 1.864666  | 1.49x10 <sup>-19</sup> | 1.88x10 <sup>-18</sup> |
| DDR2       | 2.109748  | 4.68x10 <sup>-42</sup> | 4.46x10 <sup>-39</sup> |
| PRSS23     | 1.234271  | 1.52x10 <sup>-30</sup> | 8.14x10 <sup>-29</sup> |
| ANGPTL2    | 1.687981  | 1.97x10 <sup>-38</sup> | 6.50x10 <sup>-36</sup> |
| TCEAL2     | 1.719375  | 5.86x10 <sup>-21</sup> | 8.48x10 <sup>-20</sup> |
| TTC28      | 1.098385  | 1.18x10 <sup>-19</sup> | 1.50x10 <sup>-18</sup> |
| CNRIP1     | 1.422267  | 8.60x10 <sup>-42</sup> | 6.83x10 <sup>-39</sup> |
| TMEM130    | 1.659129  | 4.30x10 <sup>-23</sup> | 7.90x10 <sup>-22</sup> |
| MAGEA3     | -1.038283 | 2.70x10 <sup>-02</sup> | 4.21x10 <sup>-02</sup> |
| IGFBP4     | 1.335459  | 4.16x10 <sup>-28</sup> | 1.50x10 <sup>-26</sup> |
| MYBPC2     | 1.944744  | 4.80x10 <sup>-07</sup> | 1.91x10 <sup>-06</sup> |
| CALML5     | -1.216137 | 3.34x10 <sup>-04</sup> | 8.08x10 <sup>-04</sup> |
| SHH        | -1.359937 | 3.13x10 <sup>-02</sup> | 4.78x10 <sup>-02</sup> |
| MUSK       | 1.164727  | 4.43x10 <sup>-14</sup> | 3.47x10 <sup>-13</sup> |
| STMN2      | 1.755174  | 1.87x10 <sup>-17</sup> | 1.97x10 <sup>-16</sup> |
| DOK3       | 1.176273  | 1.09x10 <sup>-21</sup> | 1.69x10 <sup>-20</sup> |
| DLX4       | -1.348688 | 4.19x10 <sup>-05</sup> | 1.22x10 <sup>-04</sup> |
| ADGRB3     | 1.517849  | 1.48x10 <sup>-23</sup> | 2.89x10 <sup>-22</sup> |
| MYOC       | 2.467884  | 2.47x10 <sup>-18</sup> | 2.79x10 <sup>-17</sup> |
| S100B      | 1.238195  | 1.03x10 <sup>-18</sup> | 1.20x10 <sup>-17</sup> |
| CD180      | 1.200692  | 2.50x10 <sup>-22</sup> | 4.13x10 <sup>-21</sup> |
| PPP1R1A    | 1.386445  | 1.55x10 <sup>-08</sup> | 7.51x10 <sup>-08</sup> |
| ARHGAP31   | 1.265661  | 2.02x10 <sup>-37</sup> | 4.58x10 <sup>-35</sup> |
| ST6GALNAC5 | 1.734291  | 4.98x10 <sup>-35</sup> | 5.99x10 <sup>-33</sup> |
| PAH        | -1.763229 | 4.27x10 <sup>-04</sup> | 1.01x10 <sup>-03</sup> |
| PLCXD3     | 1.196320  | 1.98x10 <sup>-12</sup> | 1.37x10 <sup>-11</sup> |
| FBXL7      | 1.593280  | 8.66x10 <sup>-40</sup> | 4.13x10 <sup>-37</sup> |
| ICAM3      | 1.263579  | 3.37x10 <sup>-17</sup> | 3.47x10 <sup>-16</sup> |
| PSD        | 2.252837  | 3.51x10 <sup>-19</sup> | 4.31x10 <sup>-18</sup> |
| CCL13      | 1.215423  | 2.22x10 <sup>-14</sup> | 1.79x10 <sup>-13</sup> |
| AC004233.2 | -1.176795 | 1.81x10 <sup>-05</sup> | 5.64x10 <sup>-05</sup> |
| CDO1       | 1.864826  | 1.77x10 <sup>-33</sup> | 1.50x10 <sup>-31</sup> |
| MZB1       | 1.036473  | 5.53x10 <sup>-09</sup> | 2.82x10 <sup>-08</sup> |
| CCDC69     | 1.628020  | 1.71x10 <sup>-27</sup> | 5.68x10 <sup>-26</sup> |
| CXCL12     | 1.398923  | 1.73x10 <sup>-27</sup> | 5.72x10 <sup>-26</sup> |
| TMEM204    | 1.018959  | 1.03x10 <sup>-30</sup> | 5.72x10 <sup>-29</sup> |
| GPR162     | 1.127483  | 8.46x10 <sup>-28</sup> | 2.90x10 <sup>-26</sup> |
| GAP43      | 1.606339  | 1.09x10 <sup>-15</sup> | 9.88x10 <sup>-15</sup> |
| CD37       | 1.501743  | 1.31x10 <sup>-25</sup> | 3.31x10 <sup>-24</sup> |
| PDZD4      | 2.023730  | 1.81x10 <sup>-22</sup> | 3.05x10 <sup>-21</sup> |
| OLR1       | 1.479325  | 4.25x10 <sup>-22</sup> | 6.86x10 <sup>-21</sup> |
| ITGB2      | 1.409761  | 7.39x10 <sup>-25</sup> | 1.71x10 <sup>-23</sup> |
| LRRC32     | 1.564513  | 5.78x10 <sup>-39</sup> | 2.07x10 <sup>-36</sup> |

Table SII. Continued.

| Gene      | logFC     | P-value                | FDR                    |
|-----------|-----------|------------------------|------------------------|
| TSPAN9    | 1.061527  | 3.19x10 <sup>-22</sup> | 5.21x10 <sup>-21</sup> |
| MIEN1     | -1.063676 | 5.03x10 <sup>-05</sup> | 1.44x10 <sup>-04</sup> |
| PLA2G4D   | -1.041489 | 1.13x10 <sup>-06</sup> | 4.29x10 <sup>-06</sup> |
| PALLD     | 1.543258  | 1.03x10 <sup>-31</sup> | 6.73x10 <sup>-30</sup> |
| CALML3    | -4.987752 | 1.54x10 <sup>-02</sup> | 2.55x10 <sup>-02</sup> |
| ZFHX4     | 1.506786  | 1.49x10 <sup>-24</sup> | 3.28x10 <sup>-23</sup> |
| CCL21     | 1.378081  | 6.08x10 <sup>-24</sup> | 1.26x10 <sup>-22</sup> |
| SIRPB1    | 1.145845  | 1.61x10 <sup>-15</sup> | 1.44x10 <sup>-14</sup> |
| GPR34     | 1.452649  | 9.57x10 <sup>-29</sup> | 3.83x10 <sup>-27</sup> |
| OR7E47P   | 1.182328  | 4.53x10 <sup>-19</sup> | 5.51x10 <sup>-18</sup> |
| RHCG      | -3.668857 | 1.01x10 <sup>-02</sup> | 1.75x10 <sup>-02</sup> |
| NTN1      | 1.597980  | 7.52x10 <sup>-16</sup> | 6.91x10 <sup>-15</sup> |
| CLCA4     | -2.448420 | 2.88x10 <sup>-03</sup> | 5.65x10 <sup>-03</sup> |
| DEFB1     | -1.416709 | 2.86x10 <sup>-04</sup> | 7.04x10 <sup>-04</sup> |
| GPNMB     | 1.569534  | 2.09x10 <sup>-29</sup> | 9.16x10 <sup>-28</sup> |
| HCK       | 1.178283  | 8.19x10 <sup>-25</sup> | 1.87x10 <sup>-23</sup> |
| PCDH9     | 1.938856  | 2.58x10 <sup>-21</sup> | 3.85x10 <sup>-20</sup> |
| FLRT2     | 1.815441  | 6.30x10 <sup>-34</sup> | 5.89x10 <sup>-32</sup> |
| CYSRT1    | -1.679160 | 2.28x10 <sup>-03</sup> | 4.60x10 <sup>-03</sup> |
| CCL8      | 1.186163  | 5.33x10 <sup>-12</sup> | 3.57x10 <sup>-11</sup> |
| CNR2      | 1.614262  | 4.52x10 <sup>-11</sup> | 2.78x10 <sup>-10</sup> |
| RIPOR2    | 1.276089  | 5.85x10 <sup>-22</sup> | 9.33x10 <sup>-21</sup> |
| SVEP1     | 2.269616  | 6.89x10 <sup>-35</sup> | 7.95x10 <sup>-33</sup> |
| CLMP      | 2.071824  | 1.44x10 <sup>-37</sup> | 3.33x10 <sup>-35</sup> |
| TEX19     | -1.208349 | 2.83x10 <sup>-03</sup> | 5.57x10 <sup>-03</sup> |
| SLC26A9   | -1.048413 | 1.58x10 <sup>-02</sup> | 2.60x10 <sup>-02</sup> |
| CACNA1H   | 1.636507  | 5.21x10 <sup>-22</sup> | 8.34x10 <sup>-21</sup> |
| CCM2L     | 1.126496  | 3.87x10 <sup>-22</sup> | 6.29x10 <sup>-21</sup> |
| CD79A     | 1.534624  | 1.58x10 <sup>-13</sup> | 1.19x10 <sup>-12</sup> |
| CLIP3     | 1.889773  | 2.34x10 <sup>-34</sup> | 2.48x10 <sup>-32</sup> |
| HSPA12B   | 1.115717  | 5.80x10 <sup>-29</sup> | 2.40x10 <sup>-27</sup> |
| SLAMF6    | 1.262125  | 1.05x10 <sup>-17</sup> | 1.13x10 <sup>-16</sup> |
| TIMP2     | 1.333465  | 3.95x10 <sup>-34</sup> | 3.87x10 <sup>-32</sup> |
| C1QTNF4   | 1.600157  | 2.10x10 <sup>-14</sup> | 1.69x10 <sup>-13</sup> |
| CHI3L2    | 1.217346  | 9.71x10 <sup>-21</sup> | 1.37x10 <sup>-19</sup> |
| TRAT1     | 1.434524  | 4.29x10 <sup>-17</sup> | 4.38x10 <sup>-16</sup> |
| GIMAP5    | 1.347167  | 9.09x10 <sup>-23</sup> | 1.59x10 <sup>-21</sup> |
| STUM      | 1.902428  | 5.63x10 <sup>-19</sup> | 6.79x10 <sup>-18</sup> |
| RTL5      | 1.410250  | 7.91x10 <sup>-27</sup> | 2.36x10 <sup>-25</sup> |
| SOX17     | 1.139200  | 3.87x10 <sup>-25</sup> | 9.23x10 <sup>-24</sup> |
| CXCR3     | 1.171082  | 1.72x10 <sup>-14</sup> | 1.40x10 <sup>-13</sup> |
| SYNM      | 3.161476  | 5.41x10 <sup>-19</sup> | 6.54x10 <sup>-18</sup> |
| CLIC4     | 1.215473  | 1.73x10 <sup>-31</sup> | 1.07x10 <sup>-29</sup> |
| TMPRSS11B | -3.902398 | 7.23x10 <sup>-04</sup> | 1.63x10 <sup>-03</sup> |
| SPINK4    | -1.220637 | 5.00x10 <sup>-03</sup> | 9.30x10 <sup>-03</sup> |
| PRPH      | 1.001091  | 4.10x10 <sup>-07</sup> | 1.65x10 <sup>-06</sup> |
| FAM124A   | 1.534966  | 1.55x10 <sup>-23</sup> | 3.01x10 <sup>-22</sup> |
| TMTC1     | 1.416373  | 2.01x10 <sup>-24</sup> | 4.35x10 <sup>-23</sup> |
| ICOS      | 1.053674  | 1.05x10 <sup>-12</sup> | 7.38x10 <sup>-12</sup> |
| GIMAP6    | 1.325289  | 3.66x10 <sup>-33</sup> | 2.96x10 <sup>-31</sup> |
| MSRB3     | 2.088653  | 7.57x10 <sup>-35</sup> | 8.60x10 <sup>-33</sup> |
| LSP1      | 1.260262  | 2.45x10 <sup>-27</sup> | 7.91x10 <sup>-26</sup> |
| FMN2      | 1.128204  | 2.49x10 <sup>-14</sup> | 2.00x10 <sup>-13</sup> |
| CA9       | -1.338450 | 1.20x10 <sup>-02</sup> | 2.05x10 <sup>-02</sup> |
| LUM       | 1.755592  | 2.45x10 <sup>-40</sup> | 1.30x10 <sup>-37</sup> |
| FCRL6     | 1.393550  | 3.59x10 <sup>-18</sup> | 4.00x10 <sup>-17</sup> |
| CSF2RB    | 1.549117  | 1.24x10 <sup>-26</sup> | 3.60x10 <sup>-25</sup> |
| CACNB2    | 1.211336  | 5.02x10 <sup>-14</sup> | 3.91x10 <sup>-13</sup> |
| AKAP6     | 1.865497  | 1.17x10 <sup>-12</sup> | 8.20x10 <sup>-12</sup> |

Table SII. Continued.

| Gene     | logFC     | P-value                | FDR                    |
|----------|-----------|------------------------|------------------------|
| KCTD8    | 1.431153  | 1.17x10 <sup>-11</sup> | 7.61x10 <sup>-11</sup> |
| SPI1     | 1.214539  | 2.30x10 <sup>-26</sup> | 6.53x10 <sup>-25</sup> |
| NAP1L3   | 2.091020  | 5.86x10 <sup>-38</sup> | 1.68x10 <sup>-35</sup> |
| SEPT1    | 1.014796  | 7.05x10 <sup>-13</sup> | 5.03x10 <sup>-12</sup> |
| PDGFRL   | 1.560517  | 8.12x10 <sup>-22</sup> | 1.27x10 <sup>-20</sup> |
| MAMDC2   | 1.756727  | 2.24x10 <sup>-16</sup> | 2.15x10 <sup>-15</sup> |
| TGFB3    | 1.690636  | 3.32x10 <sup>-35</sup> | 4.20x10 <sup>-33</sup> |
| GRASP    | 1.084384  | 3.01x10 <sup>-25</sup> | 7.32x10 <sup>-24</sup> |
| LYPD2    | -2.085967 | 5.84x10 <sup>-03</sup> | 1.07x10 <sup>-02</sup> |
| ASPG     | -1.577761 | 2.13x10 <sup>-05</sup> | 6.53x10 <sup>-05</sup> |
| KLF9     | 1.152200  | 6.25x10 <sup>-20</sup> | 8.21x10 <sup>-19</sup> |
| SHISA8   | 1.170494  | 3.01x10 <sup>-04</sup> | 7.37x10 <sup>-04</sup> |
| HDC      | 1.028956  | 9.28x10 <sup>-14</sup> | 7.07x10 <sup>-13</sup> |
| NRP2     | 1.381977  | 7.63x10 <sup>-33</sup> | 5.90x10 <sup>-31</sup> |
| TSPAN18  | 1.155699  | 7.13x10 <sup>-16</sup> | 6.57x10 <sup>-15</sup> |
| SNURF    | 1.012405  | 9.66x10 <sup>-18</sup> | 1.05x10 <sup>-16</sup> |
| SERPINF1 | 1.742665  | 3.82x10 <sup>-41</sup> | 2.28x10 <sup>-38</sup> |
| LILRA5   | 1.014727  | 1.06x10 <sup>-16</sup> | 1.04x10 <sup>-15</sup> |
| LCE1E    | 1.430037  | 1.32x10 <sup>-02</sup> | 2.21x10 <sup>-02</sup> |
| LCP2     | 1.051326  | 1.81x10 <sup>-22</sup> | 3.05x10 <sup>-21</sup> |
| KLK12    | -2.734883 | 1.90x10 <sup>-04</sup> | 4.85x10 <sup>-04</sup> |
| LPP      | 1.131202  | 3.56x10 <sup>-10</sup> | 2.02x10 <sup>-09</sup> |
| SPARCL1  | 2.182996  | 5.16x10 <sup>-34</sup> | 4.89x10 <sup>-32</sup> |
| KCNA2    | 1.237699  | 2.75x10 <sup>-16</sup> | 2.62x10 <sup>-15</sup> |
| VIPR2    | 1.647677  | 8.76x10 <sup>-25</sup> | 1.98x10 <sup>-23</sup> |
| MS4A4E   | 1.477023  | 1.67x10 <sup>-17</sup> | 1.76x10 <sup>-16</sup> |
| FAXDC2   | 1.232135  | 7.31x10 <sup>-11</sup> | 4.41x10 <sup>-10</sup> |
| DES      | 3.385201  | 3.80x10 <sup>-19</sup> | 4.64x10 <sup>-18</sup> |
| SEPT6    | 1.123196  | 2.63x10 <sup>-19</sup> | 3.27x10 <sup>-18</sup> |
| ACTC1    | 1.675646  | 3.90x10 <sup>-13</sup> | 2.84x10 <sup>-12</sup> |
| VIT      | 1.060171  | 7.78x10 <sup>-06</sup> | 2.58x10 <sup>-05</sup> |
| ADGRE3   | 1.394784  | 1.29x10 <sup>-09</sup> | 6.97x10 <sup>-09</sup> |
| CCR1     | 1.200546  | 4.74x10 <sup>-23</sup> | 8.62x10 <sup>-22</sup> |
| PLA2G2D  | 1.509345  | 2.42x10 <sup>-14</sup> | 1.94x10 <sup>-13</sup> |
| LRRC55   | 1.293962  | 1.21x10 <sup>-16</sup> | 1.19x10 <sup>-15</sup> |
| NRXN1    | 1.746740  | 4.92x10 <sup>-18</sup> | 5.45x10 <sup>-17</sup> |
| IKZF3    | 1.384096  | 1.66x10 <sup>-11</sup> | 1.06x10 <sup>-10</sup> |
| AKAP2    | 1.335448  | 2.63x10 <sup>-22</sup> | 4.34x10 <sup>-21</sup> |
| TRARG1   | 2.356144  | 1.92x10 <sup>-07</sup> | 8.06x10 <sup>-07</sup> |
| ATP6V0A4 | -1.143966 | 1.76x10 <sup>-03</sup> | 3.63x10 <sup>-03</sup> |
| CXCL13   | 1.616486  | 2.77x10 <sup>-14</sup> | 2.20x10 <sup>-13</sup> |
| FMNL1    | 1.045733  | 5.94x10 <sup>-24</sup> | 1.23x10 <sup>-22</sup> |
| PDCD1LG2 | 1.475705  | 6.32x10 <sup>-29</sup> | 2.59x10 <sup>-27</sup> |
| NCAM2    | 1.668706  | 2.51x10 <sup>-29</sup> | 1.08x10 <sup>-27</sup> |
| SLA2     | 1.010200  | 1.03x10 <sup>-14</sup> | 8.54x10 <sup>-14</sup> |
| PDLIM7   | 1.109331  | 1.49x10 <sup>-22</sup> | 2.55x10 <sup>-21</sup> |
| ADAMTS2  | 1.522722  | 1.10x10 <sup>-29</sup> | 5.11x10 <sup>-28</sup> |
| LGI4     | 1.688467  | 1.50x10 <sup>-31</sup> | 9.42x10 <sup>-30</sup> |
| FOXS1    | 1.424068  | 3.87x10 <sup>-25</sup> | 9.23x10 <sup>-24</sup> |
| PLPPR1   | -1.036161 | 1.63x10 <sup>-02</sup> | 2.67x10 <sup>-02</sup> |
| DNAH2    | -1.022935 | 2.76x10 <sup>-04</sup> | 6.82x10 <sup>-04</sup> |
| P4HA3    | 1.470415  | 7.50x10 <sup>-28</sup> | 2.60x10 <sup>-26</sup> |
| IFFO1    | 1.248158  | 1.80x10 <sup>-41</sup> | 1.24x10 <sup>-38</sup> |
| FERMT2   | 1.798269  | 6.53x10 <sup>-35</sup> | 7.59x10 <sup>-33</sup> |
| CHSY3    | 1.075447  | 1.48x10 <sup>-29</sup> | 6.66x10 <sup>-28</sup> |
| NOTUM    | -3.170327 | 2.65x10 <sup>-03</sup> | 5.25x10 <sup>-03</sup> |
| FNDC5    | 1.339441  | 1.27x10 <sup>-13</sup> | 9.54x10 <sup>-13</sup> |
| GAL3ST4  | 1.047191  | 3.95x10 <sup>-22</sup> | 6.41x10 <sup>-21</sup> |
| APLN     | 1.151846  | 1.45x10 <sup>-20</sup> | 2.01x10 <sup>-19</sup> |

Table SII. Continued.

| Gene       | logFC     | P-value                | FDR                    |
|------------|-----------|------------------------|------------------------|
| NKX3-2     | 2.171451  | 2.11x10 <sup>-18</sup> | 2.41x10 <sup>-17</sup> |
| AMOTL1     | 1.035118  | 7.13x10 <sup>-18</sup> | 7.80x10 <sup>-17</sup> |
| FAM198B    | 1.096898  | 1.39x10 <sup>-26</sup> | 4.03x10 <sup>-25</sup> |
| AGXT       | -1.140131 | 1.39x10 <sup>-03</sup> | 2.95x10 <sup>-03</sup> |
| MYLK       | 2.772038  | 2.60x10 <sup>-36</sup> | 4.19x10 <sup>-34</sup> |
| PABPC4L    | 1.545725  | 1.95x10 <sup>-32</sup> | 1.43x10 <sup>-30</sup> |
| EBI3       | 1.400728  | 1.51x10 <sup>-18</sup> | 1.75x10 <sup>-17</sup> |
| CNTN2      | 1.852863  | 1.69x10 <sup>-12</sup> | 1.18x10 <sup>-11</sup> |
| SELE       | 1.188084  | 5.54x10 <sup>-12</sup> | 3.71x10 <sup>-11</sup> |
| HLA-DOA    | 1.323824  | 4.62x10 <sup>-21</sup> | 6.75x10 <sup>-20</sup> |
| C4B        | 1.451421  | 2.18x10 <sup>-18</sup> | 2.48x10 <sup>-17</sup> |
| ZCCHC24    | 1.878078  | 2.78x10 <sup>-35</sup> | 3.65x10 <sup>-33</sup> |
| FAM19A4    | 2.462282  | 1.62x10 <sup>-11</sup> | 1.04x10 <sup>-10</sup> |
| STARD9     | 1.280055  | 3.62x10 <sup>-20</sup> | 4.86x10 <sup>-19</sup> |
| SYDE1      | 1.389613  | 6.88x10 <sup>-42</sup> | 6.15x10 <sup>-39</sup> |
| SNX20      | 1.188144  | 6.30x10 <sup>-22</sup> | 1.00x10 <sup>-20</sup> |
| KANK2      | 1.433266  | 2.69x10 <sup>-25</sup> | 6.56x10 <sup>-24</sup> |
| SCIMP      | 1.430167  | 3.58x10 <sup>-27</sup> | 1.14x10 <sup>-25</sup> |
| BGN        | 1.470590  | 3.76x10 <sup>-33</sup> | 3.02x10 <sup>-31</sup> |
| CRHBP      | 1.233238  | 9.48x10 <sup>-16</sup> | 8.63x10 <sup>-15</sup> |
| HLA-DMB    | 1.018478  | 2.65x10 <sup>-16</sup> | 2.53x10 <sup>-15</sup> |
| ARHGAP15   | 1.421187  | 1.05x10 <sup>-30</sup> | 5.84x10 <sup>-29</sup> |
| FMNL3      | 1.096608  | 5.62x10 <sup>-35</sup> | 6.65x10 <sup>-33</sup> |
| PGR        | 2.150130  | 1.00x10 <sup>-27</sup> | 3.39x10 <sup>-26</sup> |
| ZNF781     | 1.129332  | 3.37x10 <sup>-19</sup> | 4.15x10 <sup>-18</sup> |
| DCN        | 1.920128  | 3.85x10 <sup>-42</sup> | 3.94x10 <sup>-39</sup> |
| CCR5       | 1.405921  | 5.40x10 <sup>-23</sup> | 9.74x10 <sup>-22</sup> |
| OLFML1     | 1.454146  | 9.72x10 <sup>-40</sup> | 4.22x10 <sup>-37</sup> |
| AVPR1A     | 1.232723  | 7.31x10 <sup>-22</sup> | 1.15x10 <sup>-20</sup> |
| CLEC4D     | 1.345077  | 6.85x10 <sup>-10</sup> | 3.80x10 <sup>-09</sup> |
| PTGDR      | 1.444186  | 1.49x10 <sup>-26</sup> | 4.31x10 <sup>-25</sup> |
| CYBB       | 1.370461  | 2.07x10 <sup>-25</sup> | 5.09x10 <sup>-24</sup> |
| C1S        | 1.701025  | 1.14x10 <sup>-46</sup> | 1.63x10 <sup>-42</sup> |
| FGD2       | 1.122937  | 1.03x10 <sup>-22</sup> | 1.79x10 <sup>-21</sup> |
| BVES       | 1.849361  | 2.32x10 <sup>-21</sup> | 3.49x10 <sup>-20</sup> |
| SELL       | 1.459601  | 3.19x10 <sup>-24</sup> | 6.72x10 <sup>-23</sup> |
| ALDH1A3    | 1.003946  | 1.42x10 <sup>-18</sup> | 1.65x10 <sup>-17</sup> |
| PALM       | 1.143597  | 8.21x10 <sup>-22</sup> | 1.28x10 <sup>-20</sup> |
| LIPN       | 1.158493  | 1.96x10 <sup>-03</sup> | 4.01x10 <sup>-03</sup> |
| CLEC4A     | 1.021197  | 1.24x10 <sup>-19</sup> | 1.58x10 <sup>-18</sup> |
| ABI3       | 1.104130  | 8.53x10 <sup>-26</sup> | 2.21x10 <sup>-24</sup> |
| PTPN5      | 1.660466  | 7.57x10 <sup>-20</sup> | 9.85x10 <sup>-19</sup> |
| PIK3CG     | 1.513782  | 1.45x10 <sup>-21</sup> | 2.22x10 <sup>-20</sup> |
| PLXNC1     | 1.249687  | 1.93x10 <sup>-30</sup> | 1.01x10 <sup>-28</sup> |
| AC119396.1 | 1.854062  | 4.52x10 <sup>-16</sup> | 4.22x10 <sup>-15</sup> |
| THEMIS2    | 1.076414  | 2.38x10 <sup>-24</sup> | 5.11x10 <sup>-23</sup> |
| SLC38A3    | -2.524508 | 1.22x10 <sup>-02</sup> | 2.07x10 <sup>-02</sup> |
| FOLR2      | 1.416620  | 6.98x10 <sup>-20</sup> | 9.12x10 <sup>-19</sup> |
| GRB7       | -1.069319 | 8.81x10 <sup>-13</sup> | 6.25x10 <sup>-12</sup> |
| CD84       | 1.379645  | 3.26x10 <sup>-26</sup> | 8.97x10 <sup>-25</sup> |
| IGFBP5     | 1.562042  | 9.34x10 <sup>-32</sup> | 6.13x10 <sup>-30</sup> |
| ITGAL      | 1.234965  | 1.22x10 <sup>-18</sup> | 1.42x10 <sup>-17</sup> |
| COL6A2     | 1.514556  | 2.20x10 <sup>-37</sup> | 4.91x10 <sup>-35</sup> |
| SGCD       | 2.084230  | 4.39x10 <sup>-36</sup> | 6.62x10 <sup>-34</sup> |
| MAN1C1     | 1.189483  | 4.81x10 <sup>-25</sup> | 1.13x10 <sup>-23</sup> |
| SIGLEC6    | 1.682049  | 1.72x10 <sup>-20</sup> | 2.37x10 <sup>-19</sup> |
| MAGEA12    | -1.396728 | 1.94x10 <sup>-02</sup> | 3.12x10 <sup>-02</sup> |
| BTK        | 1.477769  | 6.70x10 <sup>-27</sup> | 2.02x10 <sup>-25</sup> |
| SFRP4      | 2.386777  | 1.25x10 <sup>-34</sup> | 1.35x10 <sup>-32</sup> |

Table SII. Continued.

| Gene      | logFC     | P-value                | FDR                    |
|-----------|-----------|------------------------|------------------------|
| SSC4D     | -1.035826 | 2.03x10 <sup>-03</sup> | 4.13x10 <sup>-03</sup> |
| ZEB2      | 1.547273  | 1.03x10 <sup>-42</sup> | 1.39x10 <sup>-39</sup> |
| ADCYAP1   | 1.570532  | 1.13x10 <sup>-20</sup> | 1.59x10 <sup>-19</sup> |
| ANO3      | -1.409780 | 1.37x10 <sup>-02</sup> | 2.29x10 <sup>-02</sup> |
| PLA2G5    | 1.201429  | 3.98x10 <sup>-23</sup> | 7.35x10 <sup>-22</sup> |
| NRG4      | -1.078814 | 5.48x10 <sup>-03</sup> | 1.01x10 <sup>-02</sup> |
| FGF2      | 1.697589  | 3.66x10 <sup>-26</sup> | 1.00x10 <sup>-24</sup> |
| PTGDS     | 1.786796  | 1.27x10 <sup>-19</sup> | 1.62x10 <sup>-18</sup> |
| LZTS1     | 1.275693  | 9.12x10 <sup>-29</sup> | 3.68x10 <sup>-27</sup> |
| SIGLEC5   | 1.344242  | 1.48x10 <sup>-20</sup> | 2.05x10 <sup>-19</sup> |
| PTCH2     | 1.691746  | 2.33x10 <sup>-23</sup> | 4.40x10 <sup>-22</sup> |
| DDN       | -1.178001 | 1.66x10 <sup>-03</sup> | 3.45x10 <sup>-03</sup> |
| ADAMTS1   | 1.548496  | 1.22x10 <sup>-28</sup> | 4.79x10 <sup>-27</sup> |
| SLC8A2    | 1.179918  | 1.95x10 <sup>-05</sup> | 6.03x10 <sup>-05</sup> |
| C10orf99  | -1.779415 | 1.70x10 <sup>-02</sup> | 2.78x10 <sup>-02</sup> |
| KCNB1     | 2.600579  | 1.23x10 <sup>-18</sup> | 1.43x10 <sup>-17</sup> |
| SH2D3C    | 1.078764  | 1.17x10 <sup>-29</sup> | 5.40x10 <sup>-28</sup> |
| SERPINB13 | -3.104527 | 7.71x10 <sup>-03</sup> | 1.37x10 <sup>-02</sup> |
| GLP2R     | 2.034496  | 4.62x10 <sup>-21</sup> | 6.75x10 <sup>-20</sup> |
| EPHA7     | 2.088573  | 7.73x10 <sup>-19</sup> | 9.15x10 <sup>-18</sup> |
| PBX3      | 1.083666  | 7.56x10 <sup>-23</sup> | 1.34x10 <sup>-21</sup> |
| CNGA3     | 1.806815  | 5.52x10 <sup>-17</sup> | 5.59x10 <sup>-16</sup> |
| ELANE     | 6.372447  | 8.12x10 <sup>-16</sup> | 7.43x10 <sup>-15</sup> |
| PLPP4     | 1.439956  | 2.24x10 <sup>-11</sup> | 1.42x10 <sup>-10</sup> |
| NMRK2     | 1.167881  | 1.41x10 <sup>-03</sup> | 2.97x10 <sup>-03</sup> |
| ARHGEF26  | 1.333760  | 9.77x10 <sup>-06</sup> | 3.18x10 <sup>-05</sup> |
| CD1C      | 1.682793  | 1.01x10 <sup>-18</sup> | 1.18x10 <sup>-17</sup> |
| BHLHE22   | 2.041711  | 2.81x10 <sup>-38</sup> | 8.55x10 <sup>-36</sup> |
| DOCK10    | 1.351211  | 3.67x10 <sup>-27</sup> | 1.16x10 <sup>-25</sup> |
| USH1G     | -1.839157 | 1.76x10 <sup>-04</sup> | 4.53x10 <sup>-04</sup> |
| GPR183    | 1.427531  | 3.19x10 <sup>-28</sup> | 1.19x10 <sup>-26</sup> |
| ABCA6     | 1.700753  | 1.01x10 <sup>-26</sup> | 2.99x10 <sup>-25</sup> |
| EN2       | -1.374821 | 1.27x10 <sup>-02</sup> | 2.14x10 <sup>-02</sup> |
| PIRT      | 1.240738  | 1.84x10 <sup>-07</sup> | 7.75x10 <sup>-07</sup> |
| TGM3      | -5.056067 | 1.95x10 <sup>-03</sup> | 3.98x10 <sup>-03</sup> |
| CADM2     | 1.577143  | 2.30x10 <sup>-08</sup> | 1.09x10 <sup>-07</sup> |
| GRPR      | 1.733449  | 1.07x10 <sup>-14</sup> | 8.92x10 <sup>-14</sup> |
| TMOD1     | 1.764421  | 1.63x10 <sup>-16</sup> | 1.58x10 <sup>-15</sup> |
| CLEC2D    | 1.057926  | 6.50x10 <sup>-15</sup> | 5.50x10 <sup>-14</sup> |
| COLEC12   | 1.713229  | 3.45x10 <sup>-31</sup> | 2.03x10 <sup>-29</sup> |
| KCNQ5     | 1.285394  | 8.27x10 <sup>-15</sup> | 6.96x10 <sup>-14</sup> |
| RANBP3L   | 1.176230  | 4.92x10 <sup>-13</sup> | 3.56x10 <sup>-12</sup> |
| CACNA1C   | 1.473769  | 7.55x10 <sup>-18</sup> | 8.25x10 <sup>-17</sup> |
| HLA-DQA2  | 1.240751  | 2.98x10 <sup>-08</sup> | 1.39x10 <sup>-07</sup> |
| ANKRD44   | 1.138078  | 5.06x10 <sup>-23</sup> | 9.16x10 <sup>-22</sup> |
| CCR4      | 1.652175  | 1.01x10 <sup>-23</sup> | 2.04x10 <sup>-22</sup> |
| SPP1      | 1.085396  | 6.16x10 <sup>-04</sup> | 1.41x10 <sup>-03</sup> |
| GZMH      | 1.249394  | 2.73x10 <sup>-13</sup> | 2.01x10 <sup>-12</sup> |
| CIDEA     | 1.558391  | 1.43x10 <sup>-02</sup> | 2.38x10 <sup>-02</sup> |
| NAP1L2    | 1.332477  | 2.97x10 <sup>-20</sup> | 4.01x10 <sup>-19</sup> |
| PDE1A     | 1.775599  | 5.47x10 <sup>-35</sup> | 6.53x10 <sup>-33</sup> |
| PRSS56    | -3.387969 | 8.82x10 <sup>-03</sup> | 1.55x10 <sup>-02</sup> |
| SRGN      | 1.367023  | 2.60x10 <sup>-27</sup> | 8.38x10 <sup>-26</sup> |
| MUC21     | -4.452713 | 3.32x10 <sup>-04</sup> | 8.04x10 <sup>-04</sup> |
| EPHA3     | 2.138254  | 1.33x10 <sup>-27</sup> | 4.46x10 <sup>-26</sup> |
| TCF4      | 1.105133  | 2.40x10 <sup>-32</sup> | 1.74x10 <sup>-30</sup> |
| ST8SIA1   | 1.116665  | 4.01x10 <sup>-25</sup> | 9.51x10 <sup>-24</sup> |
| MSC       | 1.264493  | 8.55x10 <sup>-34</sup> | 7.84x10 <sup>-32</sup> |
| SORCS1    | 2.226036  | 3.54x10 <sup>-18</sup> | 3.95x10 <sup>-17</sup> |

Table SII. Continued.

| Gene     | logFC     | P-value                | FDR                    |
|----------|-----------|------------------------|------------------------|
| SPRR2F   | -3.278233 | 2.58x10 <sup>-02</sup> | 4.05x10 <sup>-02</sup> |
| NRXN2    | 2.006279  | 6.28x10 <sup>-24</sup> | 1.30x10 <sup>-22</sup> |
| NRXN3    | 2.242216  | 7.00x10 <sup>-22</sup> | 1.11x10 <sup>-20</sup> |
| FLT3     | 1.313277  | 9.74x10 <sup>-16</sup> | 8.85x10 <sup>-15</sup> |
| F13A1    | 2.175568  | 2.76x10 <sup>-24</sup> | 5.86x10 <sup>-23</sup> |
| SSBP2    | 1.108790  | 1.42x10 <sup>-17</sup> | 1.51x10 <sup>-16</sup> |
| COL1A2   | 1.533517  | 5.66x10 <sup>-31</sup> | 3.24x10 <sup>-29</sup> |
| LRFN5    | 1.395239  | 4.39x10 <sup>-22</sup> | 7.08x10 <sup>-21</sup> |
| FHL1     | 2.600716  | 9.42x10 <sup>-28</sup> | 3.20x10 <sup>-26</sup> |
| DKK2     | 1.263139  | 2.75x10 <sup>-20</sup> | 3.72x10 <sup>-19</sup> |
| COX7A1   | 1.359085  | 4.47x10 <sup>-28</sup> | 1.61x10 <sup>-26</sup> |
| TFPI2    | 1.179403  | 3.71x10 <sup>-09</sup> | 1.92x10 <sup>-08</sup> |
| NR4A3    | 1.269838  | 3.54x10 <sup>-16</sup> | 3.35x10 <sup>-15</sup> |
| ZEB1     | 1.624362  | 1.17x10 <sup>-34</sup> | 1.28x10 <sup>-32</sup> |
| MRLN     | -2.235815 | 2.16x10 <sup>-03</sup> | 4.36x10 <sup>-03</sup> |
| ARHGAP20 | 1.706190  | 2.40x10 <sup>-33</sup> | 1.99x10 <sup>-31</sup> |
| PPP1R14A | 1.478037  | 1.18x10 <sup>-13</sup> | 8.89x10 <sup>-13</sup> |
| MEOX2    | 2.469433  | 5.94x10 <sup>-35</sup> | 6.96x10 <sup>-33</sup> |
| ALDH3B2  | -1.244149 | 2.73x10 <sup>-02</sup> | 4.25x10 <sup>-02</sup> |
| CLEC3B   | 1.450129  | 3.91x10 <sup>-16</sup> | 3.69x10 <sup>-15</sup> |
| PIK3R6   | 1.051966  | 1.76x10 <sup>-26</sup> | 5.03x10 <sup>-25</sup> |
| LMO1     | 3.356503  | 2.00x10 <sup>-10</sup> | 1.16x10 <sup>-09</sup> |
| KCNT2    | 1.350631  | 1.12x10 <sup>-20</sup> | 1.58x10 <sup>-19</sup> |
| CTSV     | -1.167711 | 1.87x10 <sup>-02</sup> | 3.03x10 <sup>-02</sup> |
| FBLN2    | 1.799699  | 3.93x10 <sup>-32</sup> | 2.73x10 <sup>-30</sup> |
| PRR20G   | -2.059484 | 1.20x10 <sup>-02</sup> | 2.04x10 <sup>-02</sup> |
| SORBS1   | 2.212569  | 5.51x10 <sup>-17</sup> | 5.58x10 <sup>-16</sup> |
| CFL2     | 1.711462  | 2.63x10 <sup>-23</sup> | 4.94x10 <sup>-22</sup> |
| PLIN4    | 2.834739  | 2.54x10 <sup>-15</sup> | 2.23x10 <sup>-14</sup> |
| CNN1     | 3.483773  | 4.81x10 <sup>-28</sup> | 1.73x10 <sup>-26</sup> |
| RAB23    | 1.537979  | 1.05x10 <sup>-23</sup> | 2.10x10 <sup>-22</sup> |
| KRT78    | -4.588626 | 6.45x10 <sup>-05</sup> | 1.80x10 <sup>-04</sup> |
| FCRLB    | 1.202876  | 7.06x10 <sup>-06</sup> | 2.37x10 <sup>-05</sup> |
| CCL14    | 1.088288  | 1.86x10 <sup>-15</sup> | 1.64x10 <sup>-14</sup> |
| IGF1     | 2.374822  | 7.39x10 <sup>-31</sup> | 4.18x10 <sup>-29</sup> |
| RASSF2   | 1.540566  | 7.55x10 <sup>-30</sup> | 3.56x10 <sup>-28</sup> |
| HSPB7    | 3.023354  | 1.61x10 <sup>-27</sup> | 5.36x10 <sup>-26</sup> |
| OMD      | 2.862110  | 4.47x10 <sup>-35</sup> | 5.47x10 <sup>-33</sup> |
| SRL      | 1.015036  | 3.06x10 <sup>-13</sup> | 2.25x10 <sup>-12</sup> |
| VCAN     | 1.442501  | 2.41x10 <sup>-31</sup> | 1.47x10 <sup>-29</sup> |
| CYP1B1   | 2.499727  | 1.73x10 <sup>-33</sup> | 1.48x10 <sup>-31</sup> |
| ITGAX    | 1.075519  | 1.79x10 <sup>-22</sup> | 3.03x10 <sup>-21</sup> |
| CDC6     | -1.160786 | 1.04x10 <sup>-09</sup> | 5.67x10 <sup>-09</sup> |
| FAM129A  | 1.901310  | 1.25x10 <sup>-25</sup> | 3.18x10 <sup>-24</sup> |
| PCDHGA3  | 1.583196  | 7.70x10 <sup>-22</sup> | 1.21x10 <sup>-20</sup> |
| COL1A1   | 1.433477  | 7.26x10 <sup>-24</sup> | 1.49x10 <sup>-22</sup> |
| SERPING1 | 1.619538  | 1.38x10 <sup>-41</sup> | 1.04x10 <sup>-38</sup> |
| HSPB6    | 3.371855  | 6.10x10 <sup>-26</sup> | 1.61x10 <sup>-24</sup> |
| CPZ      | 1.435071  | 3.71x10 <sup>-27</sup> | 1.17x10 <sup>-25</sup> |
| PRICKLE1 | 1.313689  | 1.87x10 <sup>-23</sup> | 3.59x10 <sup>-22</sup> |
| NCAM1    | 1.210897  | 1.19x10 <sup>-20</sup> | 1.67x10 <sup>-19</sup> |
| ADH1A    | 1.769337  | 8.38x10 <sup>-04</sup> | 1.86x10 <sup>-03</sup> |
| ITIH5    | 1.705749  | 6.29x10 <sup>-23</sup> | 1.12x10 <sup>-21</sup> |
| GZMB     | 1.087999  | 6.51x10 <sup>-07</sup> | 2.56x10 <sup>-06</sup> |
| COL11A1  | 1.447872  | 1.00x10 <sup>-10</sup> | 5.99x10 <sup>-10</sup> |
| MPO      | 5.403332  | 4.03x10 <sup>-10</sup> | 2.29x10 <sup>-09</sup> |
| RBFOX3   | 2.268245  | 4.42x10 <sup>-05</sup> | 1.28x10 <sup>-04</sup> |
| CLEC4E   | 1.436075  | 1.96x10 <sup>-15</sup> | 1.73x10 <sup>-14</sup> |
| ARHGDIIB | 1.107917  | 6.46x10 <sup>-26</sup> | 1.70x10 <sup>-24</sup> |

Table SII. Continued.

| Gene     | logFC     | P-value                | FDR                    |
|----------|-----------|------------------------|------------------------|
| GHR      | 1.822844  | 3.73x10 <sup>-29</sup> | 1.58x10 <sup>-27</sup> |
| SSPN     | 1.132956  | 1.33x10 <sup>-22</sup> | 2.27x10 <sup>-21</sup> |
| OSCAR    | 1.034075  | 3.91x10 <sup>-18</sup> | 4.35x10 <sup>-17</sup> |
| PHOX2A   | 2.461111  | 5.52x10 <sup>-08</sup> | 2.49x10 <sup>-07</sup> |
| CEACAM4  | 1.428215  | 5.17x10 <sup>-21</sup> | 7.52x10 <sup>-20</sup> |
| CALY     | 1.130202  | 1.05x10 <sup>-05</sup> | 3.40x10 <sup>-05</sup> |
| VNN3     | -1.058636 | 3.83x10 <sup>-03</sup> | 7.30x10 <sup>-03</sup> |
| GMFG     | 1.026265  | 7.87x10 <sup>-26</sup> | 2.05x10 <sup>-24</sup> |
| RAMP3    | 1.073165  | 9.57x10 <sup>-24</sup> | 1.94x10 <sup>-22</sup> |
| CLEC1A   | 1.034946  | 3.54x10 <sup>-26</sup> | 9.68x10 <sup>-25</sup> |
| IRF4     | 1.065942  | 5.69x10 <sup>-14</sup> | 4.40x10 <sup>-13</sup> |
| MSN      | 1.093069  | 4.12x10 <sup>-35</sup> | 5.08x10 <sup>-33</sup> |
| OLFML3   | 1.550117  | 4.91x10 <sup>-35</sup> | 5.96x10 <sup>-33</sup> |
| SMOC2    | 1.893340  | 1.78x10 <sup>-24</sup> | 3.88x10 <sup>-23</sup> |
| WNT3A    | -1.151292 | 1.44x10 <sup>-02</sup> | 2.40x10 <sup>-02</sup> |
| HVCN1    | 1.141597  | 1.09x10 <sup>-27</sup> | 3.66x10 <sup>-26</sup> |
| RHOH     | 1.273417  | 6.70x10 <sup>-21</sup> | 9.64x10 <sup>-20</sup> |
| ASPA     | 1.186047  | 1.47x10 <sup>-19</sup> | 1.85x10 <sup>-18</sup> |
| MS4A14   | 1.078645  | 4.13x10 <sup>-20</sup> | 5.50x10 <sup>-19</sup> |
| TNS1     | 2.221994  | 1.30x10 <sup>-30</sup> | 7.15x10 <sup>-29</sup> |
| BOC      | 2.450199  | 1.73x10 <sup>-35</sup> | 2.29x10 <sup>-33</sup> |
| SLIT3    | 1.868013  | 2.50x10 <sup>-28</sup> | 9.45x10 <sup>-27</sup> |
| ADAMTSL1 | 1.267311  | 1.00x10 <sup>-22</sup> | 1.74x10 <sup>-21</sup> |
| IFNG     | 1.039938  | 2.79x10 <sup>-04</sup> | 6.89x10 <sup>-04</sup> |
| COL5A1   | 1.408912  | 6.11x10 <sup>-30</sup> | 2.95x10 <sup>-28</sup> |
| COL6A1   | 1.026726  | 1.25x10 <sup>-25</sup> | 3.18x10 <sup>-24</sup> |
| IKZF1    | 1.468981  | 4.69x10 <sup>-23</sup> | 8.57x10 <sup>-22</sup> |
| PMCH     | 1.026215  | 7.35x10 <sup>-03</sup> | 1.31x10 <sup>-02</sup> |
| RUNX1T1  | 1.560156  | 6.94x10 <sup>-32</sup> | 4.58x10 <sup>-30</sup> |
| CD33     | 1.528278  | 4.01x10 <sup>-28</sup> | 1.46x10 <sup>-26</sup> |
| CRISPLD1 | 1.320766  | 3.24x10 <sup>-19</sup> | 4.00x10 <sup>-18</sup> |
| PLEKHO1  | 1.447681  | 1.06x10 <sup>-37</sup> | 2.66x10 <sup>-35</sup> |
| CCR2     | 1.722590  | 1.31x10 <sup>-25</sup> | 3.31x10 <sup>-24</sup> |
| PDE2A    | 1.394433  | 1.40x10 <sup>-21</sup> | 2.15x10 <sup>-20</sup> |
| FAT4     | 1.535031  | 3.98x10 <sup>-24</sup> | 8.36x10 <sup>-23</sup> |
| IGLL1    | 2.567697  | 1.93x10 <sup>-08</sup> | 9.25x10 <sup>-08</sup> |
| FRZB     | 1.767413  | 5.55x10 <sup>-27</sup> | 1.69x10 <sup>-25</sup> |
| SLC5A7   | 2.721422  | 5.31x10 <sup>-08</sup> | 2.40x10 <sup>-07</sup> |
| KLK13    | -2.898528 | 3.50x10 <sup>-03</sup> | 6.75x10 <sup>-03</sup> |
| LST1     | 1.159304  | 1.06x10 <sup>-25</sup> | 2.73x10 <sup>-24</sup> |
| GFRA2    | 1.567984  | 5.46x10 <sup>-18</sup> | 6.03x10 <sup>-17</sup> |
| CR2      | 1.400731  | 4.01x10 <sup>-09</sup> | 2.07x10 <sup>-08</sup> |
| ECM2     | 1.506692  | 8.26x10 <sup>-37</sup> | 1.51x10 <sup>-34</sup> |
| MMP16    | 1.420333  | 7.82x10 <sup>-25</sup> | 1.79x10 <sup>-23</sup> |
| HS3ST3A1 | 1.067205  | 1.15x10 <sup>-22</sup> | 1.99x10 <sup>-21</sup> |
| LAYN     | 1.717734  | 1.21x10 <sup>-39</sup> | 5.08x10 <sup>-37</sup> |
| ZNF471   | 1.071004  | 2.52x10 <sup>-22</sup> | 4.17x10 <sup>-21</sup> |
| LILRB2   | 1.215289  | 1.02x10 <sup>-22</sup> | 1.77x10 <sup>-21</sup> |
| GNG2     | 1.226345  | 3.07x10 <sup>-31</sup> | 1.82x10 <sup>-29</sup> |
| NEBL     | -1.102811 | 6.77x10 <sup>-05</sup> | 1.88x10 <sup>-04</sup> |
| ENTPD8   | -1.877829 | 2.56x10 <sup>-14</sup> | 2.05x10 <sup>-13</sup> |
| GLIS1    | 1.092187  | 2.63x10 <sup>-14</sup> | 2.10x10 <sup>-13</sup> |
| SIGLEC8  | 1.672832  | 2.09x10 <sup>-18</sup> | 2.39x10 <sup>-17</sup> |
| MRGPRF   | 2.574052  | 1.51x10 <sup>-35</sup> | 2.03x10 <sup>-33</sup> |
| DNAJB5   | 2.036216  | 1.77x10 <sup>-30</sup> | 9.39x10 <sup>-29</sup> |
| NPR3     | 1.404266  | 2.10x10 <sup>-14</sup> | 1.69x10 <sup>-13</sup> |
| IL2RB    | 1.041836  | 1.52x10 <sup>-14</sup> | 1.24x10 <sup>-13</sup> |
| MUC3A    | -1.010272 | 4.35x10 <sup>-04</sup> | 1.03x10 <sup>-03</sup> |
| OCA2     | -1.223268 | 1.56x10 <sup>-02</sup> | 2.58x10 <sup>-02</sup> |



Table SII. Continued.

| Gene     | logFC     | P-value                | FDR                    |
|----------|-----------|------------------------|------------------------|
| GALNT15  | 1.680270  | 1.06x10 <sup>-24</sup> | 2.38x10 <sup>-23</sup> |
| FILIP1   | 2.079859  | 3.22x10 <sup>-26</sup> | 8.89x10 <sup>-25</sup> |
| CDH11    | 1.690459  | 1.94x10 <sup>-43</sup> | 6.95x10 <sup>-40</sup> |
| RETN     | 1.545515  | 6.85x10 <sup>-08</sup> | 3.06x10 <sup>-07</sup> |
| BIN2     | 1.080822  | 2.99x10 <sup>-22</sup> | 4.90x10 <sup>-21</sup> |
| ADIPOQ   | 2.626537  | 5.02x10 <sup>-06</sup> | 1.73x10 <sup>-05</sup> |
| C1QB     | 1.383857  | 3.64x10 <sup>-21</sup> | 5.37x10 <sup>-20</sup> |
| NTNG2    | 1.172874  | 7.69x10 <sup>-34</sup> | 7.14x10 <sup>-32</sup> |
| CLEC4G   | 1.489471  | 5.16x10 <sup>-15</sup> | 4.40x10 <sup>-14</sup> |
| LOX      | 1.377864  | 7.97x10 <sup>-28</sup> | 2.75x10 <sup>-26</sup> |
| SIT1     | 1.385408  | 6.15x10 <sup>-17</sup> | 6.20x10 <sup>-16</sup> |
| NCS1     | 1.330839  | 1.39x10 <sup>-11</sup> | 8.93x10 <sup>-11</sup> |
| CSPG4    | 1.354373  | 8.27x10 <sup>-15</sup> | 6.96x10 <sup>-14</sup> |
| SCN7A    | 2.942718  | 8.04x10 <sup>-22</sup> | 1.26x10 <sup>-20</sup> |
| TAGLN    | 2.627727  | 5.70x10 <sup>-36</sup> | 8.33x10 <sup>-34</sup> |
| COL4A6   | 1.004373  | 3.41x10 <sup>-06</sup> | 1.21x10 <sup>-05</sup> |
| PYGM     | 2.472403  | 1.13x10 <sup>-23</sup> | 2.25x10 <sup>-22</sup> |
| NR2F1    | 1.277281  | 2.03x10 <sup>-21</sup> | 3.07x10 <sup>-20</sup> |
| BICC1    | 1.794458  | 4.11x10 <sup>-38</sup> | 1.20x10 <sup>-35</sup> |
| ANGPTL7  | 2.499487  | 1.67x10 <sup>-22</sup> | 2.84x10 <sup>-21</sup> |
| HLA-DQB1 | 1.016060  | 1.63x10 <sup>-12</sup> | 1.13x10 <sup>-11</sup> |
| TMEM40   | -2.002645 | 1.65x10 <sup>-02</sup> | 2.70x10 <sup>-02</sup> |
| BMPER    | 1.607101  | 5.57x10 <sup>-19</sup> | 6.73x10 <sup>-18</sup> |
| ACTN2    | 2.937983  | 1.26x10 <sup>-15</sup> | 1.13x10 <sup>-14</sup> |
| CDK15    | 1.017253  | 3.94x10 <sup>-15</sup> | 3.37x10 <sup>-14</sup> |
| GEM      | 1.312473  | 4.01x10 <sup>-25</sup> | 9.51x10 <sup>-24</sup> |
| CBX7     | 1.003682  | 2.35x10 <sup>-15</sup> | 2.06x10 <sup>-14</sup> |
| LILRA6   | 1.030157  | 4.82x10 <sup>-14</sup> | 3.76x10 <sup>-13</sup> |
| CD247    | 1.037752  | 1.56x10 <sup>-14</sup> | 1.27x10 <sup>-13</sup> |
| PAX9     | -1.862291 | 7.62x10 <sup>-06</sup> | 2.54x10 <sup>-05</sup> |
| CLEC2B   | 1.092385  | 6.95x10 <sup>-27</sup> | 2.08x10 <sup>-25</sup> |
| SLC24A3  | 1.217002  | 2.18x10 <sup>-23</sup> | 4.15x10 <sup>-22</sup> |
| SIGLEC1  | 1.423578  | 9.91x10 <sup>-23</sup> | 1.72x10 <sup>-21</sup> |
| COL21A1  | 1.277294  | 4.08x10 <sup>-12</sup> | 2.75x10 <sup>-11</sup> |
| FCER1A   | 2.254863  | 1.78x10 <sup>-17</sup> | 1.88x10 <sup>-16</sup> |
| GLRB     | 1.114134  | 3.69x10 <sup>-19</sup> | 4.52x10 <sup>-18</sup> |
| SCGB2A1  | -1.447584 | 4.95x10 <sup>-04</sup> | 1.16x10 <sup>-03</sup> |
| LY9      | 1.395347  | 8.32x10 <sup>-19</sup> | 9.79x10 <sup>-18</sup> |
| ADGRF1   | -1.679550 | 1.24x10 <sup>-04</sup> | 3.27x10 <sup>-04</sup> |
| SP9      | -2.749142 | 4.08x10 <sup>-03</sup> | 7.72x10 <sup>-03</sup> |
| GYPE     | 1.657443  | 9.45x10 <sup>-40</sup> | 4.22x10 <sup>-37</sup> |
| LIX1L    | 1.091024  | 3.53x10 <sup>-25</sup> | 8.49x10 <sup>-24</sup> |
| CRNN     | -5.012687 | 3.44x10 <sup>-04</sup> | 8.32x10 <sup>-04</sup> |
| JAM2     | 1.838299  | 2.03x10 <sup>-32</sup> | 1.48x10 <sup>-30</sup> |
| IL24     | 1.038672  | 3.99x10 <sup>-09</sup> | 2.06x10 <sup>-08</sup> |
| ATP1A2   | 3.188050  | 1.33x10 <sup>-24</sup> | 2.95x10 <sup>-23</sup> |
| TIMP3    | 1.841386  | 1.53x10 <sup>-34</sup> | 1.64x10 <sup>-32</sup> |
| CALHM3   | -1.192887 | 2.60x10 <sup>-03</sup> | 5.16x10 <sup>-03</sup> |
| TLL1     | 1.688485  | 4.87x10 <sup>-28</sup> | 1.74x10 <sup>-26</sup> |
| CLEC5A   | 1.220091  | 4.72x10 <sup>-12</sup> | 3.17x10 <sup>-11</sup> |
| HEG1     | 1.358926  | 4.80x10 <sup>-39</sup> | 1.81x10 <sup>-36</sup> |
| LRRN2    | 1.352370  | 7.77x10 <sup>-19</sup> | 9.18x10 <sup>-18</sup> |
| JPH2     | 2.694678  | 4.62x10 <sup>-21</sup> | 6.75x10 <sup>-20</sup> |
| NOVA1    | 1.187598  | 5.81x10 <sup>-16</sup> | 5.39x10 <sup>-15</sup> |
| PTPN7    | 1.046129  | 7.73x10 <sup>-16</sup> | 7.10x10 <sup>-15</sup> |
| FXFD6    | 1.770488  | 2.37x10 <sup>-33</sup> | 1.97x10 <sup>-31</sup> |
| LGALS7B  | -1.144393 | 1.01x10 <sup>-04</sup> | 2.71x10 <sup>-04</sup> |
| PHLDB1   | 1.057816  | 4.38x10 <sup>-27</sup> | 1.36x10 <sup>-25</sup> |
| NTM      | 1.409583  | 4.74x10 <sup>-23</sup> | 8.62x10 <sup>-22</sup> |

Table SII. Continued.

| Gene     | logFC     | P-value                | FDR                    |
|----------|-----------|------------------------|------------------------|
| CD200    | 1.243185  | 8.55x10 <sup>-35</sup> | 9.56x10 <sup>-33</sup> |
| KERA     | 3.055449  | 1.22x10 <sup>-28</sup> | 4.79x10 <sup>-27</sup> |
| CYTH4    | 1.200129  | 1.78x10 <sup>-25</sup> | 4.42x10 <sup>-24</sup> |
| MS4A1    | 1.531080  | 1.48x10 <sup>-15</sup> | 1.32x10 <sup>-14</sup> |
| HOXA9    | -1.051476 | 1.25x10 <sup>-03</sup> | 2.68x10 <sup>-03</sup> |
| KLRC4    | 1.068766  | 3.82x10 <sup>-08</sup> | 1.76x10 <sup>-07</sup> |
| SIGLEC10 | 1.609576  | 6.24x10 <sup>-25</sup> | 1.45x10 <sup>-23</sup> |
| CLEC12A  | 1.380035  | 7.12x10 <sup>-19</sup> | 8.48x10 <sup>-18</sup> |
| GPR15    | 1.338855  | 1.22x10 <sup>-04</sup> | 3.23x10 <sup>-04</sup> |
| QKI      | 1.022018  | 1.43x10 <sup>-31</sup> | 9.03x10 <sup>-30</sup> |
| HCST     | 1.255425  | 3.49x10 <sup>-21</sup> | 5.17x10 <sup>-20</sup> |
| FBLN5    | 1.610721  | 4.76x10 <sup>-34</sup> | 4.60x10 <sup>-32</sup> |
| CD93     | 1.032987  | 7.48x10 <sup>-25</sup> | 1.72x10 <sup>-23</sup> |
| FCRL3    | 1.462219  | 1.48x10 <sup>-14</sup> | 1.21x10 <sup>-13</sup> |
| GREM2    | 1.980385  | 2.64x10 <sup>-15</sup> | 2.30x10 <sup>-14</sup> |
| P2RY10   | 1.520657  | 1.33x10 <sup>-19</sup> | 1.68x10 <sup>-18</sup> |
| MS4A2    | 1.237225  | 1.74x10 <sup>-15</sup> | 1.55x10 <sup>-14</sup> |
| CHRNA3   | 2.782873  | 2.40x10 <sup>-13</sup> | 1.77x10 <sup>-12</sup> |
| PRG4     | 2.449932  | 8.96x10 <sup>-25</sup> | 2.03x10 <sup>-23</sup> |
| LRRC10B  | 1.305286  | 1.79x10 <sup>-07</sup> | 7.54x10 <sup>-07</sup> |
| PRKG1    | 1.430829  | 8.13x10 <sup>-30</sup> | 3.82x10 <sup>-28</sup> |
| NKX2-8   | -1.410713 | 6.39x10 <sup>-03</sup> | 1.16x10 <sup>-02</sup> |
| MAPK10   | 1.912879  | 8.15x10 <sup>-33</sup> | 6.27x10 <sup>-31</sup> |
| MYOM1    | 1.150179  | 1.62x10 <sup>-06</sup> | 6.02x10 <sup>-06</sup> |
| PLN      | 2.811133  | 1.08x10 <sup>-30</sup> | 5.94x10 <sup>-29</sup> |
| SERTM2   | 3.167372  | 7.68x10 <sup>-22</sup> | 1.21x10 <sup>-20</sup> |
| RGL3     | -1.197899 | 2.63x10 <sup>-05</sup> | 7.96x10 <sup>-05</sup> |
| SLC18A3  | 2.164369  | 1.70x10 <sup>-14</sup> | 1.38x10 <sup>-13</sup> |
| CTGF     | 1.296417  | 7.55x10 <sup>-30</sup> | 3.56x10 <sup>-28</sup> |
| CCL5     | 1.107619  | 6.24x10 <sup>-14</sup> | 4.81x10 <sup>-13</sup> |
| DAAM2    | 1.560936  | 1.93x10 <sup>-24</sup> | 4.16x10 <sup>-23</sup> |
| FAM198A  | 1.669894  | 4.21x10 <sup>-22</sup> | 6.80x10 <sup>-21</sup> |
| IGFL4    | -1.339490 | 1.06x10 <sup>-02</sup> | 1.83x10 <sup>-02</sup> |
| FCN1     | 1.855597  | 3.15x10 <sup>-25</sup> | 7.64x10 <sup>-24</sup> |
| TNFSF8   | 1.614259  | 6.03x10 <sup>-27</sup> | 1.82x10 <sup>-25</sup> |
| ST6GAL2  | 1.215123  | 4.96x10 <sup>-20</sup> | 6.56x10 <sup>-19</sup> |
| MARCH1   | 1.061145  | 4.96x10 <sup>-21</sup> | 7.23x10 <sup>-20</sup> |
| COL8A2   | 1.713269  | 3.50x10 <sup>-35</sup> | 4.39x10 <sup>-33</sup> |
| CMKLR1   | 1.239718  | 3.39x10 <sup>-30</sup> | 1.73x10 <sup>-28</sup> |
| PDE3A    | 1.434235  | 1.31x10 <sup>-24</sup> | 2.92x10 <sup>-23</sup> |
| PCDHB7   | 1.024348  | 1.01x10 <sup>-21</sup> | 1.57x10 <sup>-20</sup> |
| MYO1G    | 1.294867  | 4.63x10 <sup>-22</sup> | 7.45x10 <sup>-21</sup> |
| CD28     | 1.257099  | 7.20x10 <sup>-21</sup> | 1.03x10 <sup>-19</sup> |
| ADGRE1   | 1.319680  | 4.52x10 <sup>-15</sup> | 3.86x10 <sup>-14</sup> |
| THRSP    | 1.725861  | 4.87x10 <sup>-05</sup> | 1.40x10 <sup>-04</sup> |
| IGSF21   | 1.164697  | 1.28x10 <sup>-14</sup> | 1.05x10 <sup>-13</sup> |
| PROM2    | -1.129685 | 1.08x10 <sup>-06</sup> | 4.11x10 <sup>-06</sup> |
| SPIC     | 1.167037  | 6.38x10 <sup>-04</sup> | 1.46x10 <sup>-03</sup> |
| HLF      | 1.498061  | 9.07x10 <sup>-08</sup> | 3.98x10 <sup>-07</sup> |
| MS4A4A   | 1.540188  | 8.36x10 <sup>-28</sup> | 2.88x10 <sup>-26</sup> |
| PRAM1    | 1.268032  | 1.16x10 <sup>-28</sup> | 4.61x10 <sup>-27</sup> |
| MAB21L2  | 1.974814  | 1.08x10 <sup>-10</sup> | 6.41x10 <sup>-10</sup> |
| MEFV     | 1.059761  | 1.41x10 <sup>-12</sup> | 9.88x10 <sup>-12</sup> |
| TESPA1   | 1.375491  | 2.29x10 <sup>-22</sup> | 3.82x10 <sup>-21</sup> |
| PDZRN4   | 3.244755  | 9.04x10 <sup>-33</sup> | 6.88x10 <sup>-31</sup> |
| ARHGAP25 | 1.179963  | 3.26x10 <sup>-24</sup> | 6.86x10 <sup>-23</sup> |
| GALNT16  | 1.307351  | 7.75x10 <sup>-17</sup> | 7.74x10 <sup>-16</sup> |
| SYNPO    | 1.040229  | 4.44x10 <sup>-20</sup> | 5.90x10 <sup>-19</sup> |
| FIBIN    | 1.832206  | 5.60x10 <sup>-41</sup> | 3.21x10 <sup>-38</sup> |

Table SII. Continued.

| Gene     | logFC     | P-value                | FDR                    |
|----------|-----------|------------------------|------------------------|
| CD48     | 1.397237  | 7.98x10 <sup>-23</sup> | 1.40x10 <sup>-21</sup> |
| ATP1B2   | 1.296802  | 4.53x10 <sup>-19</sup> | 5.51x10 <sup>-18</sup> |
| NTRK1    | 1.248352  | 3.14x10 <sup>-20</sup> | 4.23x10 <sup>-19</sup> |
| MAFB     | 1.374526  | 5.14x10 <sup>-37</sup> | 1.02x10 <sup>-34</sup> |
| SCUBE1   | 1.136035  | 7.61x10 <sup>-09</sup> | 3.83x10 <sup>-08</sup> |
| FXYP1    | 1.756881  | 1.65x10 <sup>-20</sup> | 2.28x10 <sup>-19</sup> |
| LGALS1   | 1.080225  | 3.51x10 <sup>-28</sup> | 1.30x10 <sup>-26</sup> |
| OPRL1    | 1.061012  | 1.12x10 <sup>-14</sup> | 9.26x10 <sup>-14</sup> |
| ADAMTSL3 | 2.054731  | 1.27x10 <sup>-27</sup> | 4.27x10 <sup>-26</sup> |
| ORM2     | -1.265921 | 1.99x10 <sup>-02</sup> | 3.20x10 <sup>-02</sup> |
| SAMSN1   | 1.128590  | 1.12x10 <sup>-23</sup> | 2.23x10 <sup>-22</sup> |
| RBMS3    | 1.700310  | 1.84x10 <sup>-31</sup> | 1.14x10 <sup>-29</sup> |
| HOXA4    | 1.017510  | 8.21x10 <sup>-11</sup> | 4.93x10 <sup>-10</sup> |
| ABCA9    | 2.031632  | 2.00x10 <sup>-26</sup> | 5.68x10 <sup>-25</sup> |
| CYR61    | 1.313479  | 9.32x10 <sup>-21</sup> | 1.32x10 <sup>-19</sup> |
| PRRX1    | 1.739976  | 2.99x10 <sup>-36</sup> | 4.70x10 <sup>-34</sup> |
| CCR7     | 1.641101  | 4.81x10 <sup>-20</sup> | 6.37x10 <sup>-19</sup> |
| GPRASP1  | 1.811367  | 1.43x10 <sup>-25</sup> | 3.61x10 <sup>-24</sup> |
| LMO3     | 1.578754  | 1.80x10 <sup>-17</sup> | 1.90x10 <sup>-16</sup> |
| SOD3     | 1.538411  | 1.56x10 <sup>-28</sup> | 6.00x10 <sup>-27</sup> |
| AEBP1    | 1.669103  | 2.24x10 <sup>-36</sup> | 3.72x10 <sup>-34</sup> |
| CARTPT   | 4.445904  | 4.01x10 <sup>-13</sup> | 2.92x10 <sup>-12</sup> |
| EPHA6    | 1.845257  | 2.31x10 <sup>-12</sup> | 1.59x10 <sup>-11</sup> |
| APCDD1L  | 1.224516  | 1.04x10 <sup>-19</sup> | 1.34x10 <sup>-18</sup> |
| VEGFD    | 2.629351  | 1.70x10 <sup>-14</sup> | 1.37x10 <sup>-13</sup> |
| PDPN     | 1.258568  | 1.79x10 <sup>-30</sup> | 9.44x10 <sup>-29</sup> |
| BPI      | 2.132786  | 1.02x10 <sup>-17</sup> | 1.10x10 <sup>-16</sup> |
| NFASC    | 1.782083  | 3.77x10 <sup>-20</sup> | 5.04x10 <sup>-19</sup> |
| RBPM3    | 2.211929  | 3.45x10 <sup>-18</sup> | 3.86x10 <sup>-17</sup> |
| RGS18    | 1.326506  | 2.34x10 <sup>-22</sup> | 3.89x10 <sup>-21</sup> |
| CR1      | 1.530276  | 9.53x10 <sup>-20</sup> | 1.23x10 <sup>-18</sup> |
| SLA      | 1.486402  | 8.79x10 <sup>-27</sup> | 2.60x10 <sup>-25</sup> |
| VIM      | 1.138392  | 1.53x10 <sup>-43</sup> | 6.95x10 <sup>-40</sup> |
| RNASE3   | 2.608801  | 2.22x10 <sup>-10</sup> | 1.28x10 <sup>-09</sup> |
| HSPB2    | 1.627826  | 1.07x10 <sup>-30</sup> | 5.89x10 <sup>-29</sup> |
| ZNF423   | 1.508576  | 9.83x10 <sup>-32</sup> | 6.42x10 <sup>-30</sup> |
| CMTM3    | 1.104246  | 7.15x10 <sup>-33</sup> | 5.56x10 <sup>-31</sup> |
| ENOX1    | 1.324084  | 3.00x10 <sup>-32</sup> | 2.13x10 <sup>-30</sup> |
| AOC3     | 2.420459  | 2.11x10 <sup>-38</sup> | 6.72x10 <sup>-36</sup> |
| RFTN1    | 1.381008  | 6.68x10 <sup>-41</sup> | 3.68x10 <sup>-38</sup> |
| SAMD4A   | 1.140633  | 7.57x10 <sup>-20</sup> | 9.85x10 <sup>-19</sup> |
| PPP1R12B | 2.263149  | 7.89x10 <sup>-17</sup> | 7.87x10 <sup>-16</sup> |
| HTR2B    | 1.121784  | 7.19x10 <sup>-19</sup> | 8.55x10 <sup>-18</sup> |
| SGIP1    | 1.141834  | 8.17x10 <sup>-29</sup> | 3.31x10 <sup>-27</sup> |
| KCNIP1   | 1.382606  | 1.37x10 <sup>-21</sup> | 2.11x10 <sup>-20</sup> |
| CYP7B1   | 1.204925  | 1.06x10 <sup>-23</sup> | 2.12x10 <sup>-22</sup> |
| MYOT     | 1.068902  | 3.48x10 <sup>-08</sup> | 1.61x10 <sup>-07</sup> |
| ABI3BP   | 2.512288  | 3.10x10 <sup>-29</sup> | 1.32x10 <sup>-27</sup> |
| A2M      | 1.503734  | 6.61x10 <sup>-37</sup> | 1.26x10 <sup>-34</sup> |
| DUSP9    | -1.290147 | 2.31x10 <sup>-04</sup> | 5.80x10 <sup>-04</sup> |
| LOXL1    | 1.014039  | 1.44x10 <sup>-24</sup> | 3.18x10 <sup>-23</sup> |
| CHRDL2   | 3.030290  | 4.80x10 <sup>-31</sup> | 2.78x10 <sup>-29</sup> |
| EML1     | 1.600163  | 1.84x10 <sup>-26</sup> | 5.26x10 <sup>-25</sup> |
| CEL      | -3.552914 | 1.20x10 <sup>-02</sup> | 2.04x10 <sup>-02</sup> |
| PLXDC2   | 1.786909  | 6.90x10 <sup>-43</sup> | 1.33x10 <sup>-39</sup> |
| NRROS    | 1.074993  | 2.11x10 <sup>-25</sup> | 5.20x10 <sup>-24</sup> |
| CXCR4    | 1.184306  | 5.77x10 <sup>-23</sup> | 1.03x10 <sup>-21</sup> |
| VSIG4    | 1.492236  | 2.30x10 <sup>-24</sup> | 4.95x10 <sup>-23</sup> |
| WIPF1    | 1.309000  | 3.39x10 <sup>-37</sup> | 7.45x10 <sup>-35</sup> |

Table SII. Continued.

| Gene     | logFC     | P-value                | FDR                    |
|----------|-----------|------------------------|------------------------|
| SMTN     | 1.463613  | 3.83x10 <sup>-13</sup> | 2.79x10 <sup>-12</sup> |
| COL8A1   | 2.161409  | 1.88x10 <sup>-41</sup> | 1.24x10 <sup>-38</sup> |
| SHE      | 1.139059  | 4.03x10 <sup>-27</sup> | 1.26x10 <sup>-25</sup> |
| RAB33A   | 1.178369  | 3.08x10 <sup>-26</sup> | 8.55x10 <sup>-25</sup> |
| SERPINA9 | 4.475983  | 2.72x10 <sup>-05</sup> | 8.20x10 <sup>-05</sup> |
| DTHD1    | 1.235618  | 6.35x10 <sup>-13</sup> | 4.57x10 <sup>-12</sup> |
| DGKB     | 1.243494  | 4.23x10 <sup>-07</sup> | 1.70x10 <sup>-06</sup> |
| REM1     | 1.364057  | 2.57x10 <sup>-31</sup> | 1.55x10 <sup>-29</sup> |
| ZPLD1    | 1.057915  | 8.64x10 <sup>-04</sup> | 1.91x10 <sup>-03</sup> |
| TM6SF1   | 1.439113  | 3.69x10 <sup>-34</sup> | 3.67x10 <sup>-32</sup> |
| NKAPL    | 1.753796  | 6.24x10 <sup>-29</sup> | 2.57x10 <sup>-27</sup> |
| JAM3     | 1.459493  | 1.39x10 <sup>-35</sup> | 1.91x10 <sup>-33</sup> |
| ITGB3    | 1.314109  | 1.20x10 <sup>-21</sup> | 1.85x10 <sup>-20</sup> |
| FAT3     | 2.555848  | 1.75x10 <sup>-23</sup> | 3.38x10 <sup>-22</sup> |
| MNDA     | 1.493313  | 2.33x10 <sup>-28</sup> | 8.81x10 <sup>-27</sup> |
| CD3D     | 1.080086  | 2.80x10 <sup>-15</sup> | 2.44x10 <sup>-14</sup> |
| BCHE     | 2.214548  | 1.52x10 <sup>-19</sup> | 1.92x10 <sup>-18</sup> |
| CLC      | 2.287100  | 1.03x10 <sup>-07</sup> | 4.47x10 <sup>-07</sup> |
| MGP      | 2.452642  | 8.37x10 <sup>-36</sup> | 1.19x10 <sup>-33</sup> |
| RTL3     | 1.816080  | 3.27x10 <sup>-26</sup> | 8.98x10 <sup>-25</sup> |
| DZIP1    | 1.083100  | 1.25x10 <sup>-26</sup> | 3.64x10 <sup>-25</sup> |
| FN1      | 1.456631  | 4.39x10 <sup>-25</sup> | 1.04x10 <sup>-23</sup> |
| PNMT     | -1.462146 | 1.05x10 <sup>-03</sup> | 2.28x10 <sup>-03</sup> |
| CRISP3   | -2.405102 | 1.65x10 <sup>-02</sup> | 2.71x10 <sup>-02</sup> |
| DMD      | 1.708898  | 6.02x10 <sup>-15</sup> | 5.11x10 <sup>-14</sup> |
| FCGR1B   | 1.254808  | 5.04x10 <sup>-22</sup> | 8.09x10 <sup>-21</sup> |
| KIRREL1  | 1.153475  | 1.46x10 <sup>-31</sup> | 9.23x10 <sup>-30</sup> |
| CD96     | 1.130924  | 1.15x10 <sup>-16</sup> | 1.13x10 <sup>-15</sup> |
| HLA-DPB1 | 1.051917  | 1.45x10 <sup>-17</sup> | 1.54x10 <sup>-16</sup> |
| ZNF366   | 1.083977  | 1.87x10 <sup>-22</sup> | 3.14x10 <sup>-21</sup> |
| IL1R1    | 1.250599  | 3.46x10 <sup>-32</sup> | 2.45x10 <sup>-30</sup> |
| BEND6    | 1.353691  | 1.41x10 <sup>-24</sup> | 3.11x10 <sup>-23</sup> |
| ZNF853   | 1.042402  | 9.84x10 <sup>-17</sup> | 9.79x10 <sup>-16</sup> |
| SYNGR4   | -1.604811 | 1.13x10 <sup>-04</sup> | 3.00x10 <sup>-04</sup> |
| KCNK2    | 1.628692  | 1.37x10 <sup>-20</sup> | 1.91x10 <sup>-19</sup> |
| LIMS2    | 2.037874  | 3.99x10 <sup>-30</sup> | 1.99x10 <sup>-28</sup> |
| ADAMDEC1 | 1.296564  | 2.48x10 <sup>-13</sup> | 1.83x10 <sup>-12</sup> |
| ZNF804A  | 1.266704  | 7.55x10 <sup>-19</sup> | 8.94x10 <sup>-18</sup> |
| KRT32    | -2.446739 | 1.66x10 <sup>-02</sup> | 2.72x10 <sup>-02</sup> |
| SERPINB3 | -1.699187 | 6.99x10 <sup>-03</sup> | 1.26x10 <sup>-02</sup> |
| PCOLCE   | 1.400086  | 5.72x10 <sup>-32</sup> | 3.81x10 <sup>-30</sup> |
| TFEC     | 1.191484  | 2.32x10 <sup>-20</sup> | 3.16x10 <sup>-19</sup> |
| FPR3     | 1.478648  | 5.23x10 <sup>-27</sup> | 1.61x10 <sup>-25</sup> |
| EBF1     | 1.467883  | 7.91x10 <sup>-27</sup> | 2.36x10 <sup>-25</sup> |
| TNFSF12  | 1.129167  | 2.78x10 <sup>-30</sup> | 1.42x10 <sup>-28</sup> |
| PAGE1    | -2.150629 | 4.92x10 <sup>-03</sup> | 9.18x10 <sup>-03</sup> |
| PDE1B    | 1.400634  | 1.36x10 <sup>-30</sup> | 7.37x10 <sup>-29</sup> |
| ITPKB    | 1.279054  | 1.45x10 <sup>-18</sup> | 1.68x10 <sup>-17</sup> |
| ACKR1    | 2.016686  | 2.78x10 <sup>-23</sup> | 5.21x10 <sup>-22</sup> |
| SPIB     | 2.343338  | 6.48x10 <sup>-07</sup> | 2.54x10 <sup>-06</sup> |
| EMILIN1  | 1.738029  | 2.78x10 <sup>-39</sup> | 1.14x10 <sup>-36</sup> |
| KRT6B    | -2.306840 | 5.07x10 <sup>-03</sup> | 9.41x10 <sup>-03</sup> |
| LAX1     | 1.397690  | 2.93x10 <sup>-17</sup> | 3.04x10 <sup>-16</sup> |
| FGF7     | 2.138632  | 4.80x10 <sup>-37</sup> | 9.81x10 <sup>-35</sup> |
| SVIL     | 1.486837  | 2.63x10 <sup>-14</sup> | 2.10x10 <sup>-13</sup> |
| KCNMB1   | 2.544607  | 9.69x10 <sup>-29</sup> | 3.86x10 <sup>-27</sup> |
| SMPX     | 1.890521  | 1.72x10 <sup>-08</sup> | 8.31x10 <sup>-08</sup> |
| PLXNA4   | 1.575556  | 3.50x10 <sup>-26</sup> | 9.58x10 <sup>-25</sup> |
| THBS2    | 1.594489  | 5.04x10 <sup>-28</sup> | 1.80x10 <sup>-26</sup> |

Table SII. Continued.

| Gene     | logFC     | P-value                | FDR                    |
|----------|-----------|------------------------|------------------------|
| LGI2     | 1.630190  | 1.18x10 <sup>-28</sup> | 4.64x10 <sup>-27</sup> |
| MFAP5    | 2.274193  | 1.17x10 <sup>-36</sup> | 2.09x10 <sup>-34</sup> |
| VXN      | 1.657517  | 8.62x10 <sup>-12</sup> | 5.66x10 <sup>-11</sup> |
| NACAD    | 1.450190  | 8.57x10 <sup>-19</sup> | 1.01x10 <sup>-17</sup> |
| PDE7B    | 1.636312  | 1.28x10 <sup>-18</sup> | 1.49x10 <sup>-17</sup> |
| TCL1A    | 1.523493  | 4.25x10 <sup>-11</sup> | 2.62x10 <sup>-10</sup> |
| CLEC10A  | 1.824458  | 6.64x10 <sup>-22</sup> | 1.05x10 <sup>-20</sup> |
| TRABD2B  | 1.029319  | 3.98x10 <sup>-17</sup> | 4.08x10 <sup>-16</sup> |
| CTNNA3   | 2.138564  | 1.82x10 <sup>-18</sup> | 2.09x10 <sup>-17</sup> |
| AZU1     | 4.430710  | 6.72x10 <sup>-04</sup> | 1.52x10 <sup>-03</sup> |
| VEGFC    | 1.121333  | 3.94x10 <sup>-38</sup> | 1.18x10 <sup>-35</sup> |
| TRAF3IP3 | 1.299412  | 2.35x10 <sup>-21</sup> | 3.52x10 <sup>-20</sup> |
| DACT1    | 1.335473  | 5.59x10 <sup>-30</sup> | 2.72x10 <sup>-28</sup> |
| NID2     | 1.172682  | 1.54x10 <sup>-28</sup> | 5.94x10 <sup>-27</sup> |
| PADI1    | -2.360914 | 2.25x10 <sup>-02</sup> | 3.58x10 <sup>-02</sup> |
| KCNN3    | 1.747332  | 8.60x10 <sup>-31</sup> | 4.81x10 <sup>-29</sup> |
| LHFPL6   | 1.497658  | 1.82x10 <sup>-36</sup> | 3.21x10 <sup>-34</sup> |
| ATP8B2   | 1.420210  | 1.13x10 <sup>-33</sup> | 9.98x10 <sup>-32</sup> |
| ANKRD18B | -1.165486 | 2.40x10 <sup>-04</sup> | 6.00x10 <sup>-04</sup> |
| MAP1A    | 1.837720  | 3.48x10 <sup>-36</sup> | 5.41x10 <sup>-34</sup> |
| DLG2     | 1.055555  | 2.91x10 <sup>-13</sup> | 2.14x10 <sup>-12</sup> |
| UNC45B   | 1.155664  | 1.35x10 <sup>-11</sup> | 8.68x10 <sup>-11</sup> |
| CALHM5   | 1.298294  | 2.83x10 <sup>-36</sup> | 4.50x10 <sup>-34</sup> |
| IL17C    | -1.493887 | 1.63x10 <sup>-03</sup> | 3.40x10 <sup>-03</sup> |
| LY96     | 1.224275  | 5.53x10 <sup>-30</sup> | 2.71x10 <sup>-28</sup> |
| PRND     | 1.349291  | 1.09x10 <sup>-17</sup> | 1.17x10 <sup>-16</sup> |
| INSYN2B  | 1.268910  | 6.99x10 <sup>-17</sup> | 7.01x10 <sup>-16</sup> |
| DIXDC1   | 1.582215  | 3.24x10 <sup>-23</sup> | 6.03x10 <sup>-22</sup> |
| LRRC26   | -1.176286 | 2.27x10 <sup>-04</sup> | 5.70x10 <sup>-04</sup> |
| TFR2     | -1.026952 | 1.86x10 <sup>-08</sup> | 8.94x10 <sup>-08</sup> |
| TLR10    | 1.729322  | 4.85x10 <sup>-16</sup> | 4.52x10 <sup>-15</sup> |
| FDCSP    | 1.584119  | 2.75x10 <sup>-09</sup> | 1.44x10 <sup>-08</sup> |
| SPN      | 1.143678  | 3.05x10 <sup>-18</sup> | 3.42x10 <sup>-17</sup> |
| ZNF683   | 1.411614  | 1.90x10 <sup>-10</sup> | 1.10x10 <sup>-09</sup> |
| WNT9A    | 1.475070  | 2.76x10 <sup>-11</sup> | 1.73x10 <sup>-10</sup> |
| PTX3     | 1.530561  | 2.16x10 <sup>-16</sup> | 2.07x10 <sup>-15</sup> |
| TMEM47   | 1.546318  | 1.61x10 <sup>-32</sup> | 1.19x10 <sup>-30</sup> |
| TNFAIP6  | 1.335511  | 4.73x10 <sup>-16</sup> | 4.41x10 <sup>-15</sup> |
| CHRM2    | 3.588861  | 2.35x10 <sup>-22</sup> | 3.90x10 <sup>-21</sup> |
| ANO7     | -1.161484 | 1.00x10 <sup>-08</sup> | 4.98x10 <sup>-08</sup> |
| GRAP     | 1.005312  | 3.54x10 <sup>-19</sup> | 4.35x10 <sup>-18</sup> |
| DSE      | 1.014394  | 3.11x10 <sup>-28</sup> | 1.16x10 <sup>-26</sup> |
| ITGA11   | 1.612765  | 1.49x10 <sup>-29</sup> | 6.72x10 <sup>-28</sup> |
| IL9R     | 1.091175  | 3.55x10 <sup>-15</sup> | 3.05x10 <sup>-14</sup> |
| ATOH1    | -1.386509 | 5.31x10 <sup>-03</sup> | 9.82x10 <sup>-03</sup> |
| CADM3    | 2.793044  | 1.79x10 <sup>-27</sup> | 5.90x10 <sup>-26</sup> |
| PTGER1   | 1.344240  | 2.54x10 <sup>-09</sup> | 1.33x10 <sup>-08</sup> |
| MAP4K1   | 1.340802  | 2.17x10 <sup>-15</sup> | 1.91x10 <sup>-14</sup> |
| CILP     | 3.258318  | 5.72x10 <sup>-32</sup> | 3.81x10 <sup>-30</sup> |
| OBP2B    | -4.397443 | 1.12x10 <sup>-03</sup> | 2.42x10 <sup>-03</sup> |
| ITGA9    | 1.472772  | 2.79x10 <sup>-24</sup> | 5.92x10 <sup>-23</sup> |
| GNG11    | 1.132741  | 1.68x10 <sup>-30</sup> | 8.97x10 <sup>-29</sup> |
| PRR36    | -1.828281 | 3.46x10 <sup>-08</sup> | 1.60x10 <sup>-07</sup> |
| NEXMIF   | 1.739450  | 1.64x10 <sup>-18</sup> | 1.89x10 <sup>-17</sup> |
| NKG7     | 1.252857  | 4.21x10 <sup>-14</sup> | 3.30x10 <sup>-13</sup> |
| CCL11    | 1.699468  | 8.28x10 <sup>-25</sup> | 1.88x10 <sup>-23</sup> |
| IL31RA   | 1.620018  | 1.51x10 <sup>-08</sup> | 7.33x10 <sup>-08</sup> |
| MRAS     | 1.132291  | 3.95x10 <sup>-34</sup> | 3.87x10 <sup>-32</sup> |
| RYR3     | 1.632338  | 1.59x10 <sup>-07</sup> | 6.75x10 <sup>-07</sup> |

Table SII. Continued.

| Gene      | logFC     | P-value                | FDR                    |
|-----------|-----------|------------------------|------------------------|
| P2RY12    | 1.825346  | 8.73x10 <sup>-22</sup> | 1.36x10 <sup>-20</sup> |
| CALD1     | 1.965693  | 1.21x10 <sup>-34</sup> | 1.33x10 <sup>-32</sup> |
| DMPK      | 1.185058  | 2.19x10 <sup>-09</sup> | 1.16x10 <sup>-08</sup> |
| RGS7BP    | 1.586143  | 7.31x10 <sup>-22</sup> | 1.15x10 <sup>-20</sup> |
| C1QTNF7   | 2.035576  | 2.29x10 <sup>-22</sup> | 3.82x10 <sup>-21</sup> |
| LAMP5     | 1.373984  | 2.20x10 <sup>-20</sup> | 3.01x10 <sup>-19</sup> |
| HTR2A     | 2.412825  | 4.94x10 <sup>-39</sup> | 1.81x10 <sup>-36</sup> |
| VSTM1     | 1.001556  | 1.68x10 <sup>-07</sup> | 7.13x10 <sup>-07</sup> |
| AZGP1     | -1.133219 | 2.68x10 <sup>-05</sup> | 8.10x10 <sup>-05</sup> |
| ITGA5     | 1.288268  | 3.13x10 <sup>-23</sup> | 5.85x10 <sup>-22</sup> |
| F2RL3     | 1.013886  | 8.88x10 <sup>-13</sup> | 6.30x10 <sup>-12</sup> |
| BLK       | 1.523790  | 1.62x10 <sup>-12</sup> | 1.13x10 <sup>-11</sup> |
| PLPPR4    | 1.789748  | 4.20x10 <sup>-30</sup> | 2.09x10 <sup>-28</sup> |
| SMYD1     | 3.733768  | 1.60x10 <sup>-10</sup> | 9.37x10 <sup>-10</sup> |
| MCEMP1    | 1.229824  | 2.06x10 <sup>-05</sup> | 6.33x10 <sup>-05</sup> |
| PRICKLE2  | 1.802914  | 1.53x10 <sup>-25</sup> | 3.84x10 <sup>-24</sup> |
| S1PR1     | 1.312441  | 1.11x10 <sup>-29</sup> | 5.16x10 <sup>-28</sup> |
| PYHIN1    | 1.187933  | 1.06x10 <sup>-14</sup> | 8.82x10 <sup>-14</sup> |
| HPSE2     | 1.664522  | 1.89x10 <sup>-06</sup> | 6.92x10 <sup>-06</sup> |
| TXLNB     | 1.328317  | 1.91x10 <sup>-27</sup> | 6.23x10 <sup>-26</sup> |
| KCND2     | 1.368191  | 3.21x10 <sup>-20</sup> | 4.31x10 <sup>-19</sup> |
| TCEAL7    | 1.861364  | 1.81x10 <sup>-32</sup> | 1.33x10 <sup>-30</sup> |
| THEMIS    | 1.312520  | 7.60x10 <sup>-17</sup> | 7.60x10 <sup>-16</sup> |
| HMCN2     | 1.326264  | 8.05x10 <sup>-12</sup> | 5.30x10 <sup>-11</sup> |
| AXL       | 1.128560  | 9.86x10 <sup>-38</sup> | 2.52x10 <sup>-35</sup> |
| C20orf204 | -1.507671 | 3.28x10 <sup>-02</sup> | 4.97x10 <sup>-02</sup> |
| KCNE4     | 1.782787  | 1.15x10 <sup>-35</sup> | 1.59x10 <sup>-33</sup> |
| TPM2      | 1.888840  | 5.86x10 <sup>-15</sup> | 4.99x10 <sup>-14</sup> |
| C16orf89  | 1.100927  | 4.18x10 <sup>-14</sup> | 3.28x10 <sup>-13</sup> |
| COL6A3    | 1.573158  | 1.98x10 <sup>-36</sup> | 3.41x10 <sup>-34</sup> |
| FEZ1      | 1.230279  | 1.42x10 <sup>-27</sup> | 4.72x10 <sup>-26</sup> |
| NFATC4    | 1.040926  | 3.30x10 <sup>-17</sup> | 3.41x10 <sup>-16</sup> |
| LRRK2     | 1.280172  | 7.65x10 <sup>-25</sup> | 1.76x10 <sup>-23</sup> |
| ISLR      | 1.930855  | 7.88x10 <sup>-38</sup> | 2.13x10 <sup>-35</sup> |
| ADHFE1    | 1.039316  | 1.90x10 <sup>-12</sup> | 1.32x10 <sup>-11</sup> |
| COL4A2    | 1.019717  | 3.46x10 <sup>-23</sup> | 6.42x10 <sup>-22</sup> |
| NAIP      | 1.289341  | 7.26x10 <sup>-19</sup> | 8.62x10 <sup>-18</sup> |
| TNFAIP8L2 | 1.123602  | 4.73x10 <sup>-26</sup> | 1.26x10 <sup>-24</sup> |
| SELP      | 1.725856  | 5.94x10 <sup>-24</sup> | 1.23x10 <sup>-22</sup> |
| BAG2      | 1.070972  | 5.04x10 <sup>-10</sup> | 2.83x10 <sup>-09</sup> |
| NGFR      | 1.934461  | 7.05x10 <sup>-21</sup> | 1.01x10 <sup>-19</sup> |
| C11orf96  | 1.476001  | 7.69x10 <sup>-26</sup> | 2.01x10 <sup>-24</sup> |
| GPR88     | 1.993213  | 9.22x10 <sup>-26</sup> | 2.38x10 <sup>-24</sup> |
| P3H4      | -1.047781 | 6.21x10 <sup>-04</sup> | 1.42x10 <sup>-03</sup> |
| PGAP3     | -1.106131 | 1.19x10 <sup>-05</sup> | 3.81x10 <sup>-05</sup> |
| TTPA      | -1.467673 | 1.27x10 <sup>-03</sup> | 2.71x10 <sup>-03</sup> |
| DCLK2     | 1.565193  | 7.55x10 <sup>-30</sup> | 3.56x10 <sup>-28</sup> |
| THBS4     | 4.062219  | 1.61x10 <sup>-35</sup> | 2.16x10 <sup>-33</sup> |
| CTSW      | 1.076667  | 1.39x10 <sup>-11</sup> | 8.93x10 <sup>-11</sup> |
| NCF4      | 1.043482  | 3.76x10 <sup>-19</sup> | 4.60x10 <sup>-18</sup> |
| POU2AF1   | 1.200886  | 4.82x10 <sup>-09</sup> | 2.47x10 <sup>-08</sup> |
| S1PR4     | 1.070610  | 1.70x10 <sup>-16</sup> | 1.65x10 <sup>-15</sup> |
| DAZL      | 2.080499  | 8.85x10 <sup>-24</sup> | 1.80x10 <sup>-22</sup> |
| DNAJC5B   | 1.161269  | 3.53x10 <sup>-15</sup> | 3.04x10 <sup>-14</sup> |
| CD14      | 1.180922  | 5.82x10 <sup>-27</sup> | 1.76x10 <sup>-25</sup> |
| F2RL2     | 1.049393  | 6.83x10 <sup>-13</sup> | 4.88x10 <sup>-12</sup> |
| LRRN4CL   | 1.711408  | 5.76x10 <sup>-28</sup> | 2.03x10 <sup>-26</sup> |
| DPP6      | 2.430362  | 1.61x10 <sup>-09</sup> | 8.65x10 <sup>-09</sup> |
| GNB4      | 1.289736  | 3.89x10 <sup>-37</sup> | 8.44x10 <sup>-35</sup> |

Table SII. Continued.

| Gene      | logFC     | P-value                | FDR                    |
|-----------|-----------|------------------------|------------------------|
| TCEAL5    | 1.429710  | 6.03x10 <sup>-17</sup> | 6.09x10 <sup>-16</sup> |
| AKAP12    | 1.302869  | 7.27x10 <sup>-20</sup> | 9.48x10 <sup>-19</sup> |
| SPEG      | 1.978089  | 2.12x10 <sup>-12</sup> | 1.46x10 <sup>-11</sup> |
| CTCFL     | -1.457534 | 1.90x10 <sup>-02</sup> | 3.07x10 <sup>-02</sup> |
| QRSL1     | -1.582704 | 3.08x10 <sup>-02</sup> | 4.72x10 <sup>-02</sup> |
| ADGRA2    | 1.521787  | 8.33x10 <sup>-38</sup> | 2.21x10 <sup>-35</sup> |
| CX3CR1    | 1.847605  | 9.22x10 <sup>-21</sup> | 1.31x10 <sup>-19</sup> |
| GGT5      | 1.651959  | 8.47x10 <sup>-42</sup> | 6.83x10 <sup>-39</sup> |
| CNFN      | -3.455097 | 8.13x10 <sup>-04</sup> | 1.81x10 <sup>-03</sup> |
| PENK      | 1.614792  | 3.44x10 <sup>-18</sup> | 3.86x10 <sup>-17</sup> |
| GPIHBP1   | 1.490208  | 8.30x10 <sup>-18</sup> | 9.05x10 <sup>-17</sup> |
| C1QTNF3   | 1.691063  | 2.30x10 <sup>-16</sup> | 2.20x10 <sup>-15</sup> |
| SCNN1A    | -1.033300 | 7.62x10 <sup>-10</sup> | 4.22x10 <sup>-09</sup> |
| CLEC17A   | 2.015014  | 1.97x10 <sup>-13</sup> | 1.47x10 <sup>-12</sup> |
| FMO1      | 1.896487  | 2.69x10 <sup>-27</sup> | 8.66x10 <sup>-26</sup> |
| UBASH3A   | 1.072636  | 4.13x10 <sup>-16</sup> | 3.88x10 <sup>-15</sup> |
| CPEB1     | 1.731787  | 7.59x10 <sup>-24</sup> | 1.55x10 <sup>-22</sup> |
| KCNMA1    | 2.898860  | 5.66x10 <sup>-31</sup> | 3.24x10 <sup>-29</sup> |
| PRRG3     | 1.478349  | 4.46x10 <sup>-07</sup> | 1.79x10 <sup>-06</sup> |
| PRIMA1    | 2.306271  | 3.61x10 <sup>-15</sup> | 3.11x10 <sup>-14</sup> |
| LEXM      | -1.178437 | 6.17x10 <sup>-03</sup> | 1.12x10 <sup>-02</sup> |
| HAND2     | 3.442361  | 2.56x10 <sup>-32</sup> | 1.84x10 <sup>-30</sup> |
| TNFRSF13B | 1.423786  | 1.10x10 <sup>-12</sup> | 7.71x10 <sup>-12</sup> |
| SLC22A9   | -1.009033 | 1.74x10 <sup>-02</sup> | 2.83x10 <sup>-02</sup> |
| LRCH2     | 1.564607  | 3.59x10 <sup>-32</sup> | 2.53x10 <sup>-30</sup> |
| SLC9A9    | 1.416079  | 3.69x10 <sup>-32</sup> | 2.59x10 <sup>-30</sup> |
| HEYL      | 1.596824  | 1.83x10 <sup>-30</sup> | 9.65x10 <sup>-29</sup> |
| CYP2F1    | -1.729468 | 1.07x10 <sup>-02</sup> | 1.84x10 <sup>-02</sup> |
| PSORS1C2  | -1.304240 | 5.35x10 <sup>-05</sup> | 1.52x10 <sup>-04</sup> |
| POU2F2    | 1.342047  | 7.33x10 <sup>-17</sup> | 7.34x10 <sup>-16</sup> |
| NRK       | 2.626822  | 6.34x10 <sup>-30</sup> | 3.05x10 <sup>-28</sup> |
| EMCN      | 1.104337  | 1.54x10 <sup>-24</sup> | 3.39x10 <sup>-23</sup> |
| GXYLT2    | 1.538435  | 4.26x10 <sup>-26</sup> | 1.15x10 <sup>-24</sup> |
| FBXO32    | 1.427897  | 6.61x10 <sup>-18</sup> | 7.25x10 <sup>-17</sup> |
| KIF19     | 1.081137  | 9.61x10 <sup>-13</sup> | 6.79x10 <sup>-12</sup> |
| PRELP     | 2.523209  | 2.57x10 <sup>-31</sup> | 1.55x10 <sup>-29</sup> |
| ITGA8     | 1.623739  | 1.90x10 <sup>-12</sup> | 1.32x10 <sup>-11</sup> |
| ITK       | 1.445511  | 8.87x10 <sup>-18</sup> | 9.65x10 <sup>-17</sup> |
| FAM83C    | -2.975373 | 7.31x10 <sup>-05</sup> | 2.02x10 <sup>-04</sup> |
| MDGA1     | 1.205412  | 3.31x10 <sup>-23</sup> | 6.16x10 <sup>-22</sup> |
| ARHGEF6   | 1.344872  | 1.19x10 <sup>-31</sup> | 7.61x10 <sup>-30</sup> |
| PALMD     | 1.011008  | 1.35x10 <sup>-25</sup> | 3.42x10 <sup>-24</sup> |
| SLC8A1    | 1.414228  | 4.48x10 <sup>-32</sup> | 3.07x10 <sup>-30</sup> |
| THSD7B    | 1.983808  | 6.06x10 <sup>-20</sup> | 7.97x10 <sup>-19</sup> |
| GLIPR1    | 1.413836  | 1.17x10 <sup>-37</sup> | 2.87x10 <sup>-35</sup> |
| PCDHGB6   | 1.147234  | 2.92x10 <sup>-24</sup> | 6.18x10 <sup>-23</sup> |
| TP53AIP1  | -1.502201 | 2.53x10 <sup>-06</sup> | 9.13x10 <sup>-06</sup> |
| GRAP2     | 1.100798  | 6.04x10 <sup>-17</sup> | 6.10x10 <sup>-16</sup> |
| SH3BGR    | 1.153729  | 1.56x10 <sup>-10</sup> | 9.12x10 <sup>-10</sup> |
| TLR6      | 1.063252  | 4.86x10 <sup>-21</sup> | 7.10x10 <sup>-20</sup> |
| BNIPL     | -1.950016 | 7.51x10 <sup>-04</sup> | 1.69x10 <sup>-03</sup> |
| MUC22     | -3.782697 | 8.55x10 <sup>-03</sup> | 1.51x10 <sup>-02</sup> |
| DSG1      | -3.358944 | 6.65x10 <sup>-05</sup> | 1.85x10 <sup>-04</sup> |
| RASAL3    | 1.205349  | 1.10x10 <sup>-20</sup> | 1.55x10 <sup>-19</sup> |
| PCP4L1    | 1.068612  | 8.22x10 <sup>-10</sup> | 4.53x10 <sup>-09</sup> |
| NOX4      | 1.386860  | 5.59x10 <sup>-30</sup> | 2.72x10 <sup>-28</sup> |
| TMPRSS11A | -2.518819 | 6.24x10 <sup>-03</sup> | 1.13x10 <sup>-02</sup> |
| ASPN      | 2.096070  | 1.43x10 <sup>-35</sup> | 1.94x10 <sup>-33</sup> |
| AMPH      | 1.525455  | 1.68x10 <sup>-28</sup> | 6.43x10 <sup>-27</sup> |

Table SII. Continued.

| Gene      | logFC     | P-value                | FDR                    |
|-----------|-----------|------------------------|------------------------|
| LINGO3    | 1.581432  | 6.28x10 <sup>-15</sup> | 5.32x10 <sup>-14</sup> |
| HSPB3     | 2.170479  | 3.71x10 <sup>-07</sup> | 1.50x10 <sup>-06</sup> |
| C1QA      | 1.263936  | 1.07x10 <sup>-22</sup> | 1.85x10 <sup>-21</sup> |
| PGLYRP3   | -2.327858 | 1.96x10 <sup>-02</sup> | 3.16x10 <sup>-02</sup> |
| CD1B      | 1.082684  | 4.85x10 <sup>-08</sup> | 2.21x10 <sup>-07</sup> |
| AGTR1     | 1.939860  | 7.68x10 <sup>-21</sup> | 1.10x10 <sup>-19</sup> |
| FABP4     | 2.634002  | 1.38x10 <sup>-20</sup> | 1.92x10 <sup>-19</sup> |
| MXRA8     | 1.223185  | 1.82x10 <sup>-29</sup> | 8.10x10 <sup>-28</sup> |
| FAM216B   | 1.565403  | 4.64x10 <sup>-12</sup> | 3.12x10 <sup>-11</sup> |
| HS3ST2    | 1.261900  | 1.17x10 <sup>-13</sup> | 8.84x10 <sup>-13</sup> |
| MMP11     | 1.237078  | 1.57x10 <sup>-08</sup> | 7.60x10 <sup>-08</sup> |
| DAPL1     | -1.225294 | 2.40x10 <sup>-03</sup> | 4.81x10 <sup>-03</sup> |
| PKD2      | 1.156236  | 1.50x10 <sup>-30</sup> | 8.09x10 <sup>-29</sup> |
| TMEM252   | 2.319324  | 1.89x10 <sup>-16</sup> | 1.83x10 <sup>-15</sup> |
| PPP1R14C  | -1.021220 | 1.71x10 <sup>-03</sup> | 3.54x10 <sup>-03</sup> |
| HAS1      | 1.908832  | 5.69x10 <sup>-17</sup> | 5.75x10 <sup>-16</sup> |
| GJC1      | 1.293817  | 5.89x10 <sup>-20</sup> | 7.76x10 <sup>-19</sup> |
| CCL3      | 1.102405  | 2.53x10 <sup>-08</sup> | 1.20x10 <sup>-07</sup> |
| TNC       | 2.085402  | 3.05x10 <sup>-24</sup> | 6.44x10 <sup>-23</sup> |
| ARHGAP30  | 1.081885  | 6.36x10 <sup>-21</sup> | 9.18x10 <sup>-20</sup> |
| PRDM8     | 1.033936  | 4.66x10 <sup>-24</sup> | 9.73x10 <sup>-23</sup> |
| MMRN2     | 1.147150  | 2.66x10 <sup>-28</sup> | 1.00x10 <sup>-26</sup> |
| PARP15    | 1.148329  | 2.84x10 <sup>-11</sup> | 1.78x10 <sup>-10</sup> |
| THY1      | 1.506233  | 4.40x10 <sup>-39</sup> | 1.70x10 <sup>-36</sup> |
| KRTAP3-1  | -4.876821 | 1.84x10 <sup>-04</sup> | 4.71x10 <sup>-04</sup> |
| TPSB2     | 1.069334  | 3.63x10 <sup>-12</sup> | 2.46x10 <sup>-11</sup> |
| PRR16     | 1.072932  | 1.43x10 <sup>-28</sup> | 5.55x10 <sup>-27</sup> |
| BEST3     | -2.063558 | 1.44x10 <sup>-03</sup> | 3.03x10 <sup>-03</sup> |
| POSTN     | 1.370298  | 2.99x10 <sup>-22</sup> | 4.90x10 <sup>-21</sup> |
| COL12A1   | 1.249312  | 6.22x10 <sup>-23</sup> | 1.11x10 <sup>-21</sup> |
| SYNE4     | -1.076599 | 1.23x10 <sup>-07</sup> | 5.30x10 <sup>-07</sup> |
| ADAMTS3   | 1.115595  | 1.12x10 <sup>-25</sup> | 2.88x10 <sup>-24</sup> |
| NPTX2     | 1.604605  | 3.21x10 <sup>-16</sup> | 3.04x10 <sup>-15</sup> |
| LCN6      | 1.543044  | 1.98x10 <sup>-17</sup> | 2.08x10 <sup>-16</sup> |
| RGL1      | 1.038033  | 4.90x10 <sup>-26</sup> | 1.30x10 <sup>-24</sup> |
| ABCA8     | 2.010137  | 6.87x10 <sup>-17</sup> | 6.90x10 <sup>-16</sup> |
| MORN5     | 3.176312  | 2.99x10 <sup>-09</sup> | 1.56x10 <sup>-08</sup> |
| TBX4      | -1.023769 | 9.97x10 <sup>-03</sup> | 1.73x10 <sup>-02</sup> |
| LILRB1    | 1.138866  | 1.10x10 <sup>-24</sup> | 2.46x10 <sup>-23</sup> |
| STON1     | 2.008394  | 5.30x10 <sup>-32</sup> | 3.57x10 <sup>-30</sup> |
| MLNR      | 2.219472  | 4.03x10 <sup>-10</sup> | 2.29x10 <sup>-09</sup> |
| TBX21     | 1.043747  | 9.16x10 <sup>-13</sup> | 6.48x10 <sup>-12</sup> |
| COL10A1   | 1.681974  | 2.03x10 <sup>-20</sup> | 2.78x10 <sup>-19</sup> |
| CYSLTR1   | 1.651728  | 3.32x10 <sup>-34</sup> | 3.34x10 <sup>-32</sup> |
| CYBRD1    | 1.411149  | 3.71x10 <sup>-27</sup> | 1.17x10 <sup>-25</sup> |
| TRPC4     | 1.541346  | 2.64x10 <sup>-15</sup> | 2.30x10 <sup>-14</sup> |
| CXCL9     | 1.380051  | 1.13x10 <sup>-08</sup> | 5.56x10 <sup>-08</sup> |
| SSC5D     | 2.275290  | 6.17x10 <sup>-37</sup> | 1.21x10 <sup>-34</sup> |
| TMPRSS13  | -1.540136 | 9.74x10 <sup>-03</sup> | 1.69x10 <sup>-02</sup> |
| CD1D      | 1.227142  | 3.84x10 <sup>-26</sup> | 1.04x10 <sup>-24</sup> |
| ADCYAP1R1 | 2.538045  | 4.66x10 <sup>-26</sup> | 1.25x10 <sup>-24</sup> |
| IL10RA    | 1.518456  | 3.00x10 <sup>-27</sup> | 9.56x10 <sup>-26</sup> |
| NDN       | 1.674039  | 1.44x10 <sup>-38</sup> | 4.91x10 <sup>-36</sup> |
| AHSG      | -2.913233 | 1.31x10 <sup>-02</sup> | 2.21x10 <sup>-02</sup> |
| GBP5      | 1.027379  | 3.31x10 <sup>-12</sup> | 2.25x10 <sup>-11</sup> |
| ANKRD33B  | 1.321337  | 5.52x10 <sup>-19</sup> | 6.67x10 <sup>-18</sup> |
| ADAM19    | 1.199974  | 3.60x10 <sup>-34</sup> | 3.60x10 <sup>-32</sup> |
| CXCL11    | 1.247789  | 8.23x10 <sup>-06</sup> | 2.72x10 <sup>-05</sup> |
| CSDC2     | 1.684487  | 6.86x10 <sup>-27</sup> | 2.06x10 <sup>-25</sup> |

Table SII. Continued.

| Gene     | logFC     | P-value                | FDR                    |
|----------|-----------|------------------------|------------------------|
| SULT2B1  | -1.012069 | 1.21x10 <sup>-03</sup> | 2.60x10 <sup>-03</sup> |
| CCIN     | 1.602461  | 6.57x10 <sup>-31</sup> | 3.74x10 <sup>-29</sup> |
| ARHGEF25 | 1.798657  | 3.64x10 <sup>-28</sup> | 1.34x10 <sup>-26</sup> |
| PDLIM3   | 2.270555  | 6.94x10 <sup>-38</sup> | 1.91x10 <sup>-35</sup> |
| CALCRL   | 1.109965  | 9.77x10 <sup>-28</sup> | 3.31x10 <sup>-26</sup> |
| MYCT1    | 1.043388  | 4.16x10 <sup>-29</sup> | 1.76x10 <sup>-27</sup> |
| CPB2     | -1.747105 | 7.12x10 <sup>-04</sup> | 1.61x10 <sup>-03</sup> |
| TRIM61   | 1.129532  | 3.30x10 <sup>-21</sup> | 4.90x10 <sup>-20</sup> |
| DOCK11   | 1.048021  | 9.07x10 <sup>-20</sup> | 1.17x10 <sup>-18</sup> |
| SNAI2    | 1.250308  | 3.70x10 <sup>-30</sup> | 1.86x10 <sup>-28</sup> |
| GLI1     | 1.675401  | 6.82x10 <sup>-28</sup> | 2.37x10 <sup>-26</sup> |
| RNASE6   | 1.424873  | 1.43x10 <sup>-27</sup> | 4.77x10 <sup>-26</sup> |
| WNT2B    | 1.438716  | 1.82x10 <sup>-15</sup> | 1.62x10 <sup>-14</sup> |
| MEOX1    | 1.493752  | 6.50x10 <sup>-22</sup> | 1.03x10 <sup>-20</sup> |
| CEACAM20 | -1.659083 | 2.69x10 <sup>-02</sup> | 4.20x10 <sup>-02</sup> |
| PHLDB2   | 1.264711  | 8.58x10 <sup>-21</sup> | 1.22x10 <sup>-19</sup> |
| PAK3     | 1.214428  | 5.28x10 <sup>-14</sup> | 4.10x10 <sup>-13</sup> |
| CCDC136  | 1.800182  | 4.12x10 <sup>-09</sup> | 2.12x10 <sup>-08</sup> |
| SAMD11   | 1.188849  | 2.16x10 <sup>-16</sup> | 2.07x10 <sup>-15</sup> |
| HLA-DQB2 | 1.227899  | 9.75x10 <sup>-10</sup> | 5.34x10 <sup>-09</sup> |
| COL3A1   | 1.676002  | 9.38x10 <sup>-34</sup> | 8.50x10 <sup>-32</sup> |
| PTN      | 1.159163  | 7.19x10 <sup>-19</sup> | 8.55x10 <sup>-18</sup> |
| RTN1     | 1.227326  | 4.12x10 <sup>-24</sup> | 8.62x10 <sup>-23</sup> |
| SGCA     | 2.375656  | 5.92x10 <sup>-21</sup> | 8.55x10 <sup>-20</sup> |
| P2RX7    | 1.262568  | 4.43x10 <sup>-29</sup> | 1.85x10 <sup>-27</sup> |
| PLEK     | 1.287327  | 3.34x10 <sup>-19</sup> | 4.11x10 <sup>-18</sup> |
| CD300E   | 1.435100  | 2.43x10 <sup>-09</sup> | 1.28x10 <sup>-08</sup> |
| RGS1     | 1.361401  | 4.59x10 <sup>-23</sup> | 8.40x10 <sup>-22</sup> |
| FCRLA    | 2.164865  | 1.18x10 <sup>-18</sup> | 1.38x10 <sup>-17</sup> |
| LRRC17   | 1.475234  | 5.03x10 <sup>-24</sup> | 1.05x10 <sup>-22</sup> |
| PLXDC1   | 1.048789  | 3.48x10 <sup>-30</sup> | 1.77x10 <sup>-28</sup> |
| TMIGD3   | 1.354389  | 1.49x10 <sup>-23</sup> | 2.90x10 <sup>-22</sup> |
| NPR1     | 1.420818  | 1.73x10 <sup>-27</sup> | 5.72x10 <sup>-26</sup> |
| MMP2     | 1.661778  | 9.22x10 <sup>-33</sup> | 6.98x10 <sup>-31</sup> |
| PODNL1   | 1.215024  | 8.82x10 <sup>-19</sup> | 1.04x10 <sup>-17</sup> |
| JAKMIP2  | 1.340136  | 6.91x10 <sup>-25</sup> | 1.60x10 <sup>-23</sup> |
| FCRL2    | 1.508587  | 5.46x10 <sup>-12</sup> | 3.65x10 <sup>-11</sup> |
| RAI2     | 1.195097  | 1.02x10 <sup>-17</sup> | 1.10x10 <sup>-16</sup> |
| LRRC25   | 1.223520  | 7.50x10 <sup>-28</sup> | 2.60x10 <sup>-26</sup> |
| RNF165   | 1.168998  | 2.93x10 <sup>-17</sup> | 3.04x10 <sup>-16</sup> |
| DIO2     | 1.136688  | 6.30x10 <sup>-18</sup> | 6.93x10 <sup>-17</sup> |
| RAET1L   | -1.423420 | 1.09x10 <sup>-02</sup> | 1.88x10 <sup>-02</sup> |
| MCAM     | 1.219384  | 6.86x10 <sup>-23</sup> | 1.22x10 <sup>-21</sup> |
| ZNF521   | 1.452110  | 2.68x10 <sup>-34</sup> | 2.78x10 <sup>-32</sup> |
| FAM180A  | 1.954160  | 8.60x10 <sup>-31</sup> | 4.81x10 <sup>-29</sup> |
| GAPT     | 1.954116  | 4.21x10 <sup>-29</sup> | 1.77x10 <sup>-27</sup> |
| MROH2A   | -1.087381 | 6.12x10 <sup>-03</sup> | 1.12x10 <sup>-02</sup> |
| INHBA    | 1.176444  | 3.95x10 <sup>-22</sup> | 6.41x10 <sup>-21</sup> |
| PEAK3    | 1.070464  | 4.53x10 <sup>-22</sup> | 7.30x10 <sup>-21</sup> |
| CASQ1    | 2.229517  | 2.45x10 <sup>-12</sup> | 1.69x10 <sup>-11</sup> |
| LILRB5   | 1.044393  | 1.04x10 <sup>-13</sup> | 7.90x10 <sup>-13</sup> |
| EFEMP2   | 1.351079  | 4.06x10 <sup>-37</sup> | 8.67x10 <sup>-35</sup> |
| AMPD1    | 1.032596  | 2.72x10 <sup>-08</sup> | 1.28x10 <sup>-07</sup> |
| C4A      | 1.523372  | 8.41x10 <sup>-21</sup> | 1.20x10 <sup>-19</sup> |
| NOS1     | 1.222028  | 1.14x10 <sup>-06</sup> | 4.31x10 <sup>-06</sup> |
| KLHL4    | 2.170823  | 1.30x10 <sup>-29</sup> | 5.98x10 <sup>-28</sup> |
| SCN2B    | 2.136483  | 1.69x10 <sup>-22</sup> | 2.87x10 <sup>-21</sup> |
| RIPPLY3  | -1.367557 | 2.92x10 <sup>-05</sup> | 8.74x10 <sup>-05</sup> |
| LRRC15   | 1.429123  | 1.13x10 <sup>-16</sup> | 1.11x10 <sup>-15</sup> |

Table SII. Continued.

| Gene    | logFC     | P-value                | FDR                    |
|---------|-----------|------------------------|------------------------|
| AQP3    | -1.532499 | 7.12x10 <sup>-03</sup> | 1.28x10 <sup>-02</sup> |
| STAB1   | 1.198162  | 5.39x10 <sup>-30</sup> | 2.65x10 <sup>-28</sup> |
| EVX1    | -1.402052 | 3.47x10 <sup>-03</sup> | 6.70x10 <sup>-03</sup> |
| PTCHD1  | 1.572747  | 8.86x10 <sup>-10</sup> | 4.87x10 <sup>-09</sup> |
| SELENOM | 1.087404  | 7.27x10 <sup>-18</sup> | 7.95x10 <sup>-17</sup> |
| CD6     | 1.141683  | 1.03x10 <sup>-14</sup> | 8.54x10 <sup>-14</sup> |
| PCDHGB7 | 1.199479  | 5.18x10 <sup>-31</sup> | 2.99x10 <sup>-29</sup> |
| SLC34A2 | -1.072289 | 8.58x10 <sup>-03</sup> | 1.51x10 <sup>-02</sup> |
| WFDC5   | -2.666693 | 9.97x10 <sup>-03</sup> | 1.73x10 <sup>-02</sup> |
| SPRR2A  | -2.977568 | 7.82x10 <sup>-03</sup> | 1.39x10 <sup>-02</sup> |
| EPYC    | 1.872852  | 5.51x10 <sup>-11</sup> | 3.36x10 <sup>-10</sup> |
| TMEM100 | 2.557852  | 1.25x10 <sup>-23</sup> | 2.48x10 <sup>-22</sup> |
| BCL2    | 1.029903  | 1.49x10 <sup>-19</sup> | 1.88x10 <sup>-18</sup> |
| COPZ2   | 1.452393  | 1.66x10 <sup>-31</sup> | 1.04x10 <sup>-29</sup> |
| CD300LF | 1.091241  | 1.04x10 <sup>-16</sup> | 1.03x10 <sup>-15</sup> |
| C3AR1   | 1.503940  | 2.51x10 <sup>-30</sup> | 1.30x10 <sup>-28</sup> |
| CSRP1   | 1.625327  | 6.37x10 <sup>-22</sup> | 1.01x10 <sup>-20</sup> |
| VAV1    | 1.060411  | 2.34x10 <sup>-16</sup> | 2.24x10 <sup>-15</sup> |
| HOMER2  | -1.316117 | 7.39x10 <sup>-03</sup> | 1.32x10 <sup>-02</sup> |
| KRT13   | -4.009145 | 3.31x10 <sup>-03</sup> | 6.42x10 <sup>-03</sup> |
| NUDT10  | 1.951649  | 5.53x10 <sup>-28</sup> | 1.96x10 <sup>-26</sup> |

FC, fold-change; FDR, false discovery rate.
